# Supplementary material for: New prophylaxis regimen for SARS-CoV-2 infection in health professionals with low doses of hydroxychloroquine and bromhexine: a randomised, double-blind placebo clinical trial (ELEVATE Trial)
Source: PubMed Central journal article supplement — BMJ Open. 2021 Aug 3;11(8):e045190. doi: 10.1136/bmjopen-2020-045190 (PMC8338318; doi:10.1136/bmjopen-2020-045190), 2021-08-03
Supplement: bmjopen-2020-045190.draft_revisions.pdf [file bmjopen-2020-045190.draft_revisions.pdf]

# BMJ Open

BMJ Open is committed to open peer review. As part of this commitment we make the peer review history of every article we publish publicly available.

When an article is published we post the peer reviewers' comments and the authors' responses online. We also post the versions of the paper that were used during peer review. These are the versions that the peer review comments apply to.

The versions of the paper that follow are the versions that were submitted during the peer review process. They are not the versions of record or the final published versions. They should not be cited or distributed as the published version of this manuscript.

BMJ Open is an open access journal and the full, final, typeset and author-corrected version of record of the manuscript is available on our site with no access controls, subscription charges or pay-per-view fees (<http://bmjopen.bmj.com>).

If you have any questions on BMJ Open's open peer review process please email [info.bmjopen@bmj.com](mailto:info.bmjopen@bmj.com)

# BMJ Open

## **New prophylaxis regimen for SARS-CoV-2 infection in health professionals with low doses of Hydroxychloroquine and Bromhexine. A randomized, double-blind placebo-controlled clinical trial (ELEVATE Trial).**

|                               |                                                                                                                                                                                                                                                                                                                                                                                                                                                                                                                                                                                                                                                                                                                                                                                                                                                                                                    |
|-------------------------------|----------------------------------------------------------------------------------------------------------------------------------------------------------------------------------------------------------------------------------------------------------------------------------------------------------------------------------------------------------------------------------------------------------------------------------------------------------------------------------------------------------------------------------------------------------------------------------------------------------------------------------------------------------------------------------------------------------------------------------------------------------------------------------------------------------------------------------------------------------------------------------------------------|
| Journal:                      | <i>BMJ Open</i>                                                                                                                                                                                                                                                                                                                                                                                                                                                                                                                                                                                                                                                                                                                                                                                                                                                                                    |
| Manuscript ID                 | bmjopen-2020-045190                                                                                                                                                                                                                                                                                                                                                                                                                                                                                                                                                                                                                                                                                                                                                                                                                                                                                |
| Article Type:                 | Protocol                                                                                                                                                                                                                                                                                                                                                                                                                                                                                                                                                                                                                                                                                                                                                                                                                                                                                           |
| Date Submitted by the Author: | 28-Sep-2020                                                                                                                                                                                                                                                                                                                                                                                                                                                                                                                                                                                                                                                                                                                                                                                                                                                                                        |
| Complete List of Authors:     | <p>GRANADOS-MONTIEL, JULIO; Instituto Nacional de Rehabilitacion Luis Guillermo Ibarra Ibarra, Hazan-Lasri, Eric; Instituto Nacional de Rehabilitacion Luis Guillermo Ibarra Ibarra<br/> Martinez-Portilla, Raigam ; Maternal-Fetal Medicine and Therapy Research Center Mexico. In behalf of the Iberoamerican Research Network in Translational, Molecular and Maternal-Fetal Medicine, Mexico.<br/> Franco-Cendejas, Rafael; Instituto Nacional de Rehabilitacion Luis Guillermo Ibarra Ibarra<br/> Chavez-Heres, Tatiana; Instituto Nacional de Rehabilitacion Luis Guillermo Ibarra Ibarra<br/> Silva-Bermudez, Phaedra; Instituto Nacional de Rehabilitacion Luis Guillermo Ibarra Ibarra<br/> Aguilar-Gaytan, Rocio; Instituto Nacional de Rehabilitacion Luis Guillermo Ibarra Ibarra<br/> Manzano-Leon, Natalia; Instituto Nacional de Cancerologia, Division de Investigacion Basica</p> |
| Keywords:                     | COVID-19, INFECTIOUS DISEASES, PREVENTIVE MEDICINE, Clinical trials < THERAPEUTICS                                                                                                                                                                                                                                                                                                                                                                                                                                                                                                                                                                                                                                                                                                                                                                                                                 |
|                               |                                                                                                                                                                                                                                                                                                                                                                                                                                                                                                                                                                                                                                                                                                                                                                                                                                                                                                    |

SCHOLARONE™  
Manuscripts

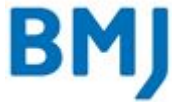

I, the Submitting Author has the right to grant and does grant on behalf of all authors of the Work (as defined in the below author licence), an exclusive licence and/or a non-exclusive licence for contributions from authors who are: i) UK Crown employees; ii) where BMJ has agreed a CC-BY licence shall apply, and/or iii) in accordance with the terms applicable for US Federal Government officers or employees acting as part of their official duties; on a worldwide, perpetual, irrevocable, royalty-free basis to BMJ Publishing Group Ltd ("BMJ") its licensees and where the relevant Journal is co-owned by BMJ to the co-owners of the Journal, to publish the Work in this journal and any other BMJ products and to exploit all rights, as set out in our [licence](#).

The Submitting Author accepts and understands that any supply made under these terms is made by BMJ to the Submitting Author unless you are acting as an employee on behalf of your employer or a postgraduate student of an affiliated institution which is paying any applicable article publishing charge ("APC") for Open Access articles. Where the Submitting Author wishes to make the Work available on an Open Access basis (and intends to pay the relevant APC), the terms of reuse of such Open Access shall be governed by a Creative Commons licence – details of these licences and which [Creative Commons](#) licence will apply to this Work are set out in our licence referred to above.

Other than as permitted in any relevant BMJ Author's Self Archiving Policies, I confirm this Work has not been accepted for publication elsewhere, is not being considered for publication elsewhere and does not duplicate material already published. I confirm all authors consent to publication of this Work and authorise the granting of this licence.

1  
2  
3 **New prophylaxis regimen for SARS-CoV-2 infection in health professionals with low**  
4 **doses of Hydroxychloroquine and Bromhexine. A randomized, double-blind placebo-**  
5 **controlled clinical trial (ELEVATE Trial).**  
6  
7  
8  
9  
10  
11

12 Julio Granados Montiel<sup>1\*</sup>, Eric Joseph Hazan Lasri<sup>2</sup>, Raigam J. Martinez-Portilla<sup>3</sup> Rafael  
13 Franco Cendejas<sup>4</sup>, Tatiana Chávez Heres<sup>5</sup>, Phaedra Suriel Silva Bermúdez<sup>1</sup>, Rocío Aguilar  
14 Gaytán<sup>1</sup>, Natalia Manzano-León<sup>6</sup>.  
15  
16  
17  
18  
19  
20  
21

22 \*Corresponding author

23 Julio Granados-Montiel.

24 Av. México-Xochimilco 289 col. Arenal de Guadalupe, Tlalpan. Mexico City, Mexico.  
25 C.P. 14389.

26 juliogram@gmail.com  
27  
28  
29  
30  
31

32 Author affiliations

33 1 Tissue Engineering and Regenerative Medicine Unit. National Institute of Rehabilitation.  
34 Mexico City, Mexico.

35 2 Division of Traumatology, Emergencies and Bone Infections. National Institute of  
36 Rehabilitation. Mexico City, Mexico.

37 5 División de Investigación Clínica. Instituto Nacional de Perinatología Isidro Espinosa de  
38 los Reyes (INPer). México.

39 3 Infectology Laboratory. National Institute of Rehabilitation. Mexico City, Mexico.

40 4 Service, Hospital Epidemiological Surveillance Unit. National Institute of Rehabilitation.  
41 Mexico City, Mexico.

42 5 División de Investigación Básica. Instituto Nacional de Cancerología (INCan). México.

43 6 Managing Director. National Institute of Rehabilitation. Mexico City, Mexico.  
44  
45  
46  
47  
48  
49  
50  
51

52 Word count: 6041 pages 4-17.

53  
54 Key words: prophylaxis, SARS-CoV-2, Covid19, health professionals,  
55 hydroxychloroquine, bromhexine.  
56  
57  
58  
59  
60

## ABSTRACT

**Introduction** In December 2019, the presence of pneumonia cases caused by the SARS-CoV-2 virus was reported in the city of Wuhan in Hubei province, China. This highly infectious new virus is the cause of severe acute respiratory syndrome (SARS). SARS-CoV-2 infection produces mild symptoms in 80% of those infected, severe symptoms in 15%, while 5% will require admission to the intensive care unit, and artificial respirator use. As of April 15, 2020, SARS-CoV-2 has caused 1,918,138 confirmed cases of infection and 123,126 deaths. In Mexico, it has produced 8,261 confirmed cases and 686 deaths. It is estimated, according to the experience of Italy, that 20% of health workers will be infected by this virus, causing 4.4% of deaths among them.

The SARS-CoV-2 virus binds to the pneumocyte through the angiotensin-converting enzyme (ACE) receptor. Two of the most promising treatments work by inhibiting binding to this receptor. These drugs are hydroxychloroquine and bromhexine. This study's objective is to assess the efficacy of hydroxychloroquine + bromhexine as a prophylactic treatment for SARS-CoV-2 infection in healthy health workers exposed to the first line of care in patients with suspected or confirmed infection by this virus.

**Methods and analysis** A simple, double-blind, randomized clinical study of parallel allocation in a 1:1 ratio, placebo control, low doses of hydroxychloroquine (200 mg every 24 hours for 60 days + bromhexine syrup 8 mg every 8 hours for 60 days) will be administered. The control group will receive 8 mg bromhexine syrup every 8 hours for 60 days + placebo, which will be identical to hydroxychloroquine. The primary endpoint will be the efficacy of the intervention determined as the proportion of infected personnel in the intervention group divided by the proportion of infected in the control group in a period of 60 days and expressed in relative risk, absolute risk and analysis of survival. The results will be evaluated 30 days after the start of treatment, and close monitoring will be maintained for possible adverse events related to the use of the drugs. At least a 16% reduction in absolute risk is expected between the intervention and control group. At least a minimum of 20% infected is expected in the control group. The sample was calculated using a type 1 error of 0.0501 and a power of 80% plus 10% of possible losses, for a total of 140 volunteers assigned in parallel to two groups of 70 participants each. Adherence to treatment of more than 50% is expected. The study will be carried out for six months from its beginning. During this time is expected to finish the collection of the sample and adequate follow-up of the participants. The study will begin on May 1, 2020, and will end in November 2020. The statistical analysis will be available in December 2020 and the final results in January 2021.

**Ethics and dissemination** The protocol is approved by the local medical ethical review committee at the National Institute of Rehabilitation Luis Guillermo Ibarra Ibarra with the internal number INRLGII/25/20 and by The Federal Commission for Protection against Sanitary Risk (in Spanish, Comisión Federal para la Protección contra Riesgos Sanitarios, COFEPRIS) approval number 203300410A0058/2020. The protocol was peer reviewed to obtain funding from Mexico City Government.

**Trial registration number** NCT04340349.

### Strengths and limitations of this study

- ▶ This simple, double-blind, randomized clinical study will provide important information of two of the most promising prophylactic treatment for SARS-CoV-2 infection: hydroxychloroquine and bromhexine.
- ▶ A sample of 140 participants: Healthy health workers exposed to the first line of care in patients with suspected or confirmed infection.
- ▶ The health system depends significantly on the medical personnel's number and capacity assigned to its units, so each withdrawal (temporary or permanent) represents a significant loss. The study of prophylactic treatment in this population is of great value and would be the basis for protecting medical workers worldwide.
- ▶ All the data collected from this study will play an important role in the future reaction to a new outbreak.
- ▶ This kind of study will play a crucial role in new management and prevention of the viral outbreak in other areas. It will also play an essential role in reducing the response time to new emergencies in the hospital.

## INTRODUCTION

On December 31, 2019, an outbreak of 27 pneumonia cases of unknown etiology was reported in Wuhan, Hubei province, China. A week later, the agent that caused the outbreak was identified as a new virus of the Coronaviridae family, being designated as a “severe acute respiratory syndrome coronavirus 2” (SARS-CoV-2) by the International Committee on Taxonomy of Viruses. On January 12, 2020, China publicly shared the genetic sequence of COVID-19, and on January 14, the human-to-human transmission capacity of this virus was identified.[1,2] The affectation caused by this virus, the coronavirus disease 2019 (COVID-19), has already become a pandemic, implying the biggest battle in the health issue in recent years. Due to its biological characteristics and its high transmissibility, as of April 15, 2020, according to The World Health Organization (WHO), it has 1,918,138 confirmed cases of infection and 123,126 deaths worldwide. Latin America currently has 673,361 confirmed cases.[3] In Mexico, 5,847 confirmed cases have been reported, affecting 57.79% males and 42.21% females and 449 deaths have been registered.[4] The age group ranging between 30 and 79 years is the most frequently infected, where 81% present mild, 14% severe and 5% critical.

The SARS-CoV-2 is a betacoronavirus and this virus has an incubation period between 3 to 7 days,[5] it is transmitted through respiratory droplets from humans through contact with contaminated fomites and aerosols. On the other hand, it has been found that asymptomatic patients in close contact can transmit the disease,[6] and fecal-oral transmission has also been described as a transmission mechanism.[7] The infectivity of this virus is higher than the influenza virus's infectivity, with an R0 value of 2.28.[8] It is estimated that an infected person can infect between 2 to 6.5 people.[9] The mechanism through which the virus infects the respiratory cell could be due to the angiotensin-converting enzyme protein 2 (ACE-2). This receptor is found in multiple tissues such as the oral cavity, brain, kidneys, intestine, and placenta. [10-12]

Health personnel is not exempt from contracting the disease. In China, it was reported that 3.5-4.4% of the infected population belonged to this group, and 14.8% presented characteristics of severity or critical illness.[5,13,14] In Italy, around 20% of healthcare professionals became infected.[15] The mean age of health workers who died was 55 years with a range of 29-72 years. The mean period from hospital admission to death was 19 days, with a range of 1-47 days.[14]

The Chloroquine has been used as an antimalarial agent. It blocks viral infection by increasing the endosomal pH required for virus fusion to the cell and interferes with glycosylation of SARS-CoV-2 cell receptors.[16,17] However, its use is not safe since both chloroquine and hydroxychloroquine (similar in structure but with less toxicity and better tolerability) can cause myocardial toxicity (restrictive or dilated cardiomyopathy). These drugs can cause conduction disturbances atrioventricular (AV) or Bundle Branch block since, being aminophilic cations, they bind to cardiomyocyte phospholipids, causing intracellular inhibition of cardiomyocyte lysosomal enzymes and finally altering the degradation of pathological metabolites such as phospholipids and glycogen. These effects are more frequent in elderly patients, females, drug use >3 months, pre-existing heart disease, kidney failure and use of high doses of chloroquine per mg/kg body weight/day.[18] Other toxic effects described are retinopathy and neuromyopathy.[19]

The Bromhexine, a derivative of the *Adhatoda vasica* plant (*Justicia adhatoda*), modifies the composition of mucus, increases ciliary clearance and decreases cough, improving

1  
2  
3 respiratory symptoms. It has also been reported to enhance the effects of some  
4 antibiotics.[20] Bromhexine has a specific inhibitory effect on human Transmembrane  
5 serine protease (TMPRSS2).[21] The mechanism by which SARS-CoV-2 enters human  
6 cells depends on the receptor for the angiotensin-converting enzyme 2 (ACE-2) and the  
7 serine protease TMPRSS2.[22] There are currently several drugs that demonstrate a  
8 specific inhibition of the serine protease TMPRSS2, among them, are Camostat, Mesylate  
9 and Nafamostat, both drugs approved by the FDA but not available in Mexico and that  
10 produce side effects and contraindications. Bromhexine turns out to be an ideal candidate  
11 since it has no contraindications, and its side effects are minimal, demonstrating an  
12 extensive margin of pharmacological safety. Bromhexine is widely available in the country  
13 and its low cost makes it an ideal therapeutic option.

14  
15  
16 In a letter to the editor in the New England Journal of Medicine, of 77,262 patients infected  
17 by COVID-19, 3387 (4.4%) were from health workers. Of these, 23 have died from this  
18 disease. The prevalence of infections in health personnel is alarming since the health  
19 services in the first world countries have been overwhelmed by this disease. Each one of  
20 the health personnel is fundamental and indispensable to reduce mortality and give  
21 opportunity care to those patients who require it. In Italy, around 20% of health  
22 professionals had a SARS-CoV-2 infection.[15] Faced with a highly contagious disease, the  
23 care of health workers, who are first line of contact and on whom the health system of each  
24 country depends, is essential. This research regarding the use of hydroxychloroquine and  
25 bromhexine versus bromhexine in health personnel will allow us to determine and compare  
26 the effectiveness of both interventions, which is of vital importance to clarify whether these  
27 treatments are effective in preventing the appearance of infection in this population.  
28 Describing for the first time that both hydroxychloroquine and bromhexine could function  
29 as disease preventives, would allow us to provide prophylaxis to all-inclusive health  
30 professionals in each country. Therefore the use of hydroxychloroquine+bromhexine in  
31 prophylactic doses in healthy health personnel exposed to the first line of care in patients  
32 confirmed or suspected with SARS-CoV-2 will significantly reduce infections. This drug  
33 combination will be more effective compared with the exclusive use of bromhexine at  
34 prophylactic doses in the same exposed population and will not have significant adverse  
35 events such as mortality, nausea, vomiting, abdominal pain, diarrhea, rash, itchy skin, hair  
36 loss, lengthening of the QT interval in the electrocardiogram (>500 msec), opacity corneal,  
37 cardiac arrhythmias, heart failure or renal failure (defined as glomerular filtration  
38 <20mL/min), when compared with the exclusive use of bromhexine at prophylactic doses.

## 43 44 **METHODS AND ANALYSIS**

### 45 **Study design**

46 Randomized, parallel-group, double-blind, placebo-controlled, 1:1 assignment to determine  
47 the efficacy of low-dose hydroxychloroquine + bromhexine vs. low dose bromhexine, for  
48 the prevention of SARS-CoV-2 infection in healthcare workers. The study will be carried  
49 out at the “Instituto Nacional de Rehabilitación, Luis Guillermo Ibarra Ibarra” (INR LGII).  
50 This institution is a third-level hospital that at the time of writing this protocol has not been  
51 designated as a COVID-19 hospital. However, at this time that we are in phase 3, it is  
52 assumed that every person who enters the hospital is a symptomatic or asymptomatic  
53 carrier. Likewise, health personnel working at the “Instituto Nacional de Ciencias Médicas  
54 y Nutrición, Salvador Zubirán” (INCMNSZ) and falls within the inclusion criteria of the  
55  
56  
57  
58  
59



protocol will attend the “Instituto Nacional de Rehabilitación Luis Guillermo Ibarra Ibarra” on their own for participate in the clinical study.

### Participants

The inclusion of participants will be assessed according to the eligibility criteria and by invitation to the same. Table 1 shows the classification of study variables according to the intervention and control groups.

Table 1 Classification of variables.

| Variable        | Conceptual definition                                                               | Operational definition                                                                                             | Measurement scale       |
|-----------------|-------------------------------------------------------------------------------------|--------------------------------------------------------------------------------------------------------------------|-------------------------|
| Age             | Date at recruitment minus date of birth                                             | Years old                                                                                                          | Quantitative            |
| Sex             | Male or female genotype of the person                                               | Man or woman                                                                                                       | Qualitative nominal     |
| Weight          | How much the patient weighs at the time of study inclusion                          | Weight in kilograms                                                                                                | Continuous quantitative |
| Size            | How tall is the patient from head to toe at the time of study inclusion             | Height centimeters                                                                                                 | Continuous quantitative |
| Body mass index | The division between weight by height squared at the time of inclusion in the study | Units of kg / cm <sup>2</sup>                                                                                      | Continuous quantitative |
| Occupation      | Remunerative work performed by the participant at the time of recruitment           | Unemployed, informal, unskilled employee, micro-entrepreneur or saleswoman, administrative employee, professional, | Qualitative nominal     |

|                |                                                                                                               |                                                                                                         |                     |
|----------------|---------------------------------------------------------------------------------------------------------------|---------------------------------------------------------------------------------------------------------|---------------------|
|                |                                                                                                               | entrepreneur                                                                                            |                     |
| Civil status   | Civil status of the individual                                                                                | Married, single, widowed, divorced, common-law union                                                    | Qualitative nominal |
| Level of study | Years completed and approved at the time of study recruitment                                                 | With or without studies, primary, secondary, preparatory, technical career, undergraduate, postgraduate | Ordinal qualitative |
| Alcohol intake | Consumption of alcoholic beverages                                                                            | Intake of alcoholic beverages                                                                           | Qualitative nominal |
| Smoking habit  | Habitual tobacco use at the time of recruitment                                                               | Number of packs of cigarettes consume per day.                                                          | Quantitative        |
| Drug's use     | Regular use of chemicals such as amphetamines, cocaine, marijuana, LSD, heroin, glass                         | Consumption of drugs                                                                                    | Qualitative nominal |
| Hypertension   | Elevation of blood pressure >130/80                                                                           | Individual risk of hypertension                                                                         | Qualitative nominal |
| Asthma         | Chronic inflammatory disease characterized by bronchial hyperactivity with recurrent episodes of bronchospasm | Individual Risk of Asthma                                                                               | Qualitative nominal |
| Diabetes       | Group of metabolic diseases, which occurs when the pancreas does not produce enough                           | Individual risk of diabetes                                                                             | Qualitative nominal |

|                     |                                                                                                                                                                                                                                                                                           |                                                     |                     |
|---------------------|-------------------------------------------------------------------------------------------------------------------------------------------------------------------------------------------------------------------------------------------------------------------------------------------|-----------------------------------------------------|---------------------|
|                     | insulin or when the body does not use the insulin it produces effectively                                                                                                                                                                                                                 |                                                     |                     |
| Obesity             | Pathological state characterized by a general excess or excessive accumulation of fat in the body                                                                                                                                                                                         | Individual risk of obesity                          | Qualitative nominal |
| SARS                | A form of severe pneumonia caused by coronavirus                                                                                                                                                                                                                                          | Individual risk for SARS                            | Qualitative nominal |
| Death               | Statistical term that describes the death of an individual                                                                                                                                                                                                                                | Individual risk of death                            | Qualitative nominal |
| Intensive Care Unit | Special facility in a hospital area, which provides life support to critically ill patients, requiring intensive supervision and monitoring                                                                                                                                               | Individual risk of admission to intensive care unit | Qualitative nominal |
| Severe pneumonia    | Defined by the American Thoracic Society Criteria requiring at least one main criterion (need for invasive mechanical ventilation and shock with need for vasopressors), or three minor criteria (respiratory rate > 30 bpm, PaO <sub>2</sub> / FiO <sub>2</sub> ratio < 250, Infiltrates | Presence of pneumonia                               | Qualitative nominal |

|                      |                                                                                                                                                                                                                                                                                                                               |                                     |                     |
|----------------------|-------------------------------------------------------------------------------------------------------------------------------------------------------------------------------------------------------------------------------------------------------------------------------------------------------------------------------|-------------------------------------|---------------------|
|                      | <p>multilobars, confusion / disorientation, uremia [BUN&gt; 20 mg / dL], leukopenia [<math>&lt;4,000</math>], thrombocytopenia [<math>&lt;100,000</math> platelets / <math>\text{mm}^3</math>], hypothermia [core temperature <math>&lt;36^\circ\text{C}</math>], or hypotension requiring aggressive fluid resuscitation</p> |                                     |                     |
| Pneumonia            | Acute infection of the lung parenchyma, accompanied by bilateral infiltrates on chest X-ray                                                                                                                                                                                                                                   | Presence or not of pneumonia        | Qualitative nominal |
| Confusion            | Glasgow scale less than 15                                                                                                                                                                                                                                                                                                    | Individual risk of confusion        | Qualitative nominal |
| Hypothermia          | Body temperature less than 36 degrees Celsius                                                                                                                                                                                                                                                                                 | Individual risk of hypothermia      | Qualitative nominal |
| Thrombocytopenia     | Total platelets less than 100,000 per $\text{mm}^3$ .                                                                                                                                                                                                                                                                         | Presence or not of thrombocytopenia | Qualitative nominal |
| Arterial hypotension | Systolic blood pressure less than 90 mmHg or mean arterial pressure less than 60 mmHg                                                                                                                                                                                                                                         | Individual risk of hypotension      | Qualitative nominal |
| Sepsis               | Rapid SOFA score (qSOFA) with 2 of the following three                                                                                                                                                                                                                                                                        | Individual risk of sepsis           | Qualitative nominal |

|                                                  |                                                                                                                                                                                                       |                                                                            |                     |
|--------------------------------------------------|-------------------------------------------------------------------------------------------------------------------------------------------------------------------------------------------------------|----------------------------------------------------------------------------|---------------------|
|                                                  | clinical variables:<br>Glasgow $\leq 13$ ,<br>systolic pressure<br>$\leq 100$ mm Hg, or<br>respiratory rate $\geq 22$<br>bpm                                                                          |                                                                            |                     |
| RT-PCR for SARS-CoV2                             | Molecular diagnosis for SARS-CoV from viral RNA                                                                                                                                                       | Positive or negative                                                       | Qualitative nominal |
| Septic shock                                     | Arterial hypotension that persists after resuscitation volume and that requires vasopressors to maintain MAP $\geq 65$ mm Hg and lactate $\geq 2$ mmol / L (18 mg / dL) in the absence of hypovolemia | Individual risk of septic shock                                            | Qualitative nominal |
| Adverse events related to the use of Chloroquine | Indirect drug-related mortality, nausea, vomiting, abdominal pain, rash, itchy skin, hair loss, QT segment elongation on electrocardiogram, corneal opacity, cardiac arrhythmias, and heart failure   | Individual risk of adverse events related to the use of hydroxychloroquine | Qualitative nominal |
| Adverse events related to the use of Bromhexine  | Indirect drug-related mortality, nausea, vomiting, abdominal pain, rash, itchy skin, hair loss, QT segment elongation on electrocardiogram,                                                           | Individual risk of adverse events related to the use of Bromhexine         | Qualitative nominal |

|                                         |                                                               |                                                               |                     |
|-----------------------------------------|---------------------------------------------------------------|---------------------------------------------------------------|---------------------|
|                                         | corneal opacity,<br>cardiac arrhythmias,<br>and heart failure |                                                               |                     |
| Severe acute<br>respiratory<br>syndrome | A form of severe<br>pneumonia caused<br>by coronavirus        | Individual risk of<br>severe acute<br>respiratory<br>syndrome | Qualitative nominal |

The study variables will be divided according to the allocation group (intervention and control). The distribution of continuous variables will be assessed using the Shapiro Wilk test and Skewness and Kurtosis. The variables of normal distribution will be compared using the Student's t-test, free distribution using the Mann-Whitney U-test. Categorical variables will be evaluated using the Chi square-test.

#### Inclusion criteria

- ▶ Health personnel working at “Instituto Nacional de Rehabilitación and at “Instituto Nacional de Ciencias Médicas y Nutrición Salvador Zubirán”
- ▶ Over 18 and under 60 years, both sex.
- ▶ Exposed to the care of patients with suspected or confirmed SARS-CoV-2
- ▶ Normal electrocardiogram.

#### Exclusion criteria

- ▶ Reverse transcriptase-polymerase chain reaction (RT-PCR) test for SARS-CoV-2 positive at the time of inclusion.
- ▶ Panel of IgG or IgM antibodies positive for SARS-CoV-2 at the time of inclusion.
- ▶ Development of respiratory symptoms suspicious of SARS-CoV-2 during the first 7 days after starting treatment, confirmed by RT-PCR.
- ▶ Under 18 and over 60 years.
- ▶ Health personnel with morbidities such as diabetes, hypertension, autoimmune disease (such as porphyria, psoriasis, systemic lupus erythematosus), obesity as body mass index ( $BMI \geq 30$ ), cardiovascular disease, respiratory diseases (such as asthma, chronic bronchitis, idiopathic pulmonary fibrosis).
- ▶ Allergic to any hydroxychloroquine or bromhexine compound.
- ▶ Use of immunosuppressant for any reason.
- ▶ History of a bone marrow transplant
- ▶ Known glucose-6-phosphate dehydrogenase (G6PD) deficiency.
- ▶ Chronic kidney disease or glomerular filtration  $< 20$  ml/min
- ▶ Use of other drugs as digitalis, flecainide, amiodarone, procainamide, or propafenone.
- ▶ History of long QT syndrome
- ▶ Electrocardiogram with  $QTc > 500$  msec.
- ▶ Pregnant or breastfeeding

- ▶ Epilepsy
- ▶ Known liver disease

#### Elimination criteria

- ▶ Personnel who decide to leave the study for any reason not related to adverse events.
- ▶ Personnel with incomplete information on the primary outcome (RT-PCR test for SARS-CoV-2).
- ▶ Personnel who are relocated to work in another institution.
- ▶ Personnel who do not wish to perform consecutive sample analysis for SARS-CoV-2 at 30 and 60 days after the start of pharmacological treatment.

#### Sample size calculation

According to the study by Remuzzi A et al.[15] the proportion of healthcare workers infected with SARS-CoV-2 and confirmed by RT-PCR was 20%. Taking this 20% as our null hypothesis, we calculate that the proportion of infections in the intervention group will be 4%. Using a two-tailed test, with a type I error of 0.0501, a power of 80%, and calculating a loss of 10% of participants for each group, we estimate that a total of 140 participants will be required, distributed in parallel groups (1:1) of 70 each. This number of volunteers will allow us to find a difference of 16% between groups with a power of 80%. To ensure that desired sample size is reached, all health workers involved in dealing with patients suspected or infected by SARS-CoV-2 will be invited personally and by institutional email.

The group's assignment will be in a centralized and straightforward random way using the Web program [www.randomization.com](http://www.randomization.com). The randomization will be carried out independently by a researcher who will be blind to the inclusion criteria, the delivery of drugs, the participant's follow-up, the results, the statistical analysis, and the writing of the final article. The allocation will be established, for 140 participants in blocks of 70 and 70 assigned as intervention vs. control.

#### Investigational product/intervention

In the experimental group, the intervention will consist of low (prophylactic) doses of hydroxychloroquine (Plaquenil) 200 mg tablets every 24 hours for 60 days + Bromhexine syrup (Bisolvón) 8 mg every 8 hours for 60 days. Hydroxychloroquine tablets and bromhexine syrup will be given to each participant in the total dose for the 60 days of the study and an extra dose if loss of the medication. The drugs will be provided directly in the hospital by an investigator blinded to group assignment process. In addition to the bromhexine, a graduate spoon will be given to ensure that participants take the appropriate dose assigned.

The intervention in the control group will consist of a placebo dose of bromhexine syrup (Bisolvón) 8 mg every 8 hours for 60 days in the control group. Bromhexine syrup will be given to each participant in the total dose for 60 days and an extra dose if the loss of the drugs. The medicine will be delivered directly by a blind researcher to the group's assignment to which the participant belongs. A graduate spoon will also be provided to ensure that participants take the proper assigned dose.

To ensure that the intervention is carried out, each participant will be asked to keep a written record of the days and time the medication was administered. This document will be reviewed weekly to verify that more than 50% adherence to treatment is maintained.

Participants will be asked to record any symptoms related to the use of the medication, which will be reviewed by a researcher blinded to group assignment, weekly, or at the participant's request.

If any of the participant present symptoms of SARS-CoV-2 infection after the first 14 days after the start of the intervention and positive RT-PCT disease is confirmed, the drug will be discontinued. If the participant presents adverse events related to the drugs that are not tolerable, the treatment will be suspended. If the participants have an adherence of less than 50% of the medication, the intervention will be discontinued.

The use of drugs that interact with hydroxychloroquine or bromhexine such as flecainide, digitalis, amiodarone, procainamide or propafenone will be prohibited. If the participant has to use these drugs during the study period will be eliminated from the study.

A free diet and outdoor activity will be allowed since these do not intervene with the implementation of the treatment or have interaction with the drugs used.

Likewise, the incidence of adverse events such as mortality, nausea, vomiting, abdominal pain, rash, itchy skin, hair loss, lengthening of the QT interval in the electrocardiogram, corneal opacity, cardiac arrhythmias and, heart failure, will be determined.

### **Randomization and treatment allocation**

The selection of health workers will be made regardless of the hospital shift, work schedule, or assigned area. If the desired sample size is not reached, the inclusion of personnel involved in the first line of care of other referral hospitals for patients with SARS-CoV-2 will be considered.

According to the Web, an independent researcher will place the treatments for the experimental and control group to effectively hide the assignment groups. These envelopes will be correctly sealed, and inside will contain Bromhexine for both groups. In those who do not require hydroxychloroquine, the drug will be replaced by tablets identical in color and taste like hydroxychloroquine tablets, but lack active substance. In this way, the drugs used in both groups will be indistinguishable.

Researcher A will recruit the participants and assess the inclusion criteria according to the serological, electrocardiographic, and biochemical results. Once included, volunteers will go to another office with researcher B, who will be blind to the first procedure and the rest of the study. Researcher B will assign the groups independently, centrally, and through the use of a web program. This same researcher B will be the one who makes the packages indistinguishable to the person providing the drugs to the participant. Researcher C will provide treatment in a sealed envelope or box to the participant in the order of assignment without knowing each participant's original assignment. This researcher will also be blind to the assignment and the rest of the results.

Participants will be blinded to the assignment of the treatment they will receive. Researcher A will be blinded to what the recruitment will do, researcher B who will do the group assignment and packing of the treatment, and researcher C who will deliver the treatment in packages or sealed envelopes in consecutive order without knowing what treatment each participant is receiving. The researchers in the follow-up group, the researchers in the results assessment group, and the researcher who performs the statistical analysis will be blind.



1  
2  
3 Informed consent will be obtained only by researcher A. If researcher A is not available,  
4 the study administrator may obtain informed consent for participation. The informed  
5 consent will contain the authorization to participate in the study and the authorization for  
6 the taking of biological samples, electrocardiogram, and authorization to handle personal  
7 information.  
8

9 All participants will complete a written informed consent included on the first page of the  
10 questionnaire that requires permission to participate in the study. No candidate is required  
11 to participate in the study, and their participation is based on the agreement that they can  
12 withdraw at any time.

13 All participants have the right to withdraw from the study if they feel uncomfortable  
14 answering a question or with a test to be performed. Also, no one, including the research  
15 team, will require the reason why the participant decides to leave the study.

16 In order to protect the confidentiality of the participants, each one will be assigned a  
17 participation number, and all biological samples, as well as medical history information,  
18 will be identified by the participant's initials, date of birth and participant number. Part of  
19 the confidentiality protection process will include data capture only by the researcher in  
20 charge of data capture (researcher D), who will be the same for all participants and the  
21 entire study. Secondly, the study administrator may also enter data into the database if  
22 researcher D is unwell.  
23

24 The study administrator will be blind to the allocation and results of the participants.  
25 However, the administrator will be the only one who will be able to reveal the group and  
26 treatment assignment in any of the cases: major adverse events such as cardiac arrhythmias,  
27 heart failure, major following neurological abnormalities, atrial or ventricular fibrillation,  
28 kidney failure, or any adverse event related to pharmacological treatment that endangers the  
29 life or any organ of the participant's body. The objective of revealing the assignment by the  
30 study administrator will be to be able to warn the participant of a timely treatment  
31 according to the drugs ingested.  
32  
33  
34

### 35 **Participant timeline and intervention**

36 The inclusion of participants will be evaluated according to the eligibility criteria and by  
37 invitation. Volunteers who wish to participate in the study will be summoned the next day  
38 at a specialized office to carry out all the relevant studies to ensure the inclusion criteria.  
39 These include a medical history, anthropometric measurements such as weight and body  
40 mass index, electrocardiogram, hematic biometry, complete blood chemistry, and  
41 serological test for antibodies and RT-PCT for SARS-CoV-2. Volunteers will be asked for  
42 information to contact them once the serological results are obtained.  
43

44 Once the results are obtained (approximately 3 days), personnel eligible to participate in the  
45 study will be contacted. They will meet in a particular office to speak with a researcher who  
46 will be in charge of carrying out the eligibility criteria and medical history checklist. This  
47 researcher will be different from the one who makes the assignment, who delivers the  
48 medicine and the one who evaluates the results and performs the statistical analysis. The  
49 assignment of the group of each participant will be done through the Web, and the  
50 participant will not know the group they have been assigned. This information will be  
51 known for the researcher in charge, unrelated to the delivery of the treatment, results, or  
52 inclusion of the participant in the study. After the assignment, the volunteers will receive  
53 the assigned treatment at the pharmacy using a code in a sealed envelope assigned by the  
54 Web.  
55  
56  
57  
58  
59  
60

1  
2  
3 Participants who meet the inclusion criteria and there is no reason for exclusion will  
4 proceed to the second phase of group assignment with researcher B, the next business day  
5 at a different time or office than researcher A.

6 The group of researchers in charge of monitoring the participants, who will be blind to the  
7 group assignment at all times, will be in charge of assessing each participant's adverse  
8 event and treatment adherence record weekly. These follow-up researchers will be available  
9 24 hours a day throughout the week if participants experience undesirable adverse events  
10 that require urgent attention or that do not allow them to continue with drug treatment. If  
11 this latter situation happens, the researcher in charge of the follow-up will contact the study  
12 administrator to reveal to the treating physicians the treatment received by the participant.  
13 At the end of the first 30 days, a new RT-PCR will be requested from each participant. The  
14 same action will be carried out 60 days after the start of treatment for both groups. After 60  
15 days, the treatment will be suspended and the results of the RT-PCR samples for SARS-  
16 CoV-2 will be evaluated.  
17  
18  
19  
20  
21

## 22 **Outcome measures**

23 This study compares the efficacy of the use of hydroxychloroquine plus bromhexine vs. the  
24 exclusive use of bromhexine in prophylactic doses every 24 hours for 60 days in healthy  
25 health personnel exposed to the first line of care in confirmed patients with suspected  
26 infection by SARS-CoV-2.  
27

### 28 **Primary endpoint**

29 The primary endpoint will be the proportion of health personnel infected by SARS-CoV-2  
30 after seven days of posterior study's inclusion and up to 60 days after starting treatment, both  
31 the control and intervention group. The infection will be diagnosed using RT-PCR for  
32 SARS-CoV-2 after day 7 of the start of treatment. The period will be 60 days. The  
33 proportion of infected will be evaluated between the control and experimental group using  
34 relative risk (RR) and absolute risk increase (ARI) in the established time. The disease-free  
35 period in the 60 days will also be evaluated by analyzing the cumulative incidence of  
36 healthy patients, and the presence of confirmed infection by RT-PCR of SARS-CoV-2 will  
37 be the outcome. The censoring variable will be the discontinuation of treatment either due  
38 to death, adverse events, or any elimination criteria. Since there is the possibility of false  
39 positives and negatives, also of PCR, we will perform qualitative measurements of IgM and  
40 IgG with the Elecsys® Anti-SARS-CoV-2 test from Roche laboratories.  
41  
42  
43

### 44 **Secondary outcome**

## 45 **Secondary endpoints**

- 46  
47 ► The secondary outcome will be the proportion of health personnel infected by  
48 SARS-CoV-2 after seven days of study inclusion and up to 30 days after the start of  
49 treatment, both in the intervention and control group. The infection will be  
50 diagnosed using RT-PCR for SARS-CoV-2 after day 7 of the start of treatment. The  
51 period will be 30 days. The proportion of infected will be evaluated between the  
52 control and experimental group employing RR and ARI in the established time with  
53 their respective 95% confidence intervals. The disease-free period in the 30 days  
54 will also be evaluated by analyzing the cumulative incidence of healthy health  
55 personnel, and the presence of confirmed infection by RT-PCR of SARS-CoV-2  
56  
57  
58  
59

will be the outcome. The censoring variable will be the discontinuation of treatment either due to death, adverse events, or any elimination criteria.

- ▶ Another secondary endpoint will be adverse events, defined as the presence of any of the following during the study period: death, nausea, vomiting, abdominal pain, diarrhea, rash, itchy skin, hair loss, lengthening of the QT interval in the electrocardiogram (>500msec), corneal opacity, cardiac arrhythmias, heart failure or kidney failure (renal clearance <20ml/min). The proportion of the compound of adverse events between the experimental and control groups will be analyzed using RR and ARI for 60 days with their respective 95% confidence intervals.

The efficacy of the treatment will be established as the proportion of volunteers infected with SARS-CoV-2 in the intervention group compared with the control group. This difference should be sufficient to avoid overlapping of the 95% confidence intervals. It will be considered effective if the intervals do not overlap and ineffective if both groups have a proportion of infected whose confidence intervals overlap.

This type of evaluation will allow an adequate understanding of the efficacy of the treatment in both groups.

### **Handling and storage of data and documents**

Before the start of the study, the researchers in charge of the recruitment, assignment, and delivery of drugs will be trained to perform the task assigned to them at least 3 days before the start of the study.

Researcher A will assess the eligibility criteria of potential participants and perform a detailed clinical examination to assess whether they can participate in the study. The data that will be collected initially will be the following:

- ▶ Medical history (includes personal data): study identifier number, history number, name, date of birth, sex, occupation, marital status, nationality, current residence, degree of studies (primary, secondary, upper secondary, bachelor's degree, postgraduate), hospital service to which it belongs and the number of hours worked per week.
- ▶ Personal history: alcohol intake (yes/no; how many glasses of beer or alcoholic beverages do you consume per week), smoking habit (yes/ no; and number of cigarettes per day), drug use (yes/no), diet per week (dietary restrictions and number of meals per day) and number of hours of sleep per day.
- ▶ Gynecological history (in women): Number of pregnancies, number of live children, menarche, menopause.
- ▶ History of respiratory disease, history of gastrointestinal disease, nephrological, neurological, hematological, cardiovascular, allergic.
- ▶ Genetic family history, such as hypertension, diabetes, heart disease, kidney disease.
- ▶ Physical examination: blood pressure, heart rate, respiratory rate, temperature, weight, height, body mass index, skin lesions, head and neck inspection, respiratory inspection (chest symmetry, lung expansion, palpation of the bases and preserved vertices, lung percussion, auscultation for lung murmur, breath sounds). Cardiovascular inspection (palpation of the fifth intercostal space, auscultation of heart sounds, pulses that are palpable and symmetrical), abdominal inspection (palpation, percussion and auscultation of peristaltic sounds), neurological

1  
2  
3 evaluation (Glasgow, active motility, passive motility, reflex motility, cranial  
4 nerves, sensitivity).

- 5 ▶ Hematic biometry: Hematocrit, leukocytes, segmented (%), lymphocytes (%),  
6 monocytes (%), Mean corpuscular volume (MCV), platelets.  
7 ▶ Blood chemistry: Glycaemia, urea, creatinine, sodium, potassium, chlorine, GOT,  
8 GPT, alkaline phosphatase AF (FAL), total bilirubin.  
9 ▶ Muscle enzymes.  
10 ▶ Clotting times: Thrombin time (PT), Prothrombin time (PTT), International  
11 normalized ratio (INR).  
12 ▶ Electrocardiogram: rhythm, heart rate, heart axis, evaluation of P wave, PR interval,  
13 duration of QRS, QT interval, time of T wave. The electrocardiogram will be  
14 performed using an instrument calibrated and validated for its use internationally.  
15 ▶ Molecular test results for IgG antibodies and IgM serology:  
16 ▶ The FDA approved product called Cellex qSARS-CoV-2 IgG/IgM Rapid Test will  
17 be used for serological determination. The device cassette, sample, and buffer  
18 solution must be at room temperature. The sample (10 µL) is transferred to the  
19 center of the sample well. After the sample well is free of liquid, two drops of  
20 sample diluent are added. After fifteen to twenty minutes, read the test results.  
21 Results should not be read after twenty minutes.  
22 ▶ A positive IgM result occurs when a colored band appears on the M test line (M)  
23 and the control line (C) and indicates that IgM against SARS-CoV-2 is present.  
24 ▶ A positive IgG result occurs when a colored band appears on the G test line (G) and  
25 the control line (C) and indicates that IgG against SARS-CoV-2 is present.  
26 ▶ A positive result for IgM and IgG occurs when colored bands occur both M and G,  
27 as well as C.  
28 ▶ A negative result occurs when a colored band appears in C only and indicates that  
29 IgM and IgG antibodies against SARS-CoV-2 were not detected.  
30 ▶ An invalid result occurs when a color band is not produced in C, and the test must  
31 be repeated.  
32 ▶ Official RT-PCR results (carried out by “Instituto Nacional de Ciencias Médicas y  
33 Nutrición Salvador Zubirán”)

34  
35  
36  
37  
38  
39  
40 All this information will be collected in a pre-established medical history questionnaire for  
41 each potential participant. This information will be dumped into an online database  
42 registered on the CASTOR server in the United States of America.

43 The information obtained from the weekly assessment of adverse events, and the results of  
44 the RT-PCR for SARS-CoV-2 at 30 and 60 days after starting treatment will be entered into  
45 an online database. In order to ensure the quality of the data collection, the database will be  
46 built in CASTOR, a database on the Web that allows entering all the pre-defined data for  
47 each participant, thus reducing human error. This information will be stored on a server in  
48 the United States of America and can only be accessed by the study's administrator. The  
49 data may only be entered by a researcher in charge of collecting the data sheets and  
50 emptying them.  
51  
52

### 53 **Monitoring and quality assurance**

54 Every possible adverse event will be noted daily by the participants in the agenda that will  
55 be delivered to them. This agenda will be evaluated weekly by the researcher in charge who  
56  
57  
58  
59

1  
2  
3 monitoring the participants (who will be blind to the group assignment). In case of  
4 unbearable adverse events for the participants or that put their health at risk, an open line  
5 will be available 24 hours a day with direct communication to the researcher in charge of  
6 monitoring the study to report any event that requires hospitalization or immediate  
7 evaluation at the hospital. All participants with adverse events that put their life or health at  
8 risk may be urgently assessed by personnel from the National Institute of Medical Science  
9 and Nutrition "Salvador Zubirán" at the National Rehabilitation Institute and if possible by  
10 the same INR staff within the INR as part of the study. The patient follow-up investigator  
11 will immediately contact the study administrator to disclose the participant's assignment to  
12 treating physicians at that institution, but the assignment will never be disclosed to other  
13 investigators related to the study. All the study expenses and/or attention of collateral  
14 effects will be covered by the current cost of the financing SECTEI/061/2020.

15  
16 The audit will be carried out weekly, assessing adverse events, capturing data in the  
17 corresponding datasheets by the study administrator. Likewise, the data entered in the  
18 CASTOR web base will be valued to validate its quality. The paper data sheets must be  
19 kept in a special office dedicated to the study in folders separated by volunteers with the  
20 informed consent of each participant, the data of the medical history, laboratory results,  
21 eligibility criteria, adverse event sheet and results, molecular tests, as well as  
22 electrocardiogram. The letter of revocation of informed consent will also be protected if  
23 required. As part of the audit, an interim analysis will be carried out 30 days after the study  
24 starts to assess the possible adverse effects and whether these outweigh the potential  
25 benefits of the intervention. In the adverse event outweigh the potential benefits,  
26 termination of the study will be assessed. The approval of the research ethics committee of  
27 the National Institute of Rehabilitation of Mexico will be sought.

### 31 **Statistical analysis**

32  
33 The data analysis will be carried out by intention to treat, which means that each participant  
34 will be analyzed according to the group assigned regardless of whether they modified their  
35 treatment. The study variables will be divided according to the allocation group  
36 (intervention and control). The distribution of continuous variables will be assessed using  
37 the Shapiro Wilk test and Skewness and kurtosis. The variables of normal distribution will  
38 be compared using the Student's t-test, free distribution using the Mann-Whitney U test.  
39 Categorical variables will be evaluated using the Chi-square test.

40  
41 The primary objective will be expressed in number and proportion for each group. The  
42 relative risk will be obtained as the division between the proportion of primary outcomes in  
43 the intervention group by the proportion of primary outcomes in the control group. It will  
44 be expressed as RR with its respective 95% confidence interval for the initial time, which is  
45 60 days. Likewise, the result will be expressed as absolute risk, which will be derived from  
46 the proportion of the primary outcome in the intervention group minus the proportion of the  
47 primary outcome in the control group. Secondly, the primary objective will be analyzed  
48 with the non-parametric estimate of the survival and risk function using Kaplan-Meier  
49 curves for 60 days according to the allocation group. The primary endpoint will be SARS-  
50 CoV-2 infection within the 60-day period, and the silencing variable will be dropping out  
51 of the study for any reason. The comparison of the survival curves between both groups  
52 will be carried out using the log-rank test. To adjust the primary objective to possible  
53 confounders such as age, sex, and service in that volunteer works, body mass index, etc.

1  
2  
3 Multiple regression will be performed using the Cox model to determine the adjusted  
4 primary endpoint hazard ratio.

5 For secondary outcomes such as the analysis at 30 days, the same statistical analysis  
6 expressed in RR and absolute risk will be used. Survival analysis will be used for the  
7 primary endpoint only.

8 An interim statistical analysis will be performed 30 days after the study starts to assess  
9 possible adverse effects and the efficacy of the intervention.

10 The study administrator will be the only one with access to the data. For the interim  
11 analysis and the final analysis, the administrator will export the data to Excel format to be  
12 analyzed by the study statistician blindly to the assignment of groups, participants, or  
13 results.  
14  
15

### 16 17 **AEs, SAEs and SUSARs**

18 By requiring the use of drugs, the participant will be exposed to risks inherent to the drug  
19 used, ranging from mild to severe or death. Any unexpected risks that may occur during the  
20 study will be immediately explained to the participants and the ethics committee. Any  
21 adverse event will be compiled and will not be disclosed under any condition to anyone  
22 other than the study administrator, treating physicians in case of severe care and the ethics  
23 committee. Besides, the results will be completely anonymous concerning the names of the  
24 participants. The results will be compiled and reported as combined collective data.  
25  
26  
27

### 28 29 **Patient and public involvement**

30 Patients were not involved in the development of this research. However, the results of the  
31 study will be communicated to the study participants by sending the end product (article) to  
32 the provided email address.  
33

### 34 35 **ETHICS, DISSEMINATION AND SAFETY MONITORING**

36 In case of damage, adverse events or complications derived from the study, participants  
37 will be assured attention by the staff of the National Institute of Medical Science and  
38 Nutrition "Salvador Zubirán" in an enclosure that ensures the safety of the participant, not  
39 subjecting volunteers to a higher risk of contamination. This care will be extended until  
40 adverse events are resolved. In case of no adverse events during the study, medical  
41 attention will be extended at the aforementioned institute until 15 days after the end of the  
42 study.  
43

44 The protocol is approved by the local medical ethical review committee at the National  
45 Institute of Rehabilitation, Luis Guillermo Ibarra Ibarra with the internal number  
46 INRLGII/25/20. Definitions of Research Risk Regulation of the General Health Law on  
47 Research for Health (in Spanish, Reglamento de la Ley General de Salud en Materia de  
48 Investigación para la Salud) [http://www.inr.gob.mx/Descargas/Investigacion/Reglamentos-](http://www.inr.gob.mx/Descargas/Investigacion/Reglamentos-LGS-Materia-Investigacion-Salud.pdf)  
49 [LGS-Materia-Investigacion-Salud.pdf](http://www.inr.gob.mx/Descargas/Investigacion/Reglamentos-LGS-Materia-Investigacion-Salud.pdf). ARTICLE 17; and by The Federal Commission for  
50 Protection against Sanitary Risk (in Spanish, Comisión Federal para la Protección contra  
51 Riesgos Sanitarios, COFEPRIS) approval number 203300410A0058/2020.

52 The study's results will be published in journals of worldwide impact affiliated with the  
53 Journal Citation Reports (JCR). Likewise, the results of the study will be disseminated in  
54 national and international media, exposed in international and national congresses,  
55  
56  
57  
58  
59

1  
2  
3 communicated to CONACYT, and recorded in Clinicaltrials.gov according to the study  
4 identifier number.

5 The help of non-profit organizations will be sought to disseminate the results of the  
6 investigation to interest groups.

7  
8 The complete protocol will be published on Clinicaltrials.gov and the OSF - Center for  
9 Open Science platform <https://osf.io/>. Where a DOI will be assigned, and the amendments  
10 made to the original protocol will be assessed.

11 Amendments to the protocol may be made before the start of the study and during the  
12 study. Any amendment to the protocol will be clarified and posted on Clinicaltrials.gov  
13 under the same identifier as this study. Likewise, any amendment will be sent to the ethics  
14 committee of the same hospital.  
15

16  
17 **Acknowledgements** We thank to SECTEI/061/2020 grant  
18

19 Contributors Study concept and design were conducted by author JGM. Advanced  
20 statistical input was given by author RJMP Critical revision of concept and design and  
21 intellectual input in the study protocol were done by authors, Study supervision and  
22 coordination were conducted by authors EHL and JGM Manuscript revision and editing  
23 was done by RAG and NML.  
24  
25  
26

27 **Funding** The protocol was peer reviewed to obtain funding from Mexico City Government,  
28 Grant Number SECTEI/061/2020. Clinical Trials registration number NCT04340349.  
29  
30  
31

32 **Competing interest**, the study is conducted by the department of Epidemiology at the  
33 National Institute of Rehabilitation Luis Guillermo Ibarra Ibarra, as stated above in the  
34 funding section, an unrestricted grant from SECTEI/061/2020 was provided for the conduct  
35 of the trial.  
36  
37

38 **Declaration of interests** No one of the researchers presents a conflict of interest or has  
39 commercial agreements, or receives financial compensation from any commercial or  
40 pharmaceutical company.  
41  
42

43 **Patient and public involvement** Patients and/or the public were not involved in the design,  
44 or conduct, or reporting, or dissemination plans of this research.  
45

46 **Patient consent for publication** Not required  
47

48 **Provenance and peer review**, externally peer reviewed  
49

50  
51 **Open access**  
52

53 **ORCID ID**  
54

55 **Julio Granados-Montiel** <https://orcid.org/0000-0002-0611-6421>  
56  
57  
58  
59  
60

## REFERENCES

1. Coronaviridae Study Group of the International Committee on Taxonomy of Viruses. The species Severe acute respiratory syndrome-related coronavirus: classifying 2019-nCoV and naming it SARS-CoV-2. *Nat Microbiol* 2020;5:536–44.
2. WHO Timeline - COVID-19 [Internet]. [cited 2020 Apr 15]. Available from: <https://www.who.int/news-room/detail/08-04-2020-who-timeline---covid-19>
3. WHO COVID-19 Dashboard [Internet]. [cited 2020 Apr 15]. Available from: <https://covid19.who.int/>
4. COVID-19 Dashboard México [Internet]. COVID - 19 Dashboard México. [cited 2020 Apr 15]. Available from: <https://datos.covid-19.conacyt.mx/index.php>
5. Guan W-J, Ni Z-Y, Hu Y, et al. Clinical characteristics of Coronavirus disease 2019 in China. *N Engl J Med* 2020;382:1708-20.
6. Li C, Ji F, Wang L, et al. Asymptomatic and human-to-human transmission of SARS-CoV-2 in a 2-Family cluster, Xuzhou, China. *Emerg Infect Dis* 2020;26:1626-28.
7. Hindson J. COVID-19: faecal-oral transmission? *Nat Rev Gastroenterol Hepatol* 2020;17:259.
8. Zhang S, Diao M, Yu W, et al. Estimation of the reproductive number of novel coronavirus (COVID-19) and the probable outbreak size on the Diamond Princess cruise ship: A data-driven analysis. *Int J Infect Dis* 2020;93:201-4.
9. Liu Y, Gayle AA, Wilder-Smith A, et al. The reproductive number of COVID-19 is higher compared to SARS coronavirus. *J Travel Med* 2020;13:27(2).
10. Xu H, Zhong L, Deng J, et al. High expression of ACE2 receptor of 2019-nCoV on the epithelial cells of oral mucosa. *Int J Oral Sci* 2020;12:8.
11. Levy A, Yagil Y, Bursztyn M, et al. ACE2 expression and activity are enhanced during pregnancy. *Am J Physiol Regul Integr Comp Physiol* 2008;295:R1953–61.
12. Baig AM, Khaleeq A, Ali U, et al. Evidence of the COVID-19 virus targeting the CNS: tissue distribution, host-virus interaction, and proposed neurotropic mechanisms. *ACS Chem Neurosci* 2020;11:995–8.



- 1  
2  
3 13. Wu Z, McGoogan JM. Characteristics of and important lessons from  
4 the Coronavirus disease 2019 (COVID-19) outbreak in China: Summary of a report  
5 of 72 314 cases from the Chinese Center for Disease Control and Prevention.  
6 *JAMA* 2020;323:1239-42.  
7  
8  
9 14. Zhan M, Qin Y, Xue X, et al. Death from Covid-19 of 23 health care  
10 workers in China. *N Engl J Med* 2020;382:2267-8.  
11  
12 15. Remuzzi A, Remuzzi G. COVID-19 and Italy: what next? *Lancet*  
13 2020;395:1225-8.  
14  
15  
16 16. Wang M, Cao R, Zhang L, et al. Remdesivir and chloroquine  
17 effectively inhibit the recently emerged novel coronavirus (2019-nCoV) in vitro. *Cell*  
18 *Res* 2020;30:269–71.  
19  
20  
21 17. Gao J, Tian Z, Yang X. Breakthrough: Chloroquine phosphate has  
22 shown apparent efficacy in treatment of COVID-19 associated pneumonia in  
23 clinical studies. *Biosci Trends* 2020;14:72–3.  
24  
25  
26 18. Page RL 2nd, O’Bryant CL, Cheng D, et al. Drugs that may cause or  
27 exacerbate heart failure: a scientific statement from the American Heart  
28 Association. *Circulation* 2016;134:e32–69.  
29  
30  
31 19. Tönnesmann E, Kandolf R, Lewalter T. Chloroquine cardiomyopathy -  
32 a review of the literature. *Immunopharmacol Immunotoxicol* 2013;35:434–42.  
33  
34  
35 20. Zanasi A, Mazzolini M, Kantar A. A reappraisal of the mucoactive  
36 activity and clinical efficacy of bromhexine. *Multidiscip Respir Med* 2017;20:12:7.  
37  
38 21. Depfenhart M, de Villiers D, Lemperle G, et al. Potential new treatment  
39 strategies for COVID-19: is there a role for bromhexine as add-on therapy? *Intern*  
40 *Emerg Med* 2020;15:801-812.  
41  
42 22. Hoffmann M, Kleine-Weber H, Schroeder S, et al. SARS-CoV-2 cell entry  
43 depends on ACE2 and TMPRSS2 and is blocked by a clinically proven protease  
44 inhibitor. *Cell* 2020;181:271-280.e8  
45  
46  
47  
48  
49  
50  
51  
52  
53  
54  
55  
56  
57  
58  
59  
60

# BMJ Open

## New prophylaxis regimen for SARS-CoV-2 infection in health professionals with low doses of Hydroxychloroquine and Bromhexine. A randomized, double-blind placebo clinical trial (ELEVATE Trial).

|                                 |                                                                                                                                                                                                                                                                                                                                                                                                                                                                                                                                                                                                                                                                                                                                                                                                                                                                                                                                                                                                                                                                                                                                                                                                                                                                                                                                                                                                          |
|---------------------------------|----------------------------------------------------------------------------------------------------------------------------------------------------------------------------------------------------------------------------------------------------------------------------------------------------------------------------------------------------------------------------------------------------------------------------------------------------------------------------------------------------------------------------------------------------------------------------------------------------------------------------------------------------------------------------------------------------------------------------------------------------------------------------------------------------------------------------------------------------------------------------------------------------------------------------------------------------------------------------------------------------------------------------------------------------------------------------------------------------------------------------------------------------------------------------------------------------------------------------------------------------------------------------------------------------------------------------------------------------------------------------------------------------------|
| Journal:                        | <i>BMJ Open</i>                                                                                                                                                                                                                                                                                                                                                                                                                                                                                                                                                                                                                                                                                                                                                                                                                                                                                                                                                                                                                                                                                                                                                                                                                                                                                                                                                                                          |
| Manuscript ID                   | bmjopen-2020-045190.R1                                                                                                                                                                                                                                                                                                                                                                                                                                                                                                                                                                                                                                                                                                                                                                                                                                                                                                                                                                                                                                                                                                                                                                                                                                                                                                                                                                                   |
| Article Type:                   | Protocol                                                                                                                                                                                                                                                                                                                                                                                                                                                                                                                                                                                                                                                                                                                                                                                                                                                                                                                                                                                                                                                                                                                                                                                                                                                                                                                                                                                                 |
| Date Submitted by the Author:   | 28-Dec-2020                                                                                                                                                                                                                                                                                                                                                                                                                                                                                                                                                                                                                                                                                                                                                                                                                                                                                                                                                                                                                                                                                                                                                                                                                                                                                                                                                                                              |
| Complete List of Authors:       | <p>GRANADOS-MONTIEL, JULIO; Instituto Nacional de Rehabilitacion Luis Guillermo Ibarra Ibarra, Tissue Engineering and Regenerative Medicine Unit</p> <p>Hazan-Lasri, Eric; Instituto Nacional de Rehabilitacion Luis Guillermo Ibarra Ibarra, Division of Traumatology, Emergencies and Bone Infections</p> <p>Franco-Cendejas, Rafael; Instituto Nacional de Rehabilitacion Luis Guillermo Ibarra Ibarra, Infectology Laboratory</p> <p>Chavez-Heres, Tatiana; Instituto Nacional de Rehabilitacion Luis Guillermo Ibarra Ibarra, Service, Hospital Epidemiological Surveillance Unit</p> <p>Silva-Bermudez, Phaedra; Instituto Nacional de Rehabilitacion Luis Guillermo Ibarra Ibarra, Tissue Engineering and Regenerative Medicine Unit</p> <p>Aguilar-Gaytan, Rocio; Instituto Nacional de Rehabilitacion Luis Guillermo Ibarra Ibarra, Tissue Engineering and Regenerative Medicine Unit</p> <p>Manzano-Leon, Natalia; Instituto Nacional de Cancerologia, Basic Division Research</p> <p>Méndez-Maldonado, Karla; Instituto Nacional de Rehabilitacion Luis Guillermo Ibarra Ibarra, Tissue Engineering and Regenerative Medicine Unit</p> <p>Alvarez-Arce, Alejandro; Instituto Nacional de Rehabilitación Luis Guillermo Ibarra Ibarra, Tissue Engineering and Regenerative Medicine Unit</p> <p>Martinez-Portilla, Raigam ; National Institute of Perinatology, Clinical research division</p> |
| <b>Primary Subject Heading</b>: | Health services research                                                                                                                                                                                                                                                                                                                                                                                                                                                                                                                                                                                                                                                                                                                                                                                                                                                                                                                                                                                                                                                                                                                                                                                                                                                                                                                                                                                 |
| Secondary Subject Heading:      | Evidence based practice, Global health, Medical publishing and peer review                                                                                                                                                                                                                                                                                                                                                                                                                                                                                                                                                                                                                                                                                                                                                                                                                                                                                                                                                                                                                                                                                                                                                                                                                                                                                                                               |
| Keywords:                       | INFECTIOUS DISEASES, PREVENTIVE MEDICINE, Clinical trials < THERAPEUTICS, COVID-19, CLINICAL PHARMACOLOGY                                                                                                                                                                                                                                                                                                                                                                                                                                                                                                                                                                                                                                                                                                                                                                                                                                                                                                                                                                                                                                                                                                                                                                                                                                                                                                |
|                                 |                                                                                                                                                                                                                                                                                                                                                                                                                                                                                                                                                                                                                                                                                                                                                                                                                                                                                                                                                                                                                                                                                                                                                                                                                                                                                                                                                                                                          |

1  
2  
3  
4  
5  
6  
7  
8  
9  
10  
11  
12  
13  
14  
15  
16  
17  
18  
19  
20  
21  
22  
23  
24  
25  
26  
27  
28  
29  
30  
31  
32  
33  
34  
35  
36  
37  
38  
39  
40  
41  
42  
43  
44  
45  
46  
47  
48  
49  
50  
51  
52  
53  
54  
55  
56  
57  
58  
59  
60

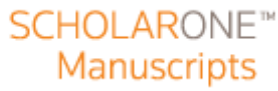



I, the Submitting Author has the right to grant and does grant on behalf of all authors of the Work (as defined in the below author licence), an exclusive licence and/or a non-exclusive licence for contributions from authors who are: i) UK Crown employees; ii) where BMJ has agreed a CC-BY licence shall apply, and/or iii) in accordance with the terms applicable for US Federal Government officers or employees acting as part of their official duties; on a worldwide, perpetual, irrevocable, royalty-free basis to BMJ Publishing Group Ltd ("BMJ") its licensees and where the relevant Journal is co-owned by BMJ to the co-owners of the Journal, to publish the Work in this journal and any other BMJ products and to exploit all rights, as set out in our [licence](#).

The Submitting Author accepts and understands that any supply made under these terms is made by BMJ to the Submitting Author unless you are acting as an employee on behalf of your employer or a postgraduate student of an affiliated institution which is paying any applicable article publishing charge ("APC") for Open Access articles. Where the Submitting Author wishes to make the Work available on an Open Access basis (and intends to pay the relevant APC), the terms of reuse of such Open Access shall be governed by a Creative Commons licence – details of these licences and which [Creative Commons](#) licence will apply to this Work are set out in our licence referred to above.

Other than as permitted in any relevant BMJ Author's Self Archiving Policies, I confirm this Work has not been accepted for publication elsewhere, is not being considered for publication elsewhere and does not duplicate material already published. I confirm all authors consent to publication of this Work and authorise the granting of this licence.

1  
2  
3 1 **New prophylaxis regimen for SARS-CoV-2 infection in health professionals with low doses of**  
4  
5 2 **Hydroxychloroquine and Bromhexine: a randomized, double-blind placebo clinical trial**  
6  
7  
8 3 **(ELEVATE Trial).**  
9

10 4 Julio Granados-Montiel<sup>1\*</sup>, Eric Joseph Hazan Lasri<sup>2</sup>, Rafael Franco Cendejas<sup>3</sup>, Tatiana Chávez Heres<sup>4</sup>,  
11  
12 5 Phaedra Suriel Silva Bermúdez<sup>1</sup>, Rocío Aguilar Gaytán<sup>1</sup>, Natalia Manzano-León<sup>5</sup>, Karla Méndez-  
13  
14 6 Maldonado<sup>1</sup>, Alejandro Alvarez-Arce<sup>1</sup>, Raigam J. Martinez-Portilla<sup>6</sup>  
15  
16  
17 7

18  
19 8 <sup>1</sup> Tissue Engineering and Regenerative Medicine Unit. National Institute of Rehabilitation. Mexico City, Mexico.  
20

21 9 <sup>2</sup> Division of Traumatology, Emergencies and Bone Infections. National Institute of Rehabilitation. Mexico City,  
22  
23 10 Mexico.  
24

25 11 <sup>3</sup> Infectology Laboratory. National Institute of Rehabilitation. Mexico City, Mexico.  
26

27 12 <sup>4</sup> Service, Hospital Epidemiological Surveillance Unit. National Institute of Rehabilitation. Mexico City, Mexico.  
28  
29

30 13 <sup>5</sup> Basic Division Research, National Institute of Cancerology. Mexico City, Mexico.  
31

32 14 <sup>6</sup> Barcelona Centre for Maternal-Fetal and Neonatal Medicine (Hospital Clínic and Hospital Sant Joan de Déu),  
33  
34 15 Institut d'Investigacions Biomèdiques August Pi i Sunyer (IDIBAPS), Universitat de Barcelona, Centre for  
35  
36 16 Biomedical Research on Rare Diseases (CIBER-ER), Barcelona, Spain.  
37  
38 17

39  
40 18 \*Corresponding author

41 19 Julio Granados-Montiel. M.D.& Ph.D.  
42

43 20 Tissue Engineering and Regenerative Medicine Unit. National Institute of Rehabilitation  
44

45 21 Av. México-Xochimilco 289. Col. Arenal de Guadalupe, Tlalpan. 14389, Mexico City, Mexico.  
46  
47

48 22 ORCID ID: 0000-0002-0611-6421  
49

50 23 [juliogram@gmail.com](mailto:juliogram@gmail.com)  
51  
52  
53  
54 24

1  
2  
3 25 **Keywords:** prophylaxis, SARS-CoV-2, COVID-19, health workers, hydroxychloroquine, bromhexine.  
4  
5  
6 26  
7  
8 27  
9

10 28 **Word count:** 5,423  
11  
12  
13  
14  
15  
16  
17  
18  
19  
20  
21  
22  
23  
24  
25  
26  
27  
28  
29  
30  
31  
32  
33  
34  
35  
36  
37  
38  
39  
40  
41  
42  
43  
44  
45  
46  
47  
48  
49  
50  
51  
52  
53  
54  
55  
56  
57  
58  
59  
60

## 29 ABSTRACT

30 **Introduction:** SARS-CoV-2 infection in Mexico has caused ~1 million confirmed cases; around 20-25%  
31 of health workers will be infected by the virus at their workplace, with approximately 4.4% of mortality.  
32 High infectivity of SARS-CoV-2 is related with cell entry mechanism, through the angiotensin-converting  
33 enzyme (ACE) receptor. SARS-CoV-2 requires transmembrane protease serine 2 (TMPRSS2) to cleave  
34 its spike glycoprotein and ensure fusion of host cell and virus membrane. We propose studying  
35 prophylactic treatment with hydroxychloroquine (HCQ) and bromhexine (BHH), which have been shown  
36 to be effective in preventing SARS-CoV-2 infection progression when administered in early stages. The  
37 aim of this study is to assess the efficacy of HCQ and BHH as prophylactic treatments for SARS-CoV-2  
38 infection in healthy health workers exposed to the virus.

39 **Methods and analysis:** Double-blind randomized clinical trial, with parallel allocation at a 1:1 ratio with  
40 placebo, of low doses of HCQ and BHH, for 60 days. Study groups will be defined as follows: 1) HCQ  
41 200mg/d + BHH placebo; 2) BHH 8mg/8h + HCQ placebo; 3) HCQ 200mg/d + BHH 8mg/8h; and 4)  
42 HCQ placebo + BHH placebo. Primary endpoint will be efficacy of the interventions, determined by  
43 differences in the proportions of infected personnel. At least a 16% reduction in absolute risk is expected  
44 between the double intervention and double placebo groups; a minimum of 20% infection is expected in  
45 the placebo group. The sample size calculation estimated a total of 280 patients assigned: four groups of  
46 70 participants each.

47 **Ethics and dissemination:** This protocol has been approved by the local Medical Ethics Committee  
48 (National Institute of Rehabilitation 'Luis Guillermo Ibarra Ibarra', approval number INRLGII/25/20) and  
49 by the Federal Commission for Protection against Sanitary Risks (COFEPRIS, approval number  
50 203300410A0058/2020). The results of the study will be submitted for publication in peer-reviewed  
51 journals and disseminated through conferences.

1  
2  
3 52 **Trial registration number:** NCT04340349.  
4  
5  
6 53

## 7 8 54 **STRENGTHS AND LIMITATIONS OF THIS STUDY**

### 9 10 55 *Strengths*

- 12  
13 56 ▶ This is a double-blind randomized single-centre clinical trial, involving low doses of  
14  
15 57 hydroxychloroquine and bromhexine, adequately powered to provide clinically relevant  
16  
17 58 information regarding prophylactic treatment for SARS-CoV-2 infection in health care personnel.
- 18  
19  
20 59 ▶ This study will include 280 participants who are health workers exposed to SARS-CoV-2 patients  
21  
22 60 with suspected or confirmed infection, with short term follow-up (60 days).
- 23  
24 61 ▶ A study of prophylactic treatment in this population is of great value and could provide the basis  
25  
26 62 for protecting medical personnel around the world.
- 27  
28  
29 63 ▶ Both drugs proposed for this study have minimal side effects and are commercially available  
30  
31 64 worldwide; findings could be applied in a timely fashion in different regions.

### 32 33 65 *Limitations*

- 34  
35  
36 66 ▶ None of the proposed drugs have proven to be effective as a treatment for symptomatic SARS-  
37  
38 67 CoV-2 infected patients.



## 74 INTRODUCTION

75 On December 31, 2019, an outbreak of 27 pneumonia cases of unknown aetiology was reported in Wuhan,  
76 Hubei province, China<sup>1</sup>. A week later, the agent that caused the outbreak was identified as a new virus of  
77 the Coronaviridae family, being designated as a “severe acute respiratory syndrome coronavirus 2”  
78 (SARS-CoV-2) by the International Committee on Taxonomy of Viruses<sup>2 3</sup>. Affection caused by this  
79 virus, coronavirus disease 2019 (COVID-19), has become a pandemic, implying the biggest health-related  
80 battle in recent years. In Mexico, up to December 2020, have been produced more than 1 million  
81 confirmed cases and ~130,000 deaths, according to WHO data<sup>4</sup>. The age group ranging between 30 and  
82 79 years is the most highly affected, where 81% present mild symptoms, 14% severe and 5% critical,  
83 requiring intensive care unit management.

84 SARS-CoV-2 is a single-stranded RNA virion, member of the *Betacoronavirus* genus<sup>5</sup>. SARS-CoV-2 has  
85 an incubation period between 3 to 10 days, with different incubation periods related with different clinical  
86 symptoms<sup>6 7</sup>. It is transmitted through respiratory droplets from infected humans through contact with  
87 contaminated fomites and aerosols; on the other hand, asymptomatic patients in close contact can transmit  
88 the disease<sup>8</sup>. The mechanism through which the virus infects the respiratory cell is due to the angiotensin-  
89 converting enzyme protein 2 (ACE-2). This receptor is found in multiple tissues such as the oral cavity,  
90 brain, kidneys, intestine, and placenta<sup>9-11</sup>.

91 Health personnel is not exempt from contracting the disease. In China, it was reported that 3.5-4.4% of  
92 the infected population belonged to this group, and 14.8% presented characteristics of severity or critical  
93 illness<sup>7 12 13</sup>. In Italy, around 20% of healthcare professionals became infected<sup>14</sup>; mean age of health  
94 workers who died was 55 years (range of 29-72 years) and mean period from hospital admission to death  
95 was 19 days, (range 1-47 days)<sup>12</sup>.

1  
2  
3 96 Treatment of the SARS-Cov-2 infection has led different research groups to work on the development of  
4  
5 97 vaccines. However, the use of vaccines can be a challenge. Early trials have shown minimal immune  
6  
7  
8 98 protection or long-term protection is low. On the other hand, because the virus is RNA and the mutation  
9  
10 99 rate is high, we can expect new variants that reduce or nullify the effectiveness of vaccines. Therefore, it  
11  
12 100 is not known if the vaccines that are now in the phase end of the clinical study and those that are  
13  
14  
15 101 administered will work with the same efficacy for the SARS-CoV-2 virus that gave rise to Covid-19.  
16  
17 102 Therefore, it is important to develop a pharmacological strategy that allows the use of prophylactic drugs  
18  
19 103 for the prevention of SARS-CoV-2 infection.

20  
21  
22 104 Chloroquine (CQ) and Hydroxychloroquine (HCQ) are known as an antimalarial agents; HCQ is a  
23  
24 105 hydroxylated derivative from CQ. HCQ has been used in several viral infections, for example, as  
25  
26 106 replication inhibitor for the dengue virus, decreasing *in vitro* virus infection and promoting activation of  
27  
28 107 different immunological signal pathways<sup>15</sup>. It has also been used to treat patients infected with hepatitis  
29  
30  
31 108 C virus decreasing viral load, with minimal adverse effects reported<sup>16</sup>. HCQ has been reported to block  
32  
33 109 viral infection by increasing the endosomal pH required for virus fusion to the cell, as well as interfere  
34  
35 110 with SARS-CoV-2 cell receptors, through inhibition of ACE2 glycosylation receptor<sup>17 18 19 20</sup>. HCQ has  
36  
37  
38 111 immunomodulatory effects; it inhibits production and release of pro-inflammatory cytokines, that are  
39  
40 112 associated with severe disease development<sup>21 22</sup>. Recently, it has been reported that HCQ works as a  
41  
42 113 autophagy inhibitor, interfering with viral infection and replication<sup>23</sup>. There is recent evidence that HCQ  
43  
44  
45 114 could be used to treat COVID-19; studies in high-risk patients show that the use of HCQ was associated  
46  
47 115 with a lower risk of intubation or death<sup>24</sup>. Finally, a recent study showed that pre-treatment with HCQ has  
48  
49 116 shown a better effect on antiviral activity<sup>19</sup>.

1  
2  
3 118 Another pharmacological option to treat SARS-CoV-2 infection is Bromhexine (BHH). BHH modifies  
4  
5  
6 119 the composition of mucus, increases ciliary clearance and decreases coughing, improving respiratory  
7  
8 120 symptoms. It has also been reported to enhance the effects of some antibiotics<sup>25</sup>. The mechanism by which  
9  
10 121 SARS-CoV-2 enters human cells depends on the ACE-2 receptor and the human transmembrane serine  
11  
12 122 protease (TMPRSS2), on which BHH has a specific inhibitory effect<sup>26 27</sup>. BHH has been used to treat  
13  
14  
15 123 pneumonic damage in both lungs during early infection<sup>28</sup>. BHH turns out to be an ideal candidate for  
16  
17 124 SARS-CoV-2 treatment, since it has few contraindications, and its side effects are minimal, demonstrating  
18  
19 125 an extensive margin of pharmacological safety. BHH is widely available over the counter, and its low cost  
20  
21  
22 126 makes it an ideal therapeutic option.

23  
24 127 According to a letter published in the New England Journal of Medicine, of 77,262 patients infected by  
25  
26 128 SARS-CoV-2, 3387 (4.4%) were health workers<sup>12</sup>. Of these, 23 have died from this disease. The  
27  
28  
29 129 prevalence of infections in health personnel is alarming since health services in first world countries have  
30  
31 130 been overwhelmed by this disease. In Italy, around 20% of health professionals had a SARS-CoV-2  
32  
33 131 infection<sup>14</sup>. Faced with a highly contagious disease, the care of health workers, who are first line of contact  
34  
35 132 and on whom the health system of each country depends, is essential. This research regarding the use of  
36  
37  
38 133 HCQ and BHH in health personnel will allow us to determine and compare the effectiveness of both  
39  
40 134 interventions, which is of vital importance to clarify whether these treatments may prevent the appearance  
41  
42 135 of infection in this population. Describing for the first time that HCQ and/or BHH could function for  
43  
44  
45 136 disease prevention, would allow us to provide prophylaxis to health professionals worldwide. Therefore,  
46  
47 137 the use of HCQ and BHH in healthy health personnel exposed in patients with confirmed or suspected  
48  
49 138 SARS-CoV-2 will significantly reduce infection.

50  
51  
52 139

## 53 54 140 **METHODS AND ANALYSIS**

55  
56  
57  
58  
59  
60

## 141 **Study design**

142 Double-blind randomized clinical trial, with parallel allocation at a 1:1 ratio with placebo, of low doses of  
143 HCQ and BHH, for 60 days, to determine the efficacy of low-dose HCQ and/or BHH for the prevention  
144 of SARS-CoV-2 infection in healthcare workers.

## 146 **Participants**

147 The study will be carried out at the “Instituto Nacional de Rehabilitación, Luis Guillermo Ibarra Ibarra”  
148 (INR-LGII). This institution is a tertiary hospital that at this time has not been designated as a COVID-19  
149 centre. The Mexican government defined 3 phases to determine risk for SARS-CoV-2 infection: imported  
150 cases from outside Mexico; community infection and spread of the disease throughout the country (also  
151 known as Phase 3). In the latter, it is assumed that every person who enters a hospital is a potentially  
152 infected carrier; currently our centre is in Phase 3. Likewise, health personnel who work at the “Instituto  
153 Nacional de Ciencias Médicas y Nutrición, Salvador Zubirán” (INCMNSZ), which is a COVID-19  
154 designated tertiary centre, and who meet inclusion criteria of the protocol will be invited to participate in  
155 the study.

156 Inclusion of participants will be assessed according to the eligibility criteria. **Table 1** shows the  
157 classification and characteristics of study variables. Continuous variables will be assessed for normality.  
158 Variables with a normal distribution will be compared using Student's *t*-test, non-parametric variables  
159 using the Mann-Whitney U-test. Categorical variables will be evaluated using the Chi-squared test.

### 160 *Inclusion criteria*

- 161 ► Health personnel working at INR LGII or INCMNSZ who wish to participate in the study and  
162 sign the informed consent.
- 163 ► Over 18 and under 60 years of age, both genders.

1  
2  
3  
4  
5  
6  
7  
8  
9  
10  
11  
12  
13  
14  
15  
16  
17  
18  
19  
20  
21  
22  
23  
24  
25  
26  
27  
28  
29  
30  
31  
32  
33  
34  
35  
36  
37  
38  
39  
40  
41  
42  
43  
44  
45  
46  
47  
48  
49  
50  
51  
52  
53  
54  
55  
56  
57  
58  
59  
60

164 ▶ Exposition or caring for patients with suspected or confirmed SARS-CoV-2 infection.

165 ▶ Normal electrocardiogram.

*Exclusion criteria*

167 ▶ Positive quantitative reverse transcriptase-polymerase chain reaction (qRT-PCR) test for  
168 SARS-CoV-2 at the time of inclusion.

169 ▶ Panel of IgG or IgM antibodies positive for SARS-CoV-2 at the time of inclusion.

170 ▶ Development of respiratory symptoms suspicious of SARS-CoV-2 infection during the first 7  
171 days after treatment is initiated, confirmed by qRT-PCR.

172 ▶ Health personnel with comorbidities such as diabetes, hypertension, autoimmune diseases (i.e.,  
173 porphyria, psoriasis, systemic lupus erythematosus), obesity (defined as body mass index  $\geq 30$ ),  
174 cardiovascular diseases, respiratory diseases (such as asthma, chronic bronchitis, idiopathic  
175 pulmonary fibrosis).

176 ▶ History of allergies to any hydroxychloroquine or bromhexine related compound or  
177 medication.

178 ▶ Use of immunosuppressors for any reason.

179 ▶ History of bone marrow transplant.

180 ▶ Known glucose-6-phosphate dehydrogenase deficiency.

181 ▶ Chronic kidney disease or glomerular filtration  $< 20$  ml/min.

182 ▶ Use of other drugs with reported pharmacological interactions (i.e., digitalis, flecainide,  
183 amiodarone, procainamide, or propafenone).

184 ▶ History of long QT syndrome.

185 ▶ Electrocardiogram with QTc  $> 500$  msec.

186 ▶ Pregnant or breastfeeding personnel.

187 ▶ Epilepsy.

188 ▶ Known liver disease.

189 *Elimination criteria*

190 ▶ Personnel who decide to leave the study for any reason not related to adverse events.

191 ▶ Personnel with incomplete information on the primary outcome (qRT-PCR for SARS-CoV-2).

192 ▶ Personnel who are relocated to work in another institution.

193 ▶ Personnel who do not wish to perform consecutive sample analysis for SARS-CoV-2 at 30 and  
194 60 days after the start of pharmacological treatment.

195 **Table 1.** Classification and characteristics of study variables.

| Variable        | Conceptual definition                                                               | Operational definition                                                                                                          | Type                       |
|-----------------|-------------------------------------------------------------------------------------|---------------------------------------------------------------------------------------------------------------------------------|----------------------------|
| Age             | Date at recruitment minus date of birth                                             | Years of age                                                                                                                    | Quantitative               |
| Gender          | Male or female genotype of the person                                               | Male/female                                                                                                                     | Qualitative<br>nominal     |
| Weight          | How much the patient weighs at the time of study inclusion                          | Weight, kilograms                                                                                                               | Continuous<br>quantitative |
| Size            | How tall is the patient from head to toe at the time of study inclusion             | Height, centimetres                                                                                                             | Continuous<br>quantitative |
| Body mass index | The division between weight by height squared at the time of inclusion in the study | Units of Kg/cm <sup>2</sup>                                                                                                     | Continuous<br>quantitative |
| Occupation      | Remunerative work performed by the participant at the time of recruitment           | Unemployed, informal, unskilled employee, micro-entrepreneur or saleswoman, administrative employee, professional, entrepreneur | Qualitative<br>nominal     |

|                |                                                                                                                                                               |                                                                                            |                     |
|----------------|---------------------------------------------------------------------------------------------------------------------------------------------------------------|--------------------------------------------------------------------------------------------|---------------------|
| Civil status   | Civil status of the individual                                                                                                                                | Married, single, widowed, divorced, common-law union                                       | Qualitative nominal |
| Level of study | Years completed and approved at the time of study recruitment                                                                                                 | No studies, primary, secondary, preparatory, technical career, undergraduate, postgraduate | Ordinal qualitative |
| Alcohol intake | Consumption of alcoholic beverages                                                                                                                            | Intake of alcoholic beverages                                                              | Qualitative nominal |
| Smoking habit  | Habitual tobacco uses at the time of recruitment                                                                                                              | Number of packs of cigarettes consumed per day.                                            | Quantitative        |
| Drug's use     | Regular use of chemicals such as amphetamines, cocaine, marijuana, LSD, heroin, glass                                                                         | Consumption of drugs                                                                       | Qualitative nominal |
| Hypertension   | Elevation of blood pressure >130/80                                                                                                                           | Positive/negative                                                                          | Qualitative nominal |
| Asthma         | Chronic inflammatory disease characterized by bronchial hyperactivity with recurrent episodes of bronchospasm                                                 | Positive/negative                                                                          | Qualitative nominal |
| Diabetes       | Group of metabolic diseases, which occurs when the pancreas does not produce enough insulin or when the body does not use the insulin it produces effectively | Positive/negative                                                                          | Qualitative nominal |
| Obesity        | Pathological state characterized by a general excess or excessive accumulation of fat in the body                                                             | Positive/negative                                                                          | Qualitative nominal |

|                      |                                                                                                                                                                                                                                                                                                                                                                                                                                                                                                                                                      |                   |                     |
|----------------------|------------------------------------------------------------------------------------------------------------------------------------------------------------------------------------------------------------------------------------------------------------------------------------------------------------------------------------------------------------------------------------------------------------------------------------------------------------------------------------------------------------------------------------------------------|-------------------|---------------------|
| SARS-CoV-2 pneumonia | A form of severe pneumonia caused by coronavirus                                                                                                                                                                                                                                                                                                                                                                                                                                                                                                     | Positive/negative | Qualitative nominal |
| Death                | Statistical term that describes the death of an individual                                                                                                                                                                                                                                                                                                                                                                                                                                                                                           | Positive/negative | Qualitative nominal |
| Intensive Care Unit  | Special facility in a hospital area, which provides life support to critically ill patients, requiring intensive supervision and monitoring                                                                                                                                                                                                                                                                                                                                                                                                          | Positive/negative | Qualitative nominal |
| Severe pneumonia     | Defined by the American Thoracic Society Criteria requiring at least one main criterion (need for invasive mechanical ventilation and shock with need for vasopressors), or three minor criteria (respiratory rate > 30 bpm, PaO <sub>2</sub> / FiO <sub>2</sub> ratio < 250, Infiltrates multilobars, confusion / disorientation, uremia [BUN > 20 mg / dL], leukopenia [ $< 4,000$ ], thrombocytopenia [ $< 100,000$ platelets / mm <sup>3</sup> ], hypothermia [core temperature < 36°C], or hypotension requiring aggressive fluid resuscitation | Positive/negative | Qualitative nominal |
| Pneumonia            | Acute infection of the lung parenchyma, accompanied by bilateral infiltrates on chest X-ray                                                                                                                                                                                                                                                                                                                                                                                                                                                          | Positive/negative | Qualitative nominal |
| Confusion            | Glasgow scale less than 15                                                                                                                                                                                                                                                                                                                                                                                                                                                                                                                           | Positive/negative | Qualitative nominal |
| Hypothermia          | Body temperature less than 36 degrees Celsius                                                                                                                                                                                                                                                                                                                                                                                                                                                                                                        | Positive/negative | Qualitative nominal |
| Thrombocytopenia     | Total platelets less than 100,000 per mm <sup>3</sup> .                                                                                                                                                                                                                                                                                                                                                                                                                                                                                              | Positive/negative | Qualitative nominal |



|                                                         |                                                                                                                                                                                                       |                   |                     |
|---------------------------------------------------------|-------------------------------------------------------------------------------------------------------------------------------------------------------------------------------------------------------|-------------------|---------------------|
| Arterial hypotension                                    | Systolic blood pressure less than 90 mmHg or mean arterial pressure less than 60 mmHg                                                                                                                 | Positive/negative | Qualitative nominal |
| Sepsis                                                  | Rapid SOFA score (qSOFA) with 2 of the following three clinical variables: Glasgow $\leq$ 13, systolic pressure $\leq$ 100 mm Hg, or respiratory rate $\geq$ 22 bpm                                   | Positive/negative | Qualitative nominal |
| qRT-PCR for SARS-CoV-2                                  | Molecular diagnosis for SARS-CoV-2 from viral RNA                                                                                                                                                     | Positive/negative | Qualitative nominal |
| Septic shock                                            | Arterial hypotension that persists after resuscitation volume and that requires vasopressors to maintain MAP $\geq$ 65 mm Hg and lactate $\geq$ 2 mmol / L (18 mg / dL) in the absence of hypovolemia | Positive/negative | Qualitative nominal |
| Adverse events related to the use of Hydroxychloroquine | Indirect drug-related mortality, nausea, vomiting, abdominal pain, rash, itchy skin, hair loss, QT segment elongation on electrocardiogram, corneal opacity, cardiac arrhythmias, and heart failure   | Positive/negative | Qualitative nominal |
| Adverse events related to the use of Bromhexine         | Indirect drug-related mortality, nausea, vomiting, abdominal pain, rash, diarrhea.                                                                                                                    | Positive/negative | Qualitative nominal |

### Sample size calculation

According to the study by Remuzzi A et al.<sup>14</sup>, the proportion of healthcare workers infected with SARS-CoV-2 and confirmed by RT-PCR was 20%. Taking this 20% as our null hypothesis, we calculate that the proportion of infections in the intervention group will be 4%. Using a two-tailed test, with a type I error of 0.05, a power of 80%, and taking into account a loss of 10% of participants for each group, we estimate that a total of 280 participants will be required, distributed in parallel groups (1:1) of 70 each. This number

1  
2  
3 204 of volunteers will allow us to find a difference of 16% between groups with a power of 80%. To ensure  
4  
5 205 that desired sample size is reached, all health workers involved in managing patients suspected or infected  
6  
7  
8 206 by SARS-CoV-2 will be invited personally and by institutional email.  
9

## 10 207 11 12 208 **Interventions**

13  
14  
15 209 Interventions will consist of low doses of HCQ 200 mg tablets every 24 hours for 60 days, and BHH 8  
16  
17 210 mg tablets every 8 hours for 60 days. Study groups will be defined as follows: 1) HCQ 200 mg every 24  
18  
19 211 hours plus BHH placebo; 2) BHH 8 mg every 8 hours plus HCQ placebo; 3) HCQ 200 mg every 24 hours  
20  
21  
22 212 plus BHH 8 mg every 8 hours; and 4) HCQ placebo plus BHH placebo. Fabrication of both drugs and  
23  
24 213 placebos will be provided to our centre by a hired laboratory. Both drugs will be provided to participants  
25  
26 214 directly at the hospital by a researcher blinded to group assignment process. To ensure that the intervention  
27  
28 215 is carried out, each participant will be asked to keep a written record of the days and time the medication  
29  
30  
31 216 was administered. This document will be reviewed weekly to verify that more than 50% adherence to  
32  
33 217 treatment is maintained. Participants will be asked to record any symptoms related to the use of the  
34  
35 218 medication, which will be reviewed by a researcher blinded to group assignment, weekly, or at the  
36  
37  
38 219 participants' request.  
39

40 220  
41  
42 221 If any of the participants present symptoms of SARS-CoV-2 infection after the first 14 days from the  
43  
44 222 beginning of the intervention or positive qRT-PCR is present, the drug will be discontinued. If the  
45  
46  
47 223 participant presents adverse events related to the drugs that are severe or intolerable, treatment will be  
48  
49 224 suspended. If the participants report an adherence of less than 50% of the medication, the intervention will  
50  
51  
52 225 be discontinued. Use of drugs that interact with HCQ or BHH such as flecainide, digitalis, amiodarone,  
53  
54 226 procainamide or propafenone will be prohibited. If a participant has to use these drugs during the study  
55  
56  
57  
58  
59

1  
2  
3 227 period, they will be eliminated from the study. A free diet and outdoor activity will be allowed since these  
4  
5  
6 228 do not intervene with the implementation of the treatment or have interaction with the drugs used. Finally,  
7  
8 229 incidence of adverse events such as nausea, vomiting, abdominal pain, rash, itchy skin, hair loss,  
9  
10 230 lengthening of the QT interval in the electrocardiogram, corneal opacity, cardiac arrhythmias, heart failure  
11  
12 231 and death will be determined.  
13

14  
15 232

### 16 17 233 **Randomization and treatment allocation**

18  
19 234 Group randomization will be in a centralized and straightforward way using the Web program  
20  
21  
22 235 [www.randomization.com](http://www.randomization.com). It will be carried out independently by a researcher blinded to inclusion criteria,  
23  
24 236 delivery of medication, participant follow-up, results, statistical analysis, and writing of the final  
25  
26 237 manuscript. Allocation will be established, for 280 participants in blocks of 70 assigned. The selection of  
27  
28  
29 238 health workers will be made regardless of the hospital shift, work schedule, or assigned area. If the desired  
30  
31 239 sample size is not reached, the inclusion of personnel involved in the first line of care of other referral  
32  
33 240 hospitals for patients with SARS-CoV-2 will be considered.  
34

35 241 An independent researcher will allocate patients to the desired groups. Envelopes will be correctly sealed  
36  
37  
38 242 by the pharmacy department, and will contain HCQ, BHH or placebos as previously mentioned. In those  
39  
40 243 who do not require HCQ or BHH, the drug will be replaced by tablets identical in colour and taste but  
41  
42 244 lacking the active substance. In this way, drugs used in both groups will be indistinguishable.  
43

44  
45 245  
46  
47 246 Researcher A will recruit the participants and assess the inclusion criteria according to the serological,  
48  
49 247 electrocardiographic, and biochemical results. Once included, volunteers will go to another office with  
50  
51  
52 248 researcher B, who will be blinded to the first procedure and the rest of the study. Researcher B will assign  
53  
54 249 the groups independently, centrally, and through the use of the web program. This same researcher will  
55

56  
57  
58  
59  
60

1  
2  
3 250 be the one who makes the packages indistinguishable to the person providing the drugs to the participant.  
4

5 251 Researcher C will provide treatment in a sealed envelope or box to the participant in the order of  
6  
7  
8 252 assignment, without knowing each participant's study group. This researcher will also be blinded to the  
9  
10 253 rest of the results. Participants will be blinded to the treatment they will receive. The researchers  
11  
12 254 performing follow-up, researchers for result assessment, and the researcher who performs the statistical  
13  
14  
15 255 analysis will be blinded.  
16

17 256  
18  
19 257 Informed consent will be obtained only by researcher A. If researcher A is not available, the study  
20  
21  
22 258 administrator may obtain informed consent for participation. The informed consent will contain the  
23  
24 259 authorization to participate in the study and the authorization for taking biological samples,  
25  
26 260 electrocardiogram, and authorization to handle personal information. All participants will complete a  
27  
28  
29 261 written informed consent included on the first page of the questionnaire that requires permission to  
30  
31 262 participate in the study. No candidate is required to participate in the study, and their participation is based  
32  
33 263 on the agreement that they may withdraw at any time. All participants have the right to withdraw from the  
34  
35 264 study if they feel uncomfortable answering a question or with a test to be performed. Also, no one,  
36  
37  
38 265 including the research team, will require a reason why the participant decides to leave the study.  
39

40 266 In order to protect participant confidentiality, each one will be assigned a participation number, and all  
41  
42 267 biological samples, as well as medical history information, will be identified by the participant's initials,  
43  
44  
45 268 date of birth and participant number. Part of the confidentiality protection process will include data capture  
46  
47 269 only by the researcher in charge of data capture (researcher D), who will be the same for all participants  
48  
49 270 and the entire study. Secondarily, the study administrator may also enter data into the database if  
50  
51  
52 271 researcher D is unavailable.  
53

1  
2  
3 273 The study administrator will be blinded to allocation and results of the participants. However, the  
4  
5  
6 274 administrator will be the only one who will be able to reveal the group and treatment assignment in any  
7  
8 275 of the cases: major adverse events such as cardiac arrhythmias, heart failure, major neurological  
9  
10 276 abnormalities, atrial or ventricular fibrillation, kidney failure, or any adverse event related to  
11  
12 277 pharmacological treatment that endangers the life or any organ of the participant's body. The objective of  
13  
14  
15 278 revealing the assignment by the study administrator will be to provide the participant of a timely treatment  
16  
17 279 according to the drugs ingested.  
18

19 280  
20

### 21 **Participant timeline and intervention** 22 281

23  
24 282 The inclusion of participants will be evaluated according to the eligibility criteria and by invitation.  
25  
26 283 Volunteers who wish to participate in the study will be summoned the next day at a specialized office to  
27  
28  
29 284 carry out all the relevant studies to ensure the inclusion criteria. These include a medical history,  
30  
31 285 anthropometric measurements such as weight and body mass index, electrocardiogram, hematic biometry,  
32  
33 286 complete blood chemistry, and serological test for antibodies and qRT-PCR for SARS-CoV-2. Volunteers  
34  
35 287 will be asked for information to contact them once the serological results are obtained.  
36  
37  
38 288 Once the results are obtained (approximately 3 days), personnel eligible to participate in the study will be  
39  
40 289 contacted. They will meet in a particular office to speak with a researcher who will be in charge of carrying  
41  
42 290 out the eligibility criteria and medical history checklist. This researcher will be different from the one who  
43  
44  
45 291 makes the assignment, who delivers the medicine and the one who evaluates the results and performs the  
46  
47 292 statistical analysis. The assignment of the group of each participant will be performed, and the participant  
48  
49 293 will not know the group they have been assigned. This information will be known for the researcher in  
50  
51  
52 294 charge, unrelated to the delivery of the treatment, results, or inclusion of the participant in the study. After  
53  
54 295 the assignment, the volunteers will receive the assigned treatment at the pharmacy using a code in a sealed  
55  
56  
57  
58  
59

1  
2  
3 296 envelope assigned by the Web. Participants who meet the inclusion criteria and there is no reason for  
4  
5 297 exclusion will proceed to the second phase of group assignment with researcher B, the next business day  
6  
7  
8 298 at a different time or office than researcher A.  
9

10 299  
11  
12 300 The group of researchers in charge of monitoring the participants, who will be blinded to the group  
13  
14 301 assignment at all times, will be in charge of assessing each participant's adverse event and treatment  
15  
16 302 adherence record weekly. These follow-up researchers will be available 24 hours a day throughout the  
17  
18 303 week if participants experience undesirable adverse events that require urgent attention or that do not  
19  
20 304 allow them to continue with drug treatment. If this situation happens, the researcher in charge of the  
21  
22 305 follow-up will contact the study administrator to reveal to the treating physicians the treatment received  
23  
24 306 by the participant.  
25  
26  
27

28 307 At the end of the first 30 days, a new qRT-PCR will be requested from each participant. The same action  
29  
30  
31 308 will be carried out 60 days after the start of treatment for both groups. After 60 days, the treatment will be  
32  
33 309 suspended and the results of the qRT-PCR samples for SARS-CoV-2 will be evaluated.  
34  
35  
36

### 37 310 38 311 **Outcome measures**

39  
40 312 This study compares the efficacy of the use of HCQ and/or BHH in prophylactic doses for 60 days in  
41  
42 313 healthy health personnel exposed to the first line of care in confirmed patients with suspected infection by  
43  
44 314 SARS-CoV-2.  
45  
46  
47  
48

### 49 316 *Primary endpoint*

50  
51 317 The primary endpoint will be the proportion of health personnel infected by SARS-CoV-2 after seven  
52  
53 318 days of inclusion and up 60 days after starting treatment, in all groups. The infection will be diagnosed  
54  
55  
56  
57  
58  
59  
60

1  
2  
3 319 using qRT-PCR for SARS-CoV-2 after day 7 of treatment. The study period will be 60 days. The  
4  
5 320 proportion of infected personnel will be evaluated using relative risk (RR) and absolute risk increase (ARI)  
6  
7  
8 321 with their respective 95% confidence intervals, in the established time. The disease-free period in the 60  
9  
10 322 days will also be evaluated by analysing the cumulative incidence of healthy patients, and the presence of  
11  
12 323 confirmed infection by qRT-PCR of SARS-CoV-2 will be the outcome. The censoring variable will be  
13  
14  
15 324 the discontinuation of treatment either due to death, adverse events, or any elimination criteria. Since there  
16  
17 325 is the possibility of false positives and negatives with qRT-PCR, we will perform qualitative  
18  
19 326 measurements of IgM and IgG with the Elecsys® Anti-SARS-CoV-2 test from Roche laboratories.  
20

21  
22 327  
23  
24 328  
25

#### 26 329 *Secondary endpoints*

27  
28 330 The secondary endpoint will be the proportion of health personnel infected by SARS-CoV-2 after seven  
29  
30  
31 331 days of inclusion and up to 30 days after starting treatment, in all groups. The infection will be diagnosed  
32  
33 332 using qRT-PCR for SARS-CoV-2 after day 7 of the start of treatment. The study period will be 30 days.  
34  
35 333 The proportion of infected personnel will be evaluated using RR and ARI with their respective 95%  
36  
37  
38 334 confidence intervals, in the established time. The disease-free period in the 30 days will also be evaluated  
39  
40 335 by analyzing the cumulative incidence of healthy patients, and the presence of confirmed infection by  
41  
42 336 qRT-PCR of SARS-CoV-2 will be the outcome. The censoring variable will be the discontinuation of  
43  
44  
45 337 treatment either due to death, adverse events, or any elimination criteria.  
46

47 338  
48  
49 339 Another secondary endpoint will be adverse events, defined as the presence of any of the following during  
50  
51 340 the study period: death, nausea, vomiting, abdominal pain, diarrhoea, rash, itchy skin, hair loss,  
52  
53  
54 341 lengthening of the QT interval in the electrocardiogram (>500msec), corneal opacity, cardiac arrhythmias,  
55

56  
57  
58  
59  
60

1  
2  
3 342 heart failure or kidney failure (renal clearance <20ml/min). The proportion of the compound of adverse  
4  
5 343 events between the groups will be analysed using RR and ARI for 60 days with their respective 95%  
6  
7  
8 344 confidence intervals.  
9

10 345  
11  
12 346 The efficacy of the treatment will be established as the proportion of volunteers infected with SARS-CoV-  
13  
14  
15 347 2. This difference should be sufficient to avoid overlapping of the 95% confidence intervals. It will be  
16  
17 348 considered effective if the intervals do not overlap and ineffective if when comparing groups, they have a  
18  
19 349 proportion of infected whose confidence intervals overlap. This type of evaluation will allow an adequate  
20  
21  
22 350 understanding of the efficacy of the treatment in both groups.  
23  
24 351  
25

### 26 352 **Handling and storage of data and documents**

27

28  
29 353 Before the start of the study, the researchers in charge of the recruitment, assignment, and delivery of  
30  
31 354 drugs will be trained to perform the task assigned to them at least 3 days before the start of the study.  
32

33 355 Researcher A will assess the eligibility criteria of potential participants and perform a detailed clinical  
34  
35 356 examination to assess whether they can participate in the study. The data that will be collected initially  
36  
37  
38 357 will be the following:  
39  
40 358  
41

- 42 359 ► Medical history (includes personal data): study identifier number, history number, name, date of  
43  
44  
45 360 birth, gender, occupation, marital status, nationality, current residence, degree of studies (primary,  
46  
47 361 secondary, upper secondary, bachelor`s degree, postgraduate), hospital service to which they  
48  
49 362 belong and the number of hours worked per week.  
50
- 51  
52 363 ► Personal history: alcohol intake (yes/no; how many glasses of beer or alcoholic beverages do you  
53  
54 364 consume per week), smoking habit (yes/ no; and number of cigarettes per day), drug use (yes/no),  
55  
56  
57  
58  
59



- 1  
2  
3 365 diet per week (dietary restrictions and number of meals per day) and number of hours of sleep per  
4  
5  
6 366 day.
- 7  
8 367 ► Gynaecological history (in women): Number of pregnancies, number of live children, menarche,  
9  
10 368 menopause.
- 11  
12 369 ► History of respiratory disease, history of gastrointestinal disease, nephrological, neurological,  
13  
14  
15 370 haematological, cardiovascular, allergies.
- 16  
17 371 ► Genetic family history, such as hypertension, diabetes, heart disease, kidney disease.
- 18  
19 372 ► Physical examination: blood pressure, heart rate, respiratory rate, temperature, weight, height,  
20  
21  
22 373 body mass index, skin lesions, head and neck inspection, respiratory inspection (chest symmetry,  
23  
24 374 lung expansion, palpation of the bases and preserved vertices, lung percussion, auscultation for  
25  
26 375 lung murmur, breath sounds). Cardiovascular inspection (palpation of the fifth intercostal space,  
27  
28  
29 376 auscultation of heart sounds, pulses that are palpable and symmetrical), abdominal inspection  
30  
31 377 (palpation, percussion and auscultation of peristaltic sounds), neurological evaluation (Glasgow,  
32  
33 378 active motility, passive motility, reflex motility, cranial nerves, sensitivity).
- 34  
35 379 ► Hematic biometry: haematocrit, leukocytes, segmented (%), lymphocytes (%), monocytes (%),  
36  
37  
38 380 mean corpuscular volume, platelets.
- 39  
40 381 ► Blood chemistry: glycaemia, urea, creatinine, sodium, potassium, chlorine, aspartate transaminase,  
41  
42 382 alanine transaminase, alkaline phosphatase, total bilirubin.
- 43  
44  
45 383 ► Muscle enzymes.
- 46  
47 384 ► Clotting times: thrombin time, prothrombin time, international normalized ratio.
- 48  
49 385 ► Electrocardiogram: rhythm, heart rate, heart axis, evaluation of P wave, PR interval, duration of  
50  
51  
52 386 QRS, QT interval, time of T wave. The electrocardiogram will be performed using an instrument  
53  
54 387 calibrated and validated for its use internationally, weekly.
- 55  
56  
57  
58  
59  
60

1  
2  
3 388 ► Molecular test results for IgG and IgM antibodies:  
4

- 5  
6 389 ○ The FDA approved product called Cellex qSARS-CoV-2 IgG/IgM Rapid Test will be used  
7  
8 390 for serological determination. The device cassette, sample, and buffer solution must be at  
9  
10 391 room temperature. The sample (10 µL) is transferred to the center of the sample well. After  
11  
12 392 the sample well is free of liquid, two drops of sample diluent are added. After fifteen to  
13  
14  
15 393 twenty minutes, read the test results. Results should not be read after twenty minutes.  
16  
17 394 ○ A positive IgM result occurs when a coloured band appears on the M test line (M) and the  
18  
19 395 control line (C) and indicates that IgM against SARS-CoV-2 is present.  
20  
21  
22 396 ○ A positive IgG result occurs when a coloured band appears on the G test line (G) and the  
23  
24 397 control line (C) and indicates that IgG against SARS-CoV-2 is present.  
25  
26 398 ○ A positive result for IgM and IgG occurs when coloured bands occur both M and G, as  
27  
28  
29 399 well as C.  
30  
31 400 ○ A negative result occurs when a coloured band appears in C only and indicates that IgM  
32  
33 401 and IgG antibodies against SARS-CoV-2 were not detected.  
34  
35  
36 402 ○ An invalid result occurs when a colour band is not produced in C, and the test must be  
37  
38 403 repeated.  
39

40 404 ► Official qRT-PCR results (carried out by INCMNSZ)  
41  
42 405  
43  
44

45 406 All this information will be collected in a pre-established medical history questionnaire for each potential  
46  
47 407 participant. The information obtained from the weekly assessment of adverse events, and the results of  
48  
49 408 the qRT-PCR for SARS-CoV-2 at 30 and 60 days after starting treatment will be entered into an online  
50  
51  
52 409 database. In order to ensure the quality of the data collection, the database will be built in CASTOR, a  
53  
54 410 database on the Web that allows entering all the pre-defined data for each participant, thus reducing human  
55  
56  
57  
58  
59  
60

1  
2  
3 411 error. This information will be stored on a server in the United States of America and can only be accessed  
4  
5 412 by the study's administrator. The data may only be entered by a researcher in charge of collecting the data  
6  
7  
8 413 sheets and emptying them.  
9

10 414

## 11 12 415 **Monitoring and quality assurance** 13

14  
15 416 Every possible adverse event will be noted daily by the participants in the agenda that will be delivered to  
16  
17 417 them. This agenda will be evaluated weekly by the researcher in charge of monitoring the participants  
18  
19 418 (who will be blinded to group assignment). In case of unbearable adverse events for the participants or  
20  
21 419 that put their health at risk, an open line will be available 24 hours a day with direct communication to the  
22  
23  
24 420 researcher in charge of monitoring the study to report any event that requires hospitalization or immediate  
25  
26 421 evaluation at the hospital. All participants with adverse events that put their life or health at risk may be  
27  
28 422 urgently assessed by personnel from both INCMNSZ or INR-LGII, if possible, by the same staff within  
29  
30  
31 423 which are part of the study. Patient follow-up investigator will immediately contact the study administrator  
32  
33 424 to disclose the participant's assignment to treating physicians at that institution, but the assignment will  
34  
35 425 never be disclosed to other investigators related to the study. All the study expenses and/or attention of  
36  
37  
38 426 collateral effects will be covered by the current cost of the financing SECTEI/061/2020.  
39

40 427 Auditing will be carried out weekly, assessing adverse events, capturing data in the corresponding  
41  
42 428 datasheets by the study administrator. Likewise, the data entered in the CASTOR web base will be valued  
43  
44  
45 429 to validate its quality. The paper data sheets must be kept in a special office dedicated to the study in  
46  
47 430 folders separated by volunteers with the informed consent of each participant, the data of the medical  
48  
49 431 history, laboratory results, eligibility criteria, adverse event sheet and results, molecular tests, as well as  
50  
51  
52 432 electrocardiogram. The letter of revocation of informed consent will also be protected if required. As part  
53  
54 433 of the audit, an interim analysis will be carried out 30 days after the study starts to assess the possible  
55  
56  
57  
58  
59

1  
2  
3 434 adverse effects and whether these outweigh the potential benefits of the intervention. In the adverse event  
4  
5  
6 435 outweigh the potential benefits, termination of the study will be assessed. The approval of the research  
7  
8 436 ethics committee of the INR-LGII of Mexico has been obtained.  
9

### 10 437 11 12 438 **Statistical analysis** 13

14  
15 439 Data analysis will be carried out by intention to treat, which means that each participant will be analysed  
16  
17 440 according to the group assigned regardless of whether they modified their treatment. The study variables  
18  
19 441 will be divided according to the allocation group. The distribution of continuous variables will be assessed  
20  
21  
22 442 using the Shapiro Wilk test, Skewness and kurtosis. The variables of normal distribution will be compared  
23  
24 443 using the Student's *t*-test, non-parametric distribution using the Mann-Whitney U test. Categorical  
25  
26 444 variables will be evaluated using the Chi-squared test.  
27

28  
29 445  
30  
31 446 The primary objective will be expressed in number and proportion for each group. The RR will be obtained  
32  
33 447 as the division between the proportion of primary outcomes in the intervention group(s) by the proportion  
34  
35 448 of primary outcomes in the double placebo group. Adjusted risk ratios (aRR) will be obtained using a log-  
36  
37  
38 449 binomial regression, adjusting for age and gender as pre-specified confounding variables. It will be  
39  
40 450 expressed as RR with its respective 95% confidence interval for the initial time, which is 60 days.  
41  
42 451 Likewise, the result will be expressed as absolute risk, which will be derived from the proportion of the  
43  
44  
45 452 primary outcome in the intervention group minus the proportion of the primary outcome in the control  
46  
47 453 group. Secondly, the primary objective will be analysed with the non-parametric estimate of the  
48  
49 454 survival and risk function using Kaplan-Meier curves for 60 days according to the allocation group. The  
50  
51  
52 455 primary endpoint will be SARS-CoV-2 infection within the 60-day period, and the silencing variable will  
53  
54 456 be dropping out of the study for any reason. The comparison of the survival curves between both groups  
55  
56  
57  
58  
59

1  
2  
3 457 will be carried out using the log-rank test. To adjust the primary objective to possible confounders such  
4  
5  
6 458 as age, gender, service in which the participant works, body mass index, etc. Multiple regression will be  
7  
8 459 performed using the Cox model to determine the adjusted primary endpoint hazard ratio.  
9

10 460  
11  
12 461 For secondary outcomes such as the analysis at 30 days, the same statistical analysis expressed in RR and  
13  
14  
15 462 absolute risk will be used. Survival analysis will be used for the primary endpoint only. An interim  
16  
17 463 statistical analysis will be performed 30 days after the study starts to assess possible adverse effects and  
18  
19 464 the efficacy of the intervention. The study administrator will be the only one with access to the data. For  
20  
21  
22 465 the interim analysis and the final analysis, the administrator will export the data to Excel format to be  
23  
24 466 analysed by the study statistician blinded to the assignment of groups, participants, or results.  
25

26 467  
27  
28  
29 468 **Adverse events, serious adverse events and suspected unexpected serious adverse reactions**

30  
31 469 By requiring the use of drugs, the participant will be exposed to risks inherent to the drug used, ranging  
32  
33 470 from mild to severe or death. Any unexpected risks that may occur during the study will be immediately  
34  
35 471 explained to the participants and the ethics committee. Any adverse event will be compiled and will not  
36  
37  
38 472 be disclosed under any condition to anyone other than the study administrator, treating physicians in case  
39  
40 473 of severe events, and the ethics committee. The results will be completely anonymous concerning the  
41  
42 474 names of the participants. The results will be compiled and reported as combined collective data.  
43

44  
45 475  
46  
47 476 *Patient and public involvement*  
48

49 477 Patients were not involved in the development of this research. However, the results of the study will be  
50  
51  
52 478 communicated to the study participants by sending the end product (published article) to the provided  
53  
54 479 email address.  
55

56  
57  
58  
59  
60

1  
2  
3 **480 ETHICS, DISSEMINATION AND SAFETY MONITORING**  
4

5  
6 481 In case of adverse events or complications derived from the study, participants will be assured attention  
7  
8 482 by the staff of the INCMNSZ in an enclosure that ensures the safety of the participant, not subjecting  
9  
10 483 volunteers to a higher risk of contamination. This care will be extended until adverse events are resolved.  
11  
12 484 In case of no adverse events during the study, medical attention will be extended at the aforementioned  
13  
14  
15 485 institute until 15 days after the end of the study.  
16

17 486  
18  
19 487 This protocol has been approved by the local medical ethical review committee at the INR-LGII with the  
20  
21  
22 488 internal number INRLGII/25/20, and by the Federal Commission for Protection against Sanitary Risks (in  
23  
24 489 Spanish, Comisión Federal para la Protección contra Riesgos Sanitarios, COFEPRIS), approval number  
25  
26 490 203300410A0058/2020.  
27

28  
29 491  
30  
31 492 The study results will be published in journals of worldwide impact affiliated with the Journal Citation  
32  
33 493 Reports. Likewise, the results of the study will be disseminated in national and international media,  
34  
35 494 exposed in international and national congresses, communicated to CONACYT, and recorded in  
36  
37  
38 495 Clinicaltrials.gov according to the study identifier number. The help of non-profit organizations will be  
39  
40 496 sought to disseminate the results of the investigation to interest groups.  
41

42 497  
43  
44  
45 498 The complete protocol will be published on Clinicaltrials.gov and the OSF - Center for Open Science  
46  
47 499 platform <https://osf.io/>. Where a DOI will be assigned, and the amendments made to the original protocol  
48  
49 500 will be assessed.  
50

1  
2  
3 502 Amendments to the protocol may be made before the start of the study and during the study. Any  
4  
5 503 amendment to the protocol will be clarified and posted on Clinicaltrials.gov under the same identifier as  
6  
7  
8 504 this study. Likewise, any amendment will be sent to the ethics committee of the same hospital.  
9

10505

## 11 12 13506 **AUTHOR CONTRIBUTIONS**

14  
15507 JGM is the lead study investigator, developed the study concepts and design, and wrote the manuscript by  
16  
17508 adapting the original study protocol for publication, subsequent reviews and amendments. EJHL, KMM  
18  
19  
20509 and AAA contributed to the development and refining of the protocol, writing of manuscript and  
21  
22510 subsequent review. RJMP provided advanced methodological and statistical input, and contributed to the  
23  
24511 study design and subsequent amendments. RFC, TCH, PSSB, RAG and NML reviewed, commented and  
25  
26  
27512 informed methodology, development and writing of the protocol.  
28

29513

## 30 31514 **FUNDING STATEMENT**

32  
33  
34515 This work was supported by the Mexican Education, Science, Technology and Innovation Department (in  
35  
36516 Spanish, Secretaría de Educación, Ciencia, Tecnología e Innovación), grant number SECTEI/061/20.  
37

38517

## 39 40 41518 **COMPETING INTERESTS STATEMENT**

42  
43519 None of the authors have conflict of interests, commercial agreements, or receive financial fees or  
44  
45  
46520 compensation from any commercial or pharmaceutical company.  
47

48521

## 49 50 51522 **ETHICS APPROVAL**

52  
53523 This protocol has been approved by the local medical ethical review committee at the INR-LGII with the  
54  
55524 internal number INRLGII/25/20. Definitions of Research Risk Regulation of the General Health Law on  
56

57

58

59

60

1  
2  
3 525 Research for Health (in Spanish, Reglamento de la Ley General de Salud en Materia de Investigación para  
4  
5 526 la Salud) <http://www.inr.gob.mx/Descargas/Investigacion/Reglamentos-LGS-Materia-Investigacion->  
6  
7  
8 527 Salud.pdf. ARTICLE 17; and by Federal Commission for Protection against Sanitary Risks (in Spanish,  
9  
10 528 Comisión Federal para la Protección contra Riesgos Sanitarios, COFEPRIS), approval number  
11  
12 529 203300410A0058/2020.  
13  
14  
15 530

## 16 17 531 **PROVENANCE AND PEER REVIEW**

18  
19  
20 532 Not commissioned; externally peer reviewed.  
21  
22 533

## 23 24 534 **ORCID ID**

25  
26  
27 535 Julio Granados-Montiel <https://orcid.org/0000-0002-0611-64>  
28  
29 536

## 30 31 32 537 **REFERENCES**

- 33  
34 538
- 35  
36  
37 539 1. Organization WH. WHO | Novel Coronavirus – China. *World Health Organization* 2020  
38
  - 39 540 2. Organization WH. Naming the coronavirus disease (COVID-19) and the virus that causes it, 2020.  
40
  - 41 541 3. The species Severe acute respiratory syndrome-related coronavirus: classifying 2019-nCoV and  
42  
43 542 naming it SARS-CoV-2. *Nat Microbiol* 2020;5(4):536-44. doi: 10.1038/s41564-020-0695-z  
44  
45  
46 543 [published Online First: 2020/03/04]  
47
  - 48 544 4. [Internet]. C-DM. COVID - 19 Dashboard México. 2020 [cited 2020 13/12/2020]. Available from:  
49  
50 545 <https://datos.covid-19.conacyt.mx/index.php>.  
51  
52  
53  
54  
55  
56  
57  
58  
59  
60



- 1  
2  
3 546 5. Pal M, Berhanu G, Desalegn C, et al. Severe Acute Respiratory Syndrome Coronavirus-2 (SARS-  
4  
5 547 CoV-2): An Update. *Cureus* 2020;12(3):e7423. doi: 10.7759/cureus.7423 [published Online  
6  
7 First: 2020/04/28]  
8 548  
9
- 10 549 6. Lai C, Yu R, Wang M, et al. Shorter incubation period is associated with severe disease progression  
11  
12 550 in patients with COVID-19. *Virulence* 2020;11(1):1443-52. doi:  
13  
14 10.1080/21505594.2020.1836894 [published Online First: 2020/10/28]  
15 551  
16
- 17 552 7. Guan WJ, Ni ZY, Hu Y, et al. Clinical Characteristics of Coronavirus Disease 2019 in China. *N Engl*  
18  
19 553 *J Med* 2020;382(18):1708-20. doi: 10.1056/NEJMoa2002032 [published Online First:  
20  
21 2020/02/29]  
22 554  
23
- 24 555 8. Li C, Ji F, Wang L, et al. Asymptomatic and Human-to-Human Transmission of SARS-CoV-2 in a 2-  
25  
26 556 Family Cluster, Xuzhou, China. *Emerg Infect Dis* 2020;26(7):1626-28. doi:  
27  
28 10.3201/eid2607.200718 [published Online First: 2020/04/02]  
29 557  
30
- 31 558 9. Xu H, Zhong L, Deng J, et al. High expression of ACE2 receptor of 2019-nCoV on the epithelial cells  
32  
33 559 of oral mucosa. *Int J Oral Sci* 2020;12(1):8. doi: 10.1038/s41368-020-0074-x [published Online  
34  
35 560 First: 2020/02/26]  
36  
37
- 38 561 10. Levy A, Yagil Y, Bursztyn M, et al. ACE2 expression and activity are enhanced during pregnancy.  
39  
40 562 *Am J Physiol Regul Integr Comp Physiol* 2008;295(6):R1953-61. doi:  
41  
42 563 10.1152/ajpregu.90592.2008 [published Online First: 2008/10/24]  
43  
44
- 45 564 11. Baig AM, Khaleeq A, Ali U, et al. Evidence of the COVID-19 Virus Targeting the CNS: Tissue  
46  
47 565 Distribution, Host-Virus Interaction, and Proposed Neurotropic Mechanisms. *ACS Chem*  
48  
49 566 *Neurosci* 2020;11(7):995-98. doi: 10.1021/acscchemneuro.0c00122 [published Online First:  
50  
51 2020/03/14]  
52 567  
53  
54  
55  
56  
57  
58  
59  
60

- 1  
2  
3 568 12. Zhan M, Qin Y, Xue X, et al. Death from Covid-19 of 23 Health Care Workers in China. *N Engl J*  
4  
5 569 *Med* 2020;382(23):2267-68. doi: 10.1056/NEJMc2005696 [published Online First: 2020/04/16]  
6  
7  
8 570 13. Wu Z, McGoogan JM. Characteristics of and Important Lessons From the Coronavirus Disease 2019  
9  
10 571 (COVID-19) Outbreak in China: Summary of a Report of 72 314 Cases From the Chinese Center  
11  
12 572 for Disease Control and Prevention. *Jama* 2020;323(13):1239-42. doi: 10.1001/jama.2020.2648  
13  
14  
15 573 [published Online First: 2020/02/25]  
16  
17 574 14. Remuzzi A, Remuzzi G. COVID-19 and Italy: what next? *Lancet* 2020;395(10231):1225-28. doi:  
18  
19 575 10.1016/s0140-6736(20)30627-9 [published Online First: 2020/03/18]  
20  
21  
22 576 15. Wang LF, Lin YS, Huang NC, et al. Hydroxychloroquine-inhibited dengue virus is associated with  
23  
24 577 host defense machinery. *J Interferon Cytokine Res* 2015;35(3):143-56. doi:  
25  
26 578 10.1089/jir.2014.0038 [published Online First: 2014/10/17]  
27  
28  
29 579 16. Helal GK, Gad MA, Abd-Ellah MF, et al. Hydroxychloroquine augments early virological response  
30  
31 580 to pegylated interferon plus ribavirin in genotype-4 chronic hepatitis C patients. *J Med Virol*  
32  
33 581 2016;88(12):2170-78. doi: 10.1002/jmv.24575 [published Online First: 2016/05/18]  
34  
35 582 17. Wang M, Cao R, Zhang L, et al. Remdesivir and chloroquine effectively inhibit the recently  
36  
37  
38 583 emerged novel coronavirus (2019-nCoV) in vitro. *Cell Res* 2020;30(3):269-71. doi:  
39  
40 584 10.1038/s41422-020-0282-0 [published Online First: 2020/02/06]  
41  
42 585 18. Gao J, Tian Z, Yang X. Breakthrough: Chloroquine phosphate has shown apparent efficacy in  
43  
44  
45 586 treatment of COVID-19 associated pneumonia in clinical studies. *Biosci Trends* 2020;14(1):72-  
46  
47 587 73. doi: 10.5582/bst.2020.01047 [published Online First: 2020/02/20]  
48  
49 588 19. Yao X, Ye F, Zhang M, et al. In Vitro Antiviral Activity and Projection of Optimized Dosing Design  
50  
51 589 of Hydroxychloroquine for the Treatment of Severe Acute Respiratory Syndrome Coronavirus 2  
52  
53  
54  
55  
56  
57  
58  
59  
60

- 1  
2  
3 590 (SARS-CoV-2). *Clin Infect Dis* 2020;71(15):732-39. doi: 10.1093/cid/ciaa237 [published Online  
4  
5 591 First: 2020/03/10]  
6  
7  
8 592 20. Dutta D, Sharma M, Sharma R. Short-term Hydroxychloroquine in COVID-19 Infection in People  
9  
10 593 With or Without Metabolic Syndrome - Clearing Safety Issues and Good Clinical Practice. *Eur*  
11  
12 594 *Endocrinol* 2020;16(2):109-12. doi: 10.17925/ee.2020.16.2.109 [published Online First:  
13  
14 2020/10/30]  
15 595  
16  
17 596 21. Han H, Ma Q, Li C, et al. Profiling serum cytokines in COVID-19 patients reveals IL-6 and IL-10  
18  
19 597 are disease severity predictors. *Emerg Microbes Infect* 2020;9(1):1123-30. doi:  
20  
21 10.1080/22221751.2020.1770129 [published Online First: 2020/06/02]  
22 598  
23  
24 599 22. Paiardini M, Müller-Trutwin M. HIV-associated chronic immune activation. *Immunol Rev*  
25  
26 600 2013;254(1):78-101. doi: 10.1111/imr.12079 [published Online First: 2013/06/19]  
27  
28  
29 601 23. Chude CI, Amaravadi RK. Targeting Autophagy in Cancer: Update on Clinical Trials and Novel  
30  
31 602 Inhibitors. *Int J Mol Sci* 2017;18(6) doi: 10.3390/ijms18061279 [published Online First:  
32  
33 603 2017/06/18]  
34  
35  
36 604 24. Geleris J, Sun Y, Platt J, et al. Observational Study of Hydroxychloroquine in Hospitalized Patients  
37  
38 605 with Covid-19. *N Engl J Med* 2020;382(25):2411-18. doi: 10.1056/NEJMoa2012410 [published  
39  
40 606 Online First: 2020/05/08]  
41  
42  
43 607 25. Zanasi A, Mazzolini M, Kantar A. A reappraisal of the mucoactive activity and clinical efficacy of  
44  
45 608 bromhexine. *Multidiscip Respir Med* 2017;12:7. doi: 10.1186/s40248-017-0088-1 [published  
46  
47 609 Online First: 2017/03/24]  
48  
49  
50 610 26. Depfenhart M, de Villiers D, Lemperle G, et al. Potential new treatment strategies for COVID-19: is  
51  
52 611 there a role for bromhexine as add-on therapy? *Intern Emerg Med* 2020;15(5):801-12. doi:  
53  
54 612 10.1007/s11739-020-02383-3 [published Online First: 2020/05/28]  
55  
56  
57  
58  
59  
60

1  
2  
3  
4  
5  
6  
7  
8  
9  
10  
11  
12  
13  
14  
15  
16  
17  
18  
19  
20  
21  
22  
23  
24  
25  
26  
27  
28  
29  
30  
31  
32  
33  
34  
35  
36  
37  
38  
39  
40  
41  
42  
43  
44  
45  
46  
47  
48  
49  
50  
51  
52  
53  
54  
55  
56  
57  
58  
59  
60

- 613 27. Hoffmann M, Kleine-Weber H, Schroeder S, et al. SARS-CoV-2 Cell Entry Depends on ACE2 and  
614 TMPRSS2 and Is Blocked by a Clinically Proven Protease Inhibitor. *Cell* 2020;181(2):271-  
80.e8. doi: 10.1016/j.cell.2020.02.052 [published Online First: 2020/03/07]
- 616 28. Mareev VY, Orlova YA, Pavlikova EP, et al. [Combination therapy at an early stage of the novel  
617 coronavirus infection (COVID-19). Case series and design of the clinical trial "BromhexIne and  
618 Spironolactone for CoronavirUs Infection requiring hospiTalization (BISCUIT)"]. *Kardiologiia*  
2020;60(8):4-15. doi: 10.18087/cardio.2020.8.n1307 [published Online First: 2020/11/07]

1  
2  
3  
4  
5  
6  
7  
8  
9  
10  
11  
12  
13  
14  
15  
16  
17  
18  
19  
20  
21  
22  
23  
24  
25  
26  
27  
28  
29  
30  
31  
32  
33  
34  
35  
36  
37  
38  
39  
40  
41  
42  
43  
44  
45  
46  
47  
48  
49  
50  
51  
52  
53  
54  
55  
56  
57  
58  
59  
60

621

For peer review only

SPIRIT 2013 Checklist: Recommended items to address in a clinical trial protocol and related documents\*

| Section/item                      | ItemNo | Description                                                                                                                                                                                                                                                                              | Page/Line            |
|-----------------------------------|--------|------------------------------------------------------------------------------------------------------------------------------------------------------------------------------------------------------------------------------------------------------------------------------------------|----------------------|
| <b>Administrative information</b> |        |                                                                                                                                                                                                                                                                                          |                      |
| Title                             | 1      | Descriptive title identifying the study design, population, interventions, and, if applicable, trial acronym                                                                                                                                                                             | 1/1-3                |
| Trial registration                | 2a     | Trial identifier and registry name. If not yet registered, name of intended registry                                                                                                                                                                                                     | 52/4                 |
|                                   | 2b     | All items from the World Health Organization Trial Registration Data Set                                                                                                                                                                                                                 | -                    |
| Protocol version                  | 3      | Date and version identifier                                                                                                                                                                                                                                                              | -                    |
| Funding                           | 4      | Sources and types of financial, material, and other support                                                                                                                                                                                                                              | 27/516-517           |
| Roles and responsibilities        | 5a     | Names, affiliations, and roles of protocol contributors                                                                                                                                                                                                                                  | 1/4-16<br>27/507-513 |
|                                   | 5b     | Name and contact information for the trial sponsor                                                                                                                                                                                                                                       | 1/19-23              |
|                                   | 5c     | Role of study sponsor and funders, if any, in study design; collection, management, analysis, and interpretation of data; writing of the report; and the decision to submit the report for publication, including whether they will have ultimate authority over any of these activities | 27/507-513           |
|                                   | 5d     | Composition, roles, and responsibilities of the coordinating centre, steering committee, endpoint adjudication committee, data management team, and other individuals or groups overseeing the trial, if applicable (see Item 21a for data monitoring committee)                         | -                    |
| <b>Introduction</b>               |        |                                                                                                                                                                                                                                                                                          |                      |
| Background and rationale          | 6a     | Description of research question and justification for undertaking the trial, including summary of relevant studies (published and unpublished) examining benefits and harms for each intervention                                                                                       | 3/30-46              |
|                                   | 6b     | Explanation for choice of comparators                                                                                                                                                                                                                                                    | 7/133-139            |
| Objectives                        | 7      | Specific objectives or hypotheses                                                                                                                                                                                                                                                        | 7/137-139            |
| Trial design                      | 8      | Description of trial design including type of trial (eg, parallel group, crossover, factorial, single group), allocation ratio, and framework (eg, superiority, equivalence, noninferiority, exploratory)                                                                                | 8/143-145            |

|                                                                       |     |                                                                                                                                                                                                                                                                                                                                                                                |               |
|-----------------------------------------------------------------------|-----|--------------------------------------------------------------------------------------------------------------------------------------------------------------------------------------------------------------------------------------------------------------------------------------------------------------------------------------------------------------------------------|---------------|
| <b>Methods:<br/>Participants,<br/>interventions,<br/>and outcomes</b> |     |                                                                                                                                                                                                                                                                                                                                                                                |               |
| Study setting                                                         | 9   | Description of study settings (eg, community clinic, academic hospital) and list of countries where data will be collected. Reference to where list of study sites can be obtained                                                                                                                                                                                             | 8/143-145     |
| Eligibility criteria                                                  | 10  | Inclusion and exclusion criteria for participants. If applicable, eligibility criteria for study centres and individuals who will perform the interventions (eg, surgeons, psychotherapists)                                                                                                                                                                                   | 8-10/161-195  |
| Interventions                                                         | 11a | Interventions for each group with sufficient detail to allow replication, including how and when they will be administered                                                                                                                                                                                                                                                     | 14/209-217    |
|                                                                       | 11b | Criteria for discontinuing or modifying allocated interventions for a given trial participant (eg, drug dose change in response to harms, participant request, or improving/worsening disease)                                                                                                                                                                                 | 14/222-228    |
|                                                                       | 11c | Strategies to improve adherence to intervention protocols, and any procedures for monitoring adherence (eg, drug tablet return, laboratory tests)                                                                                                                                                                                                                              | 14/222-228    |
|                                                                       | 11d | Relevant concomitant care and interventions that are permitted or prohibited during the trial                                                                                                                                                                                                                                                                                  | -             |
| Outcomes                                                              | 12  | Primary, secondary, and other outcomes, including the specific measurement variable (eg, systolic blood pressure), analysis metric (eg, change from baseline, final value, time to event), method of aggregation (eg, median, proportion), and time point for each outcome. Explanation of the clinical relevance of chosen efficacy and harm outcomes is strongly recommended | 18-20/312-351 |
| Participant timeline                                                  | 13  | Time schedule of enrolment, interventions (including any run-ins and washouts), assessments, and visits for participants. A schematic diagram is highly recommended (see Figure)                                                                                                                                                                                               | 17-18/282-310 |
| Sample size                                                           | 14  | Estimated number of participants needed to achieve study objectives and how it was determined, including clinical and statistical assumptions supporting any sample size calculations                                                                                                                                                                                          | 13/199-207    |
| Recruitment                                                           | 15  | Strategies for achieving adequate participant enrolment to reach target sample size                                                                                                                                                                                                                                                                                            | 8/157, 197    |

|                                                                                     |     |                                                                                                                                                                                                                                                                                                                                                                                                              |                 |
|-------------------------------------------------------------------------------------|-----|--------------------------------------------------------------------------------------------------------------------------------------------------------------------------------------------------------------------------------------------------------------------------------------------------------------------------------------------------------------------------------------------------------------|-----------------|
| <b>Methods:<br/>Assignment of<br/>interventions<br/>(for controlled<br/>trials)</b> |     |                                                                                                                                                                                                                                                                                                                                                                                                              |                 |
| Allocation:                                                                         |     |                                                                                                                                                                                                                                                                                                                                                                                                              |                 |
| Sequence generation                                                                 | 16a | Method of generating the allocation sequence (eg, computer-generated random numbers), and list of any factors for stratification. To reduce predictability of a random sequence, details of any planned restriction (eg, blocking) should be provided in a separate document that is unavailable to those who enrol participants or assign interventions                                                     | .               |
| Allocation concealment mechanism                                                    | 16b | Mechanism of implementing the allocation sequence (eg, central telephone; sequentially numbered, opaque, sealed envelopes), describing any steps to conceal the sequence until interventions are assigned                                                                                                                                                                                                    | 15/234-239      |
| Implementation                                                                      | 16c | Who will generate the allocation sequence, who will enrol participants, and who will assign participants to interventions                                                                                                                                                                                                                                                                                    | 15/242          |
| Blinding (masking)                                                                  | 17a | Who will be blinded after assignment to interventions (eg, trial participants, care providers, outcome assessors, data analysts), and how                                                                                                                                                                                                                                                                    | 15/247-256      |
|                                                                                     | 17b | If blinded, circumstances under which unblinding is permissible, and procedure for revealing a participant's allocated intervention during the trial                                                                                                                                                                                                                                                         | 17/274278       |
| <b>Methods: Data collection, management, and analysis</b>                           |     |                                                                                                                                                                                                                                                                                                                                                                                                              |                 |
| Data collection methods                                                             | 18a | Plans for assessment and collection of outcome, baseline, and other trial data, including any related processes to promote data quality (eg, duplicate measurements, training of assessors) and a description of study instruments (eg, questionnaires, laboratory tests) along with their reliability and validity, if known. Reference to where data collection forms can be found, if not in the protocol | 20/353, 407-414 |
|                                                                                     | 18b | Plans to promote participant retention and complete follow-up, including list of any outcome data to be collected for participants                                                                                                                                                                                                                                                                           | -               |



|                                 |     |                                                                                                                                                                                                                                                                                                                                       |                        |
|---------------------------------|-----|---------------------------------------------------------------------------------------------------------------------------------------------------------------------------------------------------------------------------------------------------------------------------------------------------------------------------------------|------------------------|
|                                 |     | who discontinue or deviate from intervention protocols                                                                                                                                                                                                                                                                                |                        |
| Data management                 | 19  | Plans for data entry, coding, security, and storage, including any related processes to promote data quality (eg, double data entry; range checks for data values). Reference to where details of data management procedures can be found, if not in the protocol                                                                     | 22/428-437             |
| Statistical methods             | 20a | Statistical methods for analyzing primary and secondary outcomes. Reference to where other details of the statistical analysis plan can be found, if not in the protocol                                                                                                                                                              | 24/440-445             |
|                                 | 20b | Methods for any additional analyses (eg, subgroup and adjusted analyses)                                                                                                                                                                                                                                                              | 24/454-460             |
|                                 | 20c | Definition of analysis population relating to protocol non-adherence (eg, as randomized analysis), and any statistical methods to handle missing data (eg, multiple imputation)                                                                                                                                                       | -                      |
| <b>Methods: Monitoring</b>      |     |                                                                                                                                                                                                                                                                                                                                       |                        |
| Data monitoring                 | 21a | Composition of data monitoring committee (DMC); summary of its role and reporting structure; statement of whether it is independent from the sponsor and competing interests; and reference to where further details about its charter can be found, if not in the protocol. Alternatively, an explanation of why a DMC is not needed | -                      |
|                                 | 21b | Description of any interim analyses and stopping guidelines, including who will have access to these interim results and make the final decision to terminate the trial                                                                                                                                                               | -                      |
| Harms                           | 22  | Plans for collecting, assessing, reporting, and managing solicited and spontaneously reported adverse events and other unintended effects of trial interventions or trial conduct                                                                                                                                                     | 25/470-475             |
| Auditing                        | 23  | Frequency and procedures for auditing trial conduct, if any, and whether the process will be independent from investigators and the sponsor                                                                                                                                                                                           | 23/428-429             |
| <b>Ethics and dissemination</b> |     |                                                                                                                                                                                                                                                                                                                                       |                        |
| Research ethics approval        | 24  | Plans for seeking research ethics committee/institutional review board (REC/IRB) approval                                                                                                                                                                                                                                             | 26-27/488-491, 524-530 |

|                          |     |                                                                                                                                                                                                                                  |            |
|--------------------------|-----|----------------------------------------------------------------------------------------------------------------------------------------------------------------------------------------------------------------------------------|------------|
| Protocol amendments      | 25  | Plans for communicating important protocol modifications (eg, changes to eligibility criteria, outcomes, analyses) to relevant parties (eg, investigators, REC/IRBs, trial participants, trial registries, journals, regulators) | 26/493-501 |
| Consent or assent        | 26a | Who will obtain informed consent or assent from potential trial participants or authorised surrogates, and how (see Item 32)                                                                                                     | 16/258-263 |
|                          | 26b | Additional consent provisions for collection and use of participant data and biological specimens in ancillary studies, if applicable                                                                                            | -          |
| Confidentiality          | 27  | How personal information about potential and enrolled participants will be collected, shared, and maintained in order to protect confidentiality before, during, and after the trial                                             | 16/267-272 |
| Declaration of interests | 28  | Financial and other competing interests for principal investigators for the overall trial and each study site                                                                                                                    | 27/515-521 |
| Access to data           | 29  | Statement of who will have access to the final trial dataset, and disclosure of contractual agreements that limit such access for investigators                                                                                  | 26/493-496 |

# BMJ Open

## New prophylaxis regimen for SARS-CoV-2 infection in health professionals with low doses of Hydroxychloroquine and Bromhexine. A randomized, double-blind placebo clinical trial (ELEVATE Trial).

|                                 |                                                                                                                                                                                                                                                                                                                                                                                                                                                                                                                                                                                                                                                                                                                                                                                                                                                                                                                                                                                                                                                                                                                                                                                                                                                                                                                                                                                                          |
|---------------------------------|----------------------------------------------------------------------------------------------------------------------------------------------------------------------------------------------------------------------------------------------------------------------------------------------------------------------------------------------------------------------------------------------------------------------------------------------------------------------------------------------------------------------------------------------------------------------------------------------------------------------------------------------------------------------------------------------------------------------------------------------------------------------------------------------------------------------------------------------------------------------------------------------------------------------------------------------------------------------------------------------------------------------------------------------------------------------------------------------------------------------------------------------------------------------------------------------------------------------------------------------------------------------------------------------------------------------------------------------------------------------------------------------------------|
| Journal:                        | <i>BMJ Open</i>                                                                                                                                                                                                                                                                                                                                                                                                                                                                                                                                                                                                                                                                                                                                                                                                                                                                                                                                                                                                                                                                                                                                                                                                                                                                                                                                                                                          |
| Manuscript ID                   | bmjopen-2020-045190.R2                                                                                                                                                                                                                                                                                                                                                                                                                                                                                                                                                                                                                                                                                                                                                                                                                                                                                                                                                                                                                                                                                                                                                                                                                                                                                                                                                                                   |
| Article Type:                   | Protocol                                                                                                                                                                                                                                                                                                                                                                                                                                                                                                                                                                                                                                                                                                                                                                                                                                                                                                                                                                                                                                                                                                                                                                                                                                                                                                                                                                                                 |
| Date Submitted by the Author:   | 15-Feb-2021                                                                                                                                                                                                                                                                                                                                                                                                                                                                                                                                                                                                                                                                                                                                                                                                                                                                                                                                                                                                                                                                                                                                                                                                                                                                                                                                                                                              |
| Complete List of Authors:       | <p>GRANADOS-MONTIEL, JULIO; Instituto Nacional de Rehabilitacion Luis Guillermo Ibarra Ibarra, Tissue Engineering and Regenerative Medicine Unit</p> <p>Hazan-Lasri, Eric; Instituto Nacional de Rehabilitacion Luis Guillermo Ibarra Ibarra, Division of Traumatology, Emergencies and Bone Infections</p> <p>Franco-Cendejas, Rafael; Instituto Nacional de Rehabilitacion Luis Guillermo Ibarra Ibarra, Infectology Laboratory</p> <p>Chavez-Heres, Tatiana; Instituto Nacional de Rehabilitacion Luis Guillermo Ibarra Ibarra, Service, Hospital Epidemiological Surveillance Unit</p> <p>Silva-Bermudez, Phaedra; Instituto Nacional de Rehabilitacion Luis Guillermo Ibarra Ibarra, Tissue Engineering and Regenerative Medicine Unit</p> <p>Aguilar-Gaytan, Rocio; Instituto Nacional de Rehabilitacion Luis Guillermo Ibarra Ibarra, Tissue Engineering and Regenerative Medicine Unit</p> <p>Manzano-Leon, Natalia; Instituto Nacional de Cancerologia, Basic Division Research</p> <p>Méndez-Maldonado, Karla; Instituto Nacional de Rehabilitacion Luis Guillermo Ibarra Ibarra, Tissue Engineering and Regenerative Medicine Unit</p> <p>Alvarez-Arce, Alejandro; Instituto Nacional de Rehabilitación Luis Guillermo Ibarra Ibarra, Tissue Engineering and Regenerative Medicine Unit</p> <p>Martinez-Portilla, Raigam ; National Institute of Perinatology, Clinical research division</p> |
| <b>Primary Subject Heading</b>: | Health services research                                                                                                                                                                                                                                                                                                                                                                                                                                                                                                                                                                                                                                                                                                                                                                                                                                                                                                                                                                                                                                                                                                                                                                                                                                                                                                                                                                                 |
| Secondary Subject Heading:      | Evidence based practice, Global health, Medical publishing and peer review                                                                                                                                                                                                                                                                                                                                                                                                                                                                                                                                                                                                                                                                                                                                                                                                                                                                                                                                                                                                                                                                                                                                                                                                                                                                                                                               |
| Keywords:                       | INFECTIOUS DISEASES, PREVENTIVE MEDICINE, Clinical trials < THERAPEUTICS, COVID-19, CLINICAL PHARMACOLOGY                                                                                                                                                                                                                                                                                                                                                                                                                                                                                                                                                                                                                                                                                                                                                                                                                                                                                                                                                                                                                                                                                                                                                                                                                                                                                                |
|                                 |                                                                                                                                                                                                                                                                                                                                                                                                                                                                                                                                                                                                                                                                                                                                                                                                                                                                                                                                                                                                                                                                                                                                                                                                                                                                                                                                                                                                          |

1  
2  
3  
4  
5  
6  
7  
8  
9  
10  
11  
12  
13  
14  
15  
16  
17  
18  
19  
20  
21  
22  
23  
24  
25  
26  
27  
28  
29  
30  
31  
32  
33  
34  
35  
36  
37  
38  
39  
40  
41  
42  
43  
44  
45  
46  
47  
48  
49  
50  
51  
52  
53  
54  
55  
56  
57  
58  
59  
60





I, the Submitting Author has the right to grant and does grant on behalf of all authors of the Work (as defined in the below author licence), an exclusive licence and/or a non-exclusive licence for contributions from authors who are: i) UK Crown employees; ii) where BMJ has agreed a CC-BY licence shall apply, and/or iii) in accordance with the terms applicable for US Federal Government officers or employees acting as part of their official duties; on a worldwide, perpetual, irrevocable, royalty-free basis to BMJ Publishing Group Ltd ("BMJ") its licensees and where the relevant Journal is co-owned by BMJ to the co-owners of the Journal, to publish the Work in this journal and any other BMJ products and to exploit all rights, as set out in our [licence](#).

The Submitting Author accepts and understands that any supply made under these terms is made by BMJ to the Submitting Author unless you are acting as an employee on behalf of your employer or a postgraduate student of an affiliated institution which is paying any applicable article publishing charge ("APC") for Open Access articles. Where the Submitting Author wishes to make the Work available on an Open Access basis (and intends to pay the relevant APC), the terms of reuse of such Open Access shall be governed by a Creative Commons licence – details of these licences and which [Creative Commons](#) licence will apply to this Work are set out in our licence referred to above.

Other than as permitted in any relevant BMJ Author's Self Archiving Policies, I confirm this Work has not been accepted for publication elsewhere, is not being considered for publication elsewhere and does not duplicate material already published. I confirm all authors consent to publication of this Work and authorise the granting of this licence.

1  
2  
3 1 **New prophylaxis regimen for SARS-CoV-2 infection in health**  
4  
5 2 **professionals with low doses of Hydroxychloroquine and**  
6  
7 3 **Bromhexine: a randomized, double-blind placebo clinical trial**  
8  
9 4 **(ELEVATE Trial).**  
10  
11  
12 5

13  
14 6 Julio Granados-Montiel<sup>1\*</sup>, Eric Joseph Hazan Lasri<sup>2</sup>, Rafael  
15  
16 7 Franco Cendejas<sup>3</sup>, Tatiana Chávez Heres<sup>4</sup>, Phaedra Suriel Silva  
17  
18 8 Bermúdez<sup>1</sup>, Rocío Aguilar Gaytán<sup>1</sup>, Natalia Manzano-León<sup>5</sup>, Karla  
19  
20 9 Méndez-Maldonado<sup>1</sup>, Alejandro Alvarez-Arce<sup>1</sup>, Raigam J. Martinez-  
21  
22 10 Portilla<sup>6</sup>.  
23  
24  
25

26 11  
27  
28 12 <sup>1</sup> Tissue Engineering and Regenerative Medicine Unit. National  
29  
30 13 Institute of Rehabilitation. Mexico City, Mexico.

31  
32 14 <sup>2</sup> Division of Traumatology, Emergencies and Bone Infections.  
33  
34 15 National Institute of Rehabilitation. Mexico City, Mexico.

35  
36 16 <sup>3</sup> Infectology Laboratory. National Institute of Rehabilitation.  
37  
38 17 Mexico City, Mexico.

39  
40 18 <sup>4</sup> Service, Hospital Epidemiological Surveillance Unit. National  
41  
42 19 Institute of Rehabilitation. Mexico City, Mexico.

43  
44 20 <sup>5</sup> Basic Division Research, National Institute of Cancerology.  
45  
46 21 Mexico City, Mexico.

47  
48 22 <sup>6</sup> Clinical research division. National Institute of  
49  
50 23 Perinatology  
51  
52

53  
54  
55 24  
56  
57  
58  
59  
60

1  
2  
3 25 \*Corresponding author  
4

5 26 Julio Granados-Montiel. M.D.& Ph.D.  
6

7 27 Tissue Engineering and Regenerative Medicine Unit. National  
8

9 28 Institute of Rehabilitation  
10

11 29 Av. México-Xochimilco 289. Col. Arenal de Guadalupe, Tlalpan.  
12

13 30 14389, Mexico City, Mexico.  
14

15 31 ORCID ID: 0000-0002-0611-6421  
16

17 32 juliogram@gmail.com  
18

19 33  
20

21 34 Keywords: prophylaxis, SARS-CoV-2, COVID-19, health workers,  
22

23 35 hydroxychloroquine, bromhexine.  
24

25 36  
26

27 37  
28

29 38 Word count: 5,851  
30

31 39  
32

33 40  
34

35 41  
36

37 42  
38

39 43  
40

41 44  
42

43 45  
44

45 46  
46

47 47  
48

49 48  
50

1  
2  
3 494  
5 506  
7 518  
9 5210  
11 5312  
13  
14 54 **ABSTRACT**

15  
16  
17 55 **Introduction:** SARS-CoV-2 infection in Mexico has caused ~1  
18  
19 56 million confirmed cases; around 20-25% of health workers will  
20  
21 57 be infected by the virus at their workplace, with approximately  
22  
23 58 4.4% of mortality. High infectivity of SARS-CoV-2 is related  
24  
25 59 with cell entry mechanism, through the angiotensin-converting  
26  
27 60 enzyme (ACE) receptor. SARS-CoV-2 requires transmembrane  
28  
29 61 protease serine 2 (TMPRSS2) to cleave its spike glycoprotein  
30  
31 62 and ensure fusion of host cell and virus membrane. We propose  
32  
33 63 studying prophylactic treatment with hydroxychloroquine (HCQ)  
34  
35 64 and bromhexine (BHH), which have been shown to be effective in  
36  
37 65 preventing SARS-CoV-2 infection progression when administered  
38  
39 66 in early stages. The aim of this study is to assess the efficacy  
40  
41 67 of HCQ and BHH as prophylactic treatments for SARS-CoV-2  
42  
43 68 infection in healthy health workers exposed to the virus.

44  
45  
46 69 **Methods and analysis:** Double-blind randomized clinical trial,  
47  
48  
49 70 with parallel allocation at a 1:1 ratio with placebo, of low  
50  
51 71 doses of HCQ plus BHH, for 60 days. Study groups will be defined  
52  
53 72 as follows: 1) HCQ 200mg/d + BHH 8mg/8h vs 2) HCQ placebo plus  
54  
55  
56  
57  
58  
59  
60



1  
2  
3 73 BHH placebo. Primary endpoint will be efficacy of both  
4  
5 74 interventions for the prevention of SARS-CoV-2 infection,  
6  
7 75 determined by the risk ratio (RR) of infected personnel and  
8  
9 76 the absolute risk. At least a 16% reduction in absolute risk  
10  
11 77 is expected between the intervention and placebo groups; a  
12  
13 78 minimum of 20% infection is expected in the placebo group. The  
14  
15 79 sample size calculation estimated a total of 140 patients  
16  
17 80 assigned: two groups of 70 participants each.

21 **Ethics and dissemination:** This protocol has been approved by  
22  
23 82 the local Medical Ethics Committee (National Institute of  
24  
25 83 Rehabilitation 'Luis Guillermo Ibarra Ibarra', approval number  
26  
27 84 INRLGII/25/20) and by the Federal Commission for Protection  
28  
29 85 against Sanitary Risks (COFEPRIS, approval number  
30  
31 86 203300410A0058/2020). The results of the study will be  
32  
33 87 submitted for publication in peer-reviewed journals and  
34  
35 88 disseminated through conferences.

39 **Trial registration number 2a:** NCT04340349.

41 90 2b: NA

43 91 Protocol version: #3

45 92

### 48 93 **STRENGTHS AND LIMITATIONS OF THIS STUDY**

#### 50 94 *Strengths*

52  
53 95 ► This is a double-blind randomized single-centre clinical  
54  
55 96 trial, involving low doses of hydroxychloroquine and  
56  
57  
58  
59

1  
2  
3 97 bromhexine, adequately powered to provide clinically  
4  
5 98 relevant information regarding prophylactic treatment for  
6  
7 99 SARS-CoV-2 infection in health care personnel.  
8  
9

10 ▶ This study will include 140 participants who are health  
11  
12 101 workers exposed to SARS-CoV-2 patients with suspected or  
13  
14 102 confirmed infection, with short term follow-up (60 days).  
15

16  
17 103 ▶ A study of prophylactic treatment in this population is  
18  
19 104 of great value and could provide the basis for protecting  
20  
21 105 medical personnel around the world.  
22

23  
24 106 ▶ Bromhexine have minimal side effects and are commercially  
25  
26 107 available worldwide; findings could be applied in a timely  
27  
28 108 fashion in different regions.  
29

### 30 109 *Limitations*

31  
32  
33 110 ▶ Long-term use of hydroxychloroquine can cause heart rhythm  
34  
35 111 problems

36  
37 112 ▶ For the moment, people who are not candidates to receive  
38  
39 113 the vaccine, due to chronic diseases or severe allergies,  
40  
41 114 will not be included  
42  
43

### 44 115 **INTRODUCTION**

45  
46 116 In Mexico, up to February 2021, have been produced more than  
47  
48 117 1.9 millions confirmed cases and ~170,000 deaths have  
49  
50 118 arisen[1]. The age group ranging between 30 and 79 years is  
51  
52 119 the most highly affected, where 81% present mild symptoms, 14%  
53  
54  
55  
56  
57  
58  
59  
60

1  
2  
3 120 severe and 5% critical, requiring intensive care unit  
4  
5 121 management.

6  
7 122 SARS-CoV-2 is a single-stranded RNA virion, member of the  
8  
9 123 *Betacoronavirus* genus [2]. SARS-CoV-2 has an incubation period  
10  
11 124 between 3 to 10 days, with different incubation periods related  
12  
13 125 with different clinical symptoms [3,4] . It is transmitted  
14  
15 126 through respiratory droplets from infected humans and through  
16  
17 127 contact with contaminated fomites and aerosols; moreover, even  
18  
19 128 asymptomatic persons in close contact can transmit the disease  
20  
21 129 [5]. The mechanism through which the virus infects the  
22  
23 130 respiratory cell is due to the angiotensin-converting enzyme  
24  
25 131 protein 2 (ACE-2). This receptor is found in multiple tissues  
26  
27 132 such as the oral cavity, brain, kidneys, intestine, and  
28  
29 133 placenta [6-8].

30  
31 134 Health personnel is not exempt from contracting the disease.  
32  
33 135 In China, it was reported that 3.5-4.4% of the infected  
34  
35 136 population belonged to this group, and 14.8% presented  
36  
37 137 characteristics of severity or critical illness [4,9,10].  
38  
39 138 Italy, around 20% of healthcare professionals became infected  
40  
41 139 [11] ; mean age of health workers who died was 55 years (range  
42  
43 140 of 29-72 years) and mean period from hospital admission to  
44  
45 141 death was 19 days, (range 1-47 days) [9].

46  
47 142 Treatment of the SARS-Cov-2 infection has led different  
48  
49 143 research groups to work on the development of vaccines.  
50  
51  
52

1  
2  
3 144 However, the use of vaccines can be a challenge. Early trials  
4  
5 145 have shown minimal immune protection or long-term protection  
6  
7 146 is low. On the other hand, because the virus is RNA and the  
8  
9 147 mutation rate is high, we can expect new variants that reduce  
10  
11 148 or nullify the effectiveness of vaccines. Therefore, it is not  
12  
13 149 known if the vaccines that are now in the phase end of the  
14  
15 150 clinical study and those that are administered will work with  
16  
17 151 the same efficacy for the SARS-CoV-2 virus that gave rise to  
18  
19 152 Covid-19. On the other hand, around the world there are groups  
20  
21 153 of people who are against vaccination, or people that have  
22  
23 154 severe allergies, as well as populations that will take much  
24  
25 155 longer to reach the moment when they can acquire the vaccine,  
26  
27 156 so it is extremely necessary that people who do not vaccinate  
28  
29 157 by choice, by disease or by the lack of the vaccine, have an  
30  
31 158 alternative to avoid infection and avoid the spread of the  
32  
33 159 virus.

34  
35 160 Therefore, it is important to develop a pharmacological  
36  
37 161 strategy that allows the use of prophylactic drugs for the  
38  
39 162 prevention of SARS-CoV-2 infection.

40  
41 163 Chloroquine (CQ) and Hydroxychloroquine (HCQ) are known as an  
42  
43 164 antimalarial agent; HCQ is a hydroxylated derivative from CQ.  
44  
45 165 CQ and HCQ have gained attention as possible therapies in  
46  
47 166 Covid-19 disease. In overdose, both drugs can cause severe,  
48  
49 167 potentially life-threatening effects as visual disturbances,  
50  
51  
52  
53  
54  
55  
56  
57  
58  
59  
60

1  
2  
3 168 corneal opacities, irreversible retinopathy can occur with  
4  
5 169 cumulative doses exceeding 100 grams. When lower daily doses  
6  
7 170 (250 mg are used) retinopathy may not occur after many years  
8  
9 171 of treatment [12]. It has been reported in Cynomolgus Macaques  
10  
11 172 that the maximum concentration of HCQ was 293.33ng/mL in blood  
12  
13 173 and 36.90 ng/mL in plasma after single dose of 3 mg/kg [13].  
14  
15 174 HCQ has been used in several viral infections, for example, as  
16  
17 175 replication inhibitor for the dengue virus, decreasing in vitro  
18  
19 176 virus infection and promoting activation of different  
20  
21 177 immunological signal pathways [14]. It has also been used to  
22  
23 178 treat patients infected with hepatitis C virus decreasing viral  
24  
25 179 load, with minimal adverse effects reported [15]. HCQ has been  
26  
27 180 reported to block viral infection by increasing the endosomal  
28  
29 181 pH required for virus fusion to the cell, as well as interfere  
30  
31 182 with SARS-CoV-2 cell receptors, through inhibition of ACE2  
32  
33 183 glycosylation receptor [16-19]. HCQ has immunomodulatory  
34  
35 184 effects; it inhibits production and release of pro-inflammatory  
36  
37 185 cytokines, that are associated with severe disease development  
38  
39 186 [20,21] . Recently, it has been reported that HCQ works as a  
40  
41 187 autophagy inhibitor, interfering with viral infection and  
42  
43 188 replication [22]. There is recent evidence that HCQ could be  
44  
45 189 used to treat COVID-19; studies in high-risk patients show that  
46  
47 190 the use of HCQ was associated with a lower risk of intubation  
48  
49 191 or death [23]. Recent study showed that pre-treatment with HCQ  
50  
51  
52  
53  
54  
55  
56  
57  
58  
59  
60

1  
2  
3 192 has shown a better effect on antiviral activity [18] and it  
4  
5 193 has been reported that loading doses of 1600 mg HCQ followed  
6  
7 194 by 600 mg daily doses are needed have a relevant effect to  
8  
9 195 SARS-CoV-2 inhibition within 72 hours in 60% of COVID-19  
10  
11 196 patients [24]. Finally, a study where evaluated the antiviral  
12  
13 197 mechanisms of CQ and the adverse effects, repositioned the CQ  
14  
15 198 to have more efficacy when used as a prophylactic treatment  
16  
17 199 rather than as a therapeutic [25]. On the other hand, CQ and  
18  
19 200 HCQ has been reported to have various adverse effects, the CQ  
20  
21 201 being the most toxic in overdose. However, it was recently  
22  
23 202 published that *in vivo* trials are lacking to determine whether  
24  
25 203 this drug is useful as a prophylactic treatment against SARS-  
26  
27 204 Cov-2 [26]. Based on the above, do more studies will be  
28  
29 205 important to determine its effectiveness at low doses (<250  
30  
31 206 mg) as a prophylactic treatment.  
32  
33  
34  
35  
36  
37 207 Another pharmacological option to treat SARS-CoV-2 infection  
38  
39 208 is Bromhexine (BHH). BHH modifies the composition of mucus,  
40  
41 209 increases ciliary clearance and decreases coughing, improving  
42  
43 210 respiratory symptoms. It has also been reported to enhance the  
44  
45 211 effects of some antibiotics [27]. The mechanism by which SARS-  
46  
47 212 CoV-2 enters human cells depends on the ACE-2 receptor and the  
48  
49 213 human transmembrane serine protease (TMPRSS2), on which BHH  
50  
51 214 has a specific inhibitory effect [28,29]. BHH has been used to  
52  
53 215 treat pneumonic damage in both lungs during early infection  
54  
55  
56  
57  
58  
59  
60

1  
2  
3 216 [30]. BHH turns out to be an ideal candidate for SARS-CoV-2  
4  
5 217 treatment, since it has few contraindications, and its side  
6  
7 218 effects are minimal, demonstrating an extensive margin of  
8  
9 219 pharmacological safety. BHH is widely available over the  
10  
11 220 counter, and its low cost makes it an ideal therapeutic option.  
12  
13 221 According to a letter published in the New England Journal of  
14  
15 222 Medicine, of 77,262 patients infected by SARS-CoV-2, 3387  
16  
17 223 (4.4%) were health workers [9]. Of these, 23 have died from  
18  
19 224 this disease. The prevalence of infections in health personnel  
20  
21 225 is alarming since health services in first world countries have  
22  
23 226 been overwhelmed by this disease. In Italy, around 20% of  
24  
25 227 health professionals had a SARS-CoV-2 infection [11]. Faced  
26  
27 228 with a highly contagious disease, the care of health workers,  
28  
29 229 who are first line of contact and on whom the health system of  
30  
31 230 each country depends, is essential. This research regarding  
32  
33 231 the use of HCQ and BHH in health personnel will allow us to  
34  
35 232 determine and compare the effectiveness of both interventions,  
36  
37 233 which is of vital importance to clarify whether these  
38  
39 234 treatments may prevent the appearance of infection in this  
40  
41 235 population. Describing for the first time that HCQ plus BHH  
42  
43 236 could function for disease prevention, would allow us to  
44  
45 237 provide prophylaxis to health professionals worldwide.  
46  
47 238 Therefore, the use of HCQ and BHH in healthy health personnel  
48  
49  
50  
51  
52  
53  
54  
55  
56  
57  
58  
59  
60

239 exposed to patients with confirmed or suspected SARS-CoV-2 will  
240 significantly reduce infection.

241

242

243

244

245

## 246 **METHODS AND ANALYSIS**

### 247 **Study design**

248 Double-blind randomized clinical trial, with parallel  
249 allocation at a 1:1 ratio with HCQ + BHH vs placebo for both  
250 drugs for 60 days, to determine the efficacy of the combined  
251 drugs for the prevention of SARS-CoV-2 infection in healthcare  
252 workers.

253

254

### 255 **Participants**

256 The study will be carried out at the "Instituto Nacional de  
257 Rehabilitación, Luis Guillermo Ibarra Ibarra" (INR-LGII). This  
258 institution is a tertiary hospital that at this time has not  
259 been designated as a COVID-19 centre. The Mexican government  
260 defined 3 phases to determine risk for SARS-CoV-2 infection:  
261 imported cases from outside Mexico; community infection and  
262 spread of the disease throughout the country (also known as



1  
2  
3 263 Phase 3). In the latter, it is assumed that every person who  
4  
5 264 enters a hospital is a potentially infected carrier; currently  
6  
7 265 our centre is in Phase 3. Likewise, health personnel who work  
8  
9 266 at the “Instituto Nacional de Ciencias Médicas y Nutrición,  
10  
11 267 Salvador Zubirán” (INCMNSZ), which is a COVID-19 designated  
12  
13 268 tertiary centre, and who meet inclusion criteria of the  
14  
15 269 protocol will be invited to participate in the study.

16  
17  
18 270 Inclusion of participants will be assessed according to the  
19  
20 271 eligibility criteria. Table 1 shows the classification and  
21  
22 272 characteristics of study variables. Continuous variables will  
23  
24 273 be assessed for normality. Variables with a normal distribution  
25  
26 274 will be compared using Student's t-test, non-parametric  
27  
28 275 variables using the Mann-Whitney U-test. Categorical variables  
29  
30 276 will be evaluated using the Chi-squared test.

31  
32  
33  
34  
35 277 *Inclusion criteria*

- 36  
37 278 ▶ Health personnel working at INR LGII or INCMNSZ who wish  
38  
39 279 to participate in the study and sign the informed consent.  
40  
41 280 ▶ Over 18 and under 60 years of age, both genders.  
42  
43 281 ▶ Contacting with suspected or confirmed SARS-CoV-2  
44  
45 282 infection.  
46  
47 283 ▶ Normal electrocardiogram.

48  
49  
50 284 *Exclusion criteria*

- 1  
2  
3 285 ▶ Positive quantitative reverse transcriptase-polymerase  
4  
5 286 chain reaction (qRT-PCR) test for SARS-CoV-2 at the time  
6  
7 287 of inclusion.  
8  
9  
10 288 ▶ Panel of IgG or IgM antibodies positive for SARS-CoV-2 at  
11  
12 289 the time of inclusion.  
13  
14 290 ▶ Development of respiratory symptoms suspicious of SARS-  
15  
16 291 CoV-2 infection during the first 7 days after treatment  
17  
18 292 is initiated, confirmed by qRT-PCR and IgG or IgM  
19  
20 293 antibodies postiver for SARS-CoV-2.  
21  
22  
23 294 ▶ Health personnel with comorbidities such as diabetes,  
24  
25 295 hypertension, autoimmune diseases (i.e., porphyria,  
26  
27 296 psoriasis, systemic lupus erythematosus), obesity  
28  
29 297 (defined as body mass index  $\geq 30$ ), cardiovascular diseases,  
30  
31 298 respiratory diseases (such as asthma, chronic bronchitis,  
32  
33 299 idiopathic pulmonary fibrosis).  
34  
35  
36 300 ▶ History of allergies to any hydroxychloroquine or  
37  
38 301 bromhexine related compound or medication.  
39  
40  
41 302 ▶ Use of immunosuppressors for any reason.  
42  
43  
44 303 ▶ History of bone marrow transplant.  
45  
46  
47 304 ▶ Known glucose-6-phosphate dehydrogenase deficiency.  
48  
49 305 ▶ Chronic kidney disease or glomerular filtration  
50  
51 306  $< 20$ ml/min.  
52  
53  
54  
55  
56  
57  
58  
59  
60

- 1  
2  
3 307 ▶ Use of other drugs with reported pharmacological  
4  
5 308 interactions (i.e., digitalis, flecainide, amiodarone,  
6  
7 309 procainamide, or propafenone).  
8  
9  
10 310 ▶ History of long QT syndrome.  
11  
12 311 ▶ Electrocardiogram with QTc>500 msec.  
13  
14 312 ▶ Pregnant or breastfeeding personnel.  
15  
16 313 ▶ Epilepsy.  
17  
18 314 ▶ Known liver disease.  
19  
20 315 ▶ Personnel who have received the Covid-19 vaccine  
21  
22  
23

24 316 *Elimination criteria*

- 25  
26 317 ▶ Personnel who decide to leave the study for any reason  
27  
28 318 not related to adverse events.  
29  
30 319 ▶ Personnel with incomplete information on the primary  
31  
32 320 outcome (qRT-PCR for SARS-CoV-2).  
33  
34 321 ▶ Personnel who are relocated to work in another  
35  
36 322 institution.  
37  
38 323 ▶ Personnel who do not wish to participate in the study  
39  
40  
41  
42  
43  
44

45 325 **Table 1.** Classification and characteristics of study variables.

| Variable | Conceptual definition                   | Operational definition | Type                   |
|----------|-----------------------------------------|------------------------|------------------------|
| Age      | Date at recruitment minus date of birth | Years of age           | Quantitative           |
| Gender   | Male or female genotype of the person   | Male/female            | Qualitative<br>nominal |

|                 |                                                                                     |                                                                                                                                 |                         |
|-----------------|-------------------------------------------------------------------------------------|---------------------------------------------------------------------------------------------------------------------------------|-------------------------|
| Weight          | How much the patient weighs at the time of study inclusion                          | Weight, kilograms                                                                                                               | Continuous quantitative |
| Size            | How tall is the patient from head to toe at the time of study inclusion             | Height, centimetres                                                                                                             | Continuous quantitative |
| Body mass index | The division between weight by height squared at the time of inclusion in the study | Units of Kg/cm <sup>2</sup>                                                                                                     | Continuous quantitative |
| Occupation      | Remunerative work performed by the participant at the time of recruitment           | Unemployed, informal, unskilled employee, micro-entrepreneur or saleswoman, administrative employee, professional, entrepreneur | Qualitative nominal     |
| Civil status    | Civil status of the individual                                                      | Married, single, widowed, divorced, common-law union                                                                            | Qualitative nominal     |
| Level of study  | Years completed and approved at the time of study recruitment                       | No studies, primary, secondary, preparatory, technical career, undergraduate, postgraduate                                      | Ordinal qualitative     |
| Alcohol intake  | Consumption of alcoholic beverages                                                  | Intake of alcoholic beverages                                                                                                   | Qualitative nominal     |

|                      |                                                                                                                                                               |                                                 |                     |
|----------------------|---------------------------------------------------------------------------------------------------------------------------------------------------------------|-------------------------------------------------|---------------------|
| Smoking habit        | Habitual tobacco uses at the time of recruitment                                                                                                              | Number of packs of cigarettes consumed per day. | Quantitative        |
| Drug's use           | Regular use of chemicals such as amphetamines, cocaine, marijuana, LSD, heroin, glass                                                                         | Consumption of drugs                            | Qualitative nominal |
| Hypertension         | Elevation of blood pressure >130/80                                                                                                                           | Positive/negative                               | Qualitative nominal |
| Asthma               | Chronic inflammatory disease characterized by bronchial hyperactivity with recurrent episodes of bronchospasm                                                 | Positive/negative                               | Qualitative nominal |
| Diabetes             | Group of metabolic diseases, which occurs when the pancreas does not produce enough insulin or when the body does not use the insulin it produces effectively | Positive/negative                               | Qualitative nominal |
| Obesity              | Pathological state characterized by a general excess or excessive accumulation of fat in the body                                                             | Positive/negative                               | Qualitative nominal |
| SARS-CoV-2 pneumonia | A form of severe pneumonia caused by coronavirus                                                                                                              | Positive/negative                               | Qualitative nominal |
| Death                | Statistical term that describes the death of an individual                                                                                                    | Positive/negative                               | Qualitative nominal |
| Intensive Care Unit  | Special facility in a hospital area, which provides life support to critically ill                                                                            | Positive/negative                               | Qualitative nominal |

|                  |                                                                                                                                                                                                                                                                                                                                                                                                                                                                                                                                                  |                   |                     |
|------------------|--------------------------------------------------------------------------------------------------------------------------------------------------------------------------------------------------------------------------------------------------------------------------------------------------------------------------------------------------------------------------------------------------------------------------------------------------------------------------------------------------------------------------------------------------|-------------------|---------------------|
|                  | patients, requiring intensive supervision and monitoring                                                                                                                                                                                                                                                                                                                                                                                                                                                                                         |                   |                     |
| Severe pneumonia | Defined by the American Thoracic Society Criteria requiring at least one main criterion (need for invasive mechanical ventilation and shock with need for vasopressors), or three minor criteria (respiratory rate > 30 bpm, PaO <sub>2</sub> / FiO <sub>2</sub> ratio <250, infiltrates multilobars, confusion / disorientation, uremia [BUN > 20 mg / dL], leukopenia [ $<4,000$ ], thrombocytopenia [ $<100,000$ platelets / mm <sup>3</sup> ], hypothermia [core temperature <36°C], or hypotension requiring aggressive fluid resuscitation | Positive/negative | Qualitative nominal |
| Pneumonia        | Acute infection of the lung parenchyma, accompanied by bilateral infiltrates on chest X-ray                                                                                                                                                                                                                                                                                                                                                                                                                                                      | Positive/negative | Qualitative nominal |
| Confusion        | Glasgow scale less than 15                                                                                                                                                                                                                                                                                                                                                                                                                                                                                                                       | Positive/negative | Qualitative nominal |
| Hypothermia      | Body temperature less than 36 degrees Celsius                                                                                                                                                                                                                                                                                                                                                                                                                                                                                                    | Positive/negative | Qualitative nominal |
| Thrombocytopenia | Total platelets less than 100,000 per mm <sup>3</sup> .                                                                                                                                                                                                                                                                                                                                                                                                                                                                                          | Positive/negative | Qualitative nominal |

|                                                         |                                                                                                                                                                                                       |                   |                     |
|---------------------------------------------------------|-------------------------------------------------------------------------------------------------------------------------------------------------------------------------------------------------------|-------------------|---------------------|
| Arterial hypotension                                    | Systolic blood pressure less than 90 mmHg or mean arterial pressure less than 60 mmHg                                                                                                                 | Positive/negative | Qualitative nominal |
| Sepsis                                                  | Rapid SOFA score (qSOFA) with 2 of the following three clinical variables: Glasgow $\leq 13$ , systolic pressure $\leq 100$ mm Hg, or respiratory rate $\geq 22$ bpm                                  | Positive/negative | Qualitative nominal |
| qRT-PCR for SARS-CoV-2                                  | Molecular diagnosis for SARS-CoV-2 from viral RNA                                                                                                                                                     | Positive/negative | Qualitative nominal |
| Septic shock                                            | Arterial hypotension that persists after resuscitation volume and that requires vasopressors to maintain MAP $\geq 65$ mm Hg and lactate $\geq 2$ mmol / L (18 mg / dL) in the absence of hypovolemia | Positive/negative | Qualitative nominal |
| Adverse events related to the use of Hydroxychloroquine | Indirect drug-related mortality, nausea, vomiting, abdominal pain, rash, itchy skin, hair loss, QT segment elongation on electrocardiogram, corneal opacity, cardiac arrhythmias, and heart failure   | Positive/negative | Qualitative nominal |
| Adverse events related to the use of Bromhexine         | Indirect drug-related mortality, nausea, vomiting, abdominal pain, rash, diarrhea.                                                                                                                    | Positive/negative | Qualitative nominal |

326

327 **Sample size calculation**

1  
2  
3 328 According to the study by Remuzzi A et al. [11], the proportion  
4  
5 329 of healthcare workers infected with SARS-CoV-2 and confirmed  
6  
7 330 by RT-PCR was 20%. Taking this 20% as our null hypothesis, we  
8  
9 331 estimate that the proportion of infections in the intervention  
10  
11 332 group will be 4%. Using a two-tailed test, with a type I error  
12  
13 333 of 0.05, a power of 90%, and taking into account a loss of 10%  
14  
15 334 of participants for each group, we estimate that a total of  
16  
17 335 214 participants will be required, distributed in parallel  
18  
19 336 groups (1:1) of 107 each. This number of volunteers will allow  
20  
21 337 us to find a difference of 16% between groups with a power of  
22  
23 338 90% and an attrition of 20%. To ensure that desired sample  
24  
25 339 size is reached, all health workers involved in managing  
26  
27 340 patients suspected or infected by SARS-CoV-2 will be invited  
28  
29 341 personally and by institutional email.  
30  
31  
32  
33  
34  
35  
36

### 37 343 **Interventions**

38  
39 344 Interventions will consist of low doses of HCQ 200 mg tablets  
40  
41 345 every 24 hours for 60 days plus BHH 8 mg tablets every 8  
42  
43 346 hours for 60 days. Study groups will be defined as follows: 1)  
44  
45 347 HCQ plus BHH vs placebo for both drugs. Fabrication of both  
46  
47 348 drugs and placebos will be provided to our centre by a hired  
48  
49 349 laboratory. Both drugs will be provided to participants  
50  
51 350 directly at the hospital by a researcher blinded to group  
52  
53 351 assignment process. To ensure that the intervention is carried  
54  
55  
56  
57  
58  
59  
60



1  
2  
3 352 out, each participant will be asked to keep a written record  
4  
5 353 of the days and time the medication was administered. This  
6  
7 354 document will be reviewed weekly to verify that more than 50%  
8  
9 355 adherence to treatment is maintained. Participants will be  
10  
11 356 asked to record any symptoms related to the use of the  
12  
13 357 medication, which will be reviewed by a researcher blinded to  
14  
15 358 group assignment, weekly, or at the participants' request.  
16  
17  
18  
19  
20

21 360 If any of the participants present symptoms of SARS-CoV-2  
22  
23 361 infection after the first 14 days from the beginning of the  
24  
25 362 intervention or positive qRT-PCR is present, the drug will not  
26  
27 363 be discontinued. If the participant presents adverse events  
28  
29 364 related to the drugs that are severe or intolerable, treatment  
30  
31 365 will not be suspended. If the participants report an adherence  
32  
33 366 of less than 50% of the medication, the intervention will not  
34  
35 367 be discontinued to avoid imbalances between groups. Use of  
36  
37 368 drugs that interact with HCQ or BHH such as flecainide,  
38  
39 369 digitalis, amiodarone, procainamide or propafenone will be  
40  
41 370 prohibited. If a participant has to use these drugs during the  
42  
43 371 study period, they will be eliminated from the study. A free  
44  
45 372 diet and outdoor activity will be allowed since these do not  
46  
47 373 intervene with the implementation of the treatment or have  
48  
49 374 interaction with the drugs used. Finally, incidence of adverse  
50  
51 375 events such as nausea, vomiting, abdominal pain, rash, itchy  
52  
53  
54  
55  
56  
57  
58  
59  
60

1  
2  
3 376 skin, hair loss, lengthening of the QT interval in the  
4  
5 377 electrocardiogram, corneal opacity, cardiac arrhythmias, heart  
6  
7 378 failure and death will be determined.  
8  
9

10 379

11  
12 380 **Randomization and treatment allocation**  
13

14 381 Group randomization will be in a centralized and  
15  
16 382 straightforward way using the Web program  
17  
18 383 www.randomization.com. It will be carried out independently by  
19  
20 384 a researcher blinded to inclusion criteria, delivery of  
21  
22 385 medication, participant follow-up, results, statistical  
23  
24 386 analysis, and writing of the final manuscript. Allocation will  
25  
26 387 be established, for 214 participants in blocks of 107 assigned.  
27  
28 388 The selection of health workers will be made regardless of the  
29  
30 389 hospital shift, work schedule, or assigned area. If the desired  
31  
32 390 sample size is not reached, the inclusion of personnel involved  
33  
34 391 in the first line of care of other referral hospitals for  
35  
36 392 patients with SARS-CoV-2 will be considered.

37  
38 393 An independent researcher will allocate patients to the desired  
39  
40 394 groups. Envelopes will be correctly sealed by the pharmacy  
41  
42 395 department and will contain HCQ plus BHH or placebos as  
43  
44 396 previously mentioned. In those who do not require HCQ and BHH,  
45  
46 397 the drug will be replaced by tablets identical in colour and  
47  
48 398 taste but lacking the active substance. In this way, drugs used  
49  
50 399 in both groups will be indistinguishable.  
51  
52  
53  
54  
55  
56  
57  
58  
59  
60

1  
2  
3 400  
4

5 401 Researcher A will recruit the participants and assess the  
6  
7 402 inclusion criteria according to the serological,  
8  
9 403 electrocardiographic, biochemical results and clinical  
10  
11 404 investigation. Once included, volunteers will go to another  
12  
13 405 office with researcher B, who will be blinded to the first  
14  
15 406 procedure and the rest of the study. Researcher B will assign  
16  
17 407 the groups independently, centrally, and through the use of  
18  
19 408 the web program. This same researcher will be the one who makes  
20  
21 409 the packages indistinguishable to the person providing the  
22  
23 410 drugs to the participant. Researcher C will provide treatment  
24  
25 411 in a sealed envelope or box to the participant in the order of  
26  
27 412 assignment, without knowing each participant's study group.  
28  
29 413 This researcher will also be blinded to the rest of the results.  
30  
31 414 Participants will be blinded to the treatment they will  
32  
33 415 receive. The researchers performing follow-up, researchers for  
34  
35 416 result assessment, and the researcher who performs the  
36  
37 417 statistical analysis will be blinded.  
38  
39  
40  
41  
42  
43

44 418

45  
46 419 Informed consent will be obtained only by researcher A. If  
47  
48 420 researcher A is not available, the study administrator may  
49  
50 421 obtain informed consent for participation. The informed consent  
51  
52 422 will contain the authorization to participate in the study and  
53  
54 423 the authorization for taking biological samples,  
55  
56  
57  
58  
59  
60

1  
2  
3 424 electrocardiogram, and authorization to handle personal  
4  
5 425 information. All participants will complete a written informed  
6  
7 426 consent included on the first page of the questionnaire that  
8  
9 427 requires permission to participate in the study. No candidate  
10  
11 428 is required to participate in the study, and their  
12  
13 429 participation is based on the agreement that they may withdraw  
14  
15 430 at any time. All participants have the right to withdraw from  
16  
17 431 the study if they feel uncomfortable answering a question or  
18  
19 432 with a test to be performed. Also, no one, including the  
20  
21 433 research team, will require a reason why the participant  
22  
23 434 decides to leave the study.

24  
25  
26 435 In order to protect participant confidentiality, each one will  
27  
28 436 be assigned a participation number, and all biological samples,  
29  
30 437 as well as medical history information, will be identified by  
31  
32 438 the participant's initials and participant number. Part of the  
33  
34 439 confidentiality protection process will include data capture  
35  
36 440 only by the researcher in charge of data capture (researcher  
37  
38 441 D), who will be the same for all participants and the entire  
39  
40 442 study. Secondly, the study administrator may also enter data  
41  
42 443 into the database if researcher D is unavailable.

43  
44  
45 444

46  
47  
48 445 The study administrator will be blinded to allocation and  
49  
50 446 results of the participants. However, the administrator will  
51  
52 447 be the only one who will be able to reveal the group and  
53  
54  
55  
56  
57  
58  
59  
60

1  
2  
3 448 treatment assignment in any of the cases: major adverse events  
4  
5 449 such as cardiac arrhythmias, heart failure, major neurological  
6  
7 450 abnormalities, atrial or ventricular fibrillation, kidney  
8  
9 451 failure, or any adverse event related to pharmacological  
10  
11 452 treatment that endangers the life or any organ of the  
12  
13 453 participant's body. The objective of revealing the assignment  
14  
15 454 by the study administrator will be to provide the participant  
16  
17 455 of a timely treatment according to the drugs ingested.  
18  
19  
20  
21  
22

#### 23 457 **Participant timeline and intervention**

24  
25 458 The inclusion of participants will be evaluated according to  
26  
27 459 the eligibility criteria and by invitation. Volunteers who wish  
28  
29 460 to participate in the study will be summoned the next day at a  
30  
31 461 specialized office to carry out all the relevant studies to  
32  
33 462 ensure the inclusion criteria. These include a medical history,  
34  
35 463 anthropometric measurements such as weight and body mass index,  
36  
37 464 electrocardiogram (at days 30, 60 and 90 or whe the participant  
38  
39 465 requests it if they have any discomfort), hematic biometry,  
40  
41  
42 466 complete blood chemistry, and serological test for antibodies  
43  
44 467 and qRT-PCR for SARS-CoV-2. Volunteers will be asked for  
45  
46  
47 468 information to contact them once the serological results are  
48  
49  
50 469 obtained.

51  
52  
53 470 Once the results are obtained (approximately 3 days), personnel  
54  
55 471 eligible to participate in the study will be contacted. They  
56  
57  
58  
59  
60

1  
2  
3 472 will meet in a particular office to speak with a researcher  
4  
5 473 who will be in charge of carrying out the eligibility criteria  
6  
7 474 and medical history checklist. This researcher will be  
8  
9 475 different from the one who makes the assignment, who delivers  
10  
11 476 the medicine and the one who evaluates the results and performs  
12  
13 477 the statistical analysis. The assignment of the group of each  
14  
15 478 participant will be performed, and the participant will not  
16  
17 479 know the group they have been assigned. This information will  
18  
19 480 be known for the researcher in charge, unrelated to the  
20  
21 481 delivery of the treatment, results, or inclusion of the  
22  
23 482 participant in the study. After the assignment, the volunteers  
24  
25 483 will receive the assigned treatment at the pharmacy using a  
26  
27 484 code in a sealed envelope assigned by the Web. Participants  
28  
29 485 who meet the inclusion criteria and there is no reason for  
30  
31 486 exclusion will proceed to the second phase of group assignment  
32  
33 487 with researcher B, the next business day at a different time  
34  
35 488 or office than researcher A.  
36  
37  
38  
39  
40  
41  
42  
43

44 490 The group of researchers in charge of monitoring the  
45  
46 491 participants, who will be blinded to the group assignment at  
47  
48 492 all times, will be in charge of assessing each participant's  
49  
50 493 adverse event and treatment adherence record weekly. These  
51  
52 494 follow-up researchers will be available 24 hours a day  
53  
54 495 throughout the week if participants experience undesirable  
55  
56  
57  
58  
59  
60

1  
2  
3 496 adverse events that require urgent attention or that do not  
4  
5 497 allow them to continue with drug treatment. If this situation  
6  
7 498 happens, the researcher in charge of the follow-up will contact  
8  
9 499 the study administrator to reveal to the treating physicians  
10  
11 500 the treatment received by the participant. Health evaluation  
12  
13 501 of all participants will be performed at day 30, day 60 and  
14  
15 502 day 90, this includes electrocardiogram analysis, blood  
16  
17 503 chemistry analysis, antibody test, qRT-PCR, or at request of  
18  
19 504 the participant due to adverse clinical symptoms.  
20  
21  
22

23 505 At the end of the first 60 days, a new qRT-PCR will be requested  
24  
25 506 from each participant. All participants who present symptoms  
26  
27 507 after the first 7 days of initiation of the intervention, will  
28  
29 508 be considered as a positive individual for the analysis and  
30  
31 509 will not be excluded from the study. The same action will be  
32  
33 510 carried out 90 days after the start of treatment for both  
34  
35 511 groups. After 60 days, the treatment will be suspended and the  
36  
37 512 results of the qRT-PCR samples for SARS-CoV-2 will be  
38  
39 513 evaluated. After finishing the intervention (60 days), all  
40  
41 514 participants will be followed-up 30 more days with a new qRT-  
42  
43 515 PCR at day 90 after initiation of the intervention and 30 days  
44  
45 516 after the end of the intervention, to assess the efficacy or  
46  
47 517 the treatment during the follow-up period.  
48  
49  
50  
51

52  
53 518

54  
55 519 **Outcome measures**  
56  
57  
58  
59  
60

1  
2  
3 520 This study compares the efficacy of the use of HCQ plus BHH  
4  
5 521 (as a conjoined treatment) in prophylactic doses for 60 days  
6  
7 522 in healthy health personnel exposed to the first line of care  
8  
9 523 in confirmed patients with suspected infection by SARS-CoV-2.

11  
12 524

13  
14 525 *Primary endpoint*

15  
16 526 The primary endpoint will be the proportion of health personnel  
17  
18 527 infected by SARS-CoV-2 at 60 days after starting treatment, in  
19  
20 528 all groups. The infection will be diagnosed using qRT-PCR for  
21  
22 529 SARS-CoV-2 and IgM and IgG antibodies anti-SARS-CoV-2 after  
23  
24 530 day 7 of treatment. All participants presenting symptoms with  
25  
26 531 positive qRT-PCR after 7 days of initiation of the  
27  
28 532 intervention, will be considered positive and will be included  
29  
30 533 in the analysis. The study period will be 90 days (60 days for  
31  
32 534 the primary end point plus 30 days of follow-up). The  
33  
34 535 proportion of infected personnel will be evaluated using  
35  
36 536 relative risk (RR) and absolute risk increase (ARI) with their  
37  
38 537 respective 95% confidence intervals, in the established time.  
39  
40 538 The disease-free period in the 60 days will also be evaluated  
41  
42 539 by analysing the cumulative incidence of healthy personnel,  
43  
44 540 and the presence of confirmed infection by qRT-PCR of SARS-  
45  
46 541 CoV-2 and IgM and IgG antibodies anti-SARS-CoV-2 will be the  
47  
48 542 outcome. The censoring variable will be the discontinuation of  
49  
50 543 treatment either due to death, adverse events, or any  
51  
52  
53  
54  
55  
56  
57  
58  
59  
60



1  
2  
3 544 elimination criteria. Since there is the possibility of false  
4  
5 545 positives and negatives with qRT-PCR, we will perform  
6  
7 546 qualitative measurements of IgM and IgG with the Elecsys® Anti-  
8  
9 547 SARS-CoV-2 test from Roche laboratories.  
10  
11

12 548

13  
14 549 *Secondary endpoints*  
15

16  
17 550 The secondary endpoint will be the proportion of health  
18  
19 551 personnel infected 90 days after starting treatment in all  
20  
21 552 groups. The infection will be diagnosed using qRT-PCR for SARS-  
22  
23 553 CoV-2 and IgM and IgG antibodies anti-SARS-CoV-2 after day 7  
24  
25 554 of the start of treatment. The study period will be 90 days.  
26  
27 555 The proportion of infected personnel will be evaluated using  
28  
29 556 RR and ARI with their respective 95% confidence intervals, in  
30  
31 557 the established time. The disease-free period in the 90 days  
32  
33 558 will also be evaluated by analysing the cumulative incidence  
34  
35 559 of healthy personnel, and the presence of confirmed infection  
36  
37 560 by qRT-PCR of SARS-CoV-2 will be the outcome. The censoring  
38  
39 561 variable will be the discontinuation of treatment either due  
40  
41 562 to death, adverse events, or any elimination criteria.  
42  
43

44  
45 563 Also, secondary outcomes will be, in case of a positive SARS-  
46  
47 564 CoV-2 result, the need for oxygen use, admission to the  
48  
49 565 intensive care unit (ICU), presence of pneumonia by computer  
50  
51 566 tomography scan (CT), death, severe pneumonia defined by the  
52  
53  
54  
55  
56  
57  
58  
59  
60

1  
2  
3 567 American Thoracic Association, time from hospitalization to  
4  
5 568 recovery in days.  
6

7 569 Another secondary endpoint will be adverse events, defined as  
8  
9 570 the presence of any of the following during the study period:  
10  
11 571 death, nausea, vomiting, abdominal pain, diarrhea, rash, itchy  
12  
13 572 skin, hair loss, lengthening of the QT interval in the  
14  
15 573 electrocardiogram (>500msec), corneal opacity, cardiac  
16  
17 574 arrhythmias, heart failure or kidney failure (renal clearance  
18  
19 575 <20ml/min). The proportion of the compound of adverse events  
20  
21 576 between the groups will be analyzed using RR and ARI for 60 days  
22  
23 577 with their respective 95% confidence intervals.  
24  
25  
26  
27

28 578

29  
30 579 The efficacy of the treatment will be established as the  
31  
32 580 proportion of volunteers infected with SARS-CoV-2. This  
33  
34 581 difference should be sufficient to avoid overlapping of the  
35  
36 582 95% confidence intervals. It will be considered effective if  
37  
38 583 the intervals do not overlap and ineffective if when comparing  
39  
40 584 groups, they have a proportion of infected whose confidence  
41  
42 585 intervals overlap. This type of evaluation will allow an  
43  
44 586 adequate understanding of the efficacy of the treatment in both  
45  
46 587 groups.  
47  
48  
49

50 588

51 589

52 590

1  
2  
3 591  
4

5 592 **Handling and storage of data and documents**  
6

7 593 Before the start of the study, the researchers in charge of  
8  
9 594 the recruitment, assignment, and delivery of drugs will be  
10  
11 595 trained to perform the task assigned to them at least 3 days  
12  
13 596 before the start of the study.  
14

15  
16 597 Researcher A will assess the eligibility criteria of potential  
17  
18 598 participants and perform a detailed clinical examination to  
19  
20 599 assess whether they can participate in the study. The data that  
21  
22 600 will be collected initially will be the following:  
23

24  
25 601  
26

27  
28 602 ► Medical history (includes personal data): study  
29  
30 603 identifier number, history number, name, date of birth,  
31  
32 604 gender, occupation, marital status, nationality, current  
33  
34 605 residence, degree of studies (primary, secondary, upper  
35  
36 606 secondary, bachelor`s degree, postgraduate), hospital  
37  
38 607 service to which they belong and the number of hours  
39  
40 608 worked per week.  
41

42  
43  
44 609 ► Personal history: alcohol intake (yes/no; how many glasses  
45  
46 610 of beer or alcoholic beverages do you consume per week),  
47  
48 611 smoking habit (yes/ no; and number of cigarettes per day),  
49  
50 612 drug use (yes/no), diet per week (dietary restrictions  
51  
52 613 and number of meals per day) and number of hours of sleep  
53  
54 614 per day.  
55  
56  
57  
58  
59  
60

- 1  
2  
3 615 ▶ Gynaecological history (in women): Number of pregnancies,  
4  
5 616 number of live children, menarche, menopause.  
6  
7  
8 617 ▶ History of respiratory disease, history of  
9  
10 618 gastrointestinal disease, nephrological, neurological,  
11  
12 619 haematological, cardiovascular, allergies.  
13  
14  
15 620 ▶ Genetic family history, such as hypertension, diabetes,  
16  
17 621 heart disease, kidney disease.  
18  
19 622 ▶ Physical examination: blood pressure, heart rate,  
20  
21 623 respiratory rate, temperature, weight, height, body mass  
22  
23 624 index, skin lesions, head and neck inspection, respiratory  
24  
25 625 inspection (chest symmetry, lung expansion, palpation of  
26  
27 626 the bases and preserved vertices, lung percussion,  
28  
29 627 auscultation for lung murmur, breath sounds).  
30  
31  
32 628 Cardiovascular inspection (palpation of the fifth  
33  
34 629 intercostal space, auscultation of heart sounds, pulses  
35  
36 630 that are palpable and symmetrical), abdominal inspection  
37  
38 631 (palpation, percussion and auscultation of peristaltic  
39  
40 632 sounds), neurological evaluation (Glasgow, active  
41  
42 633 motility, passive motility, reflex motility, cranial  
43  
44 634 nerves, sensitivity).  
45  
46  
47  
48 635 ▶ Hematic biometry: haematocrit, leukocytes, segmented (%),  
49  
50 636 lymphocytes (%), monocytes (%), mean corpuscular volume,  
51  
52 637 platelets.  
53  
54  
55  
56  
57  
58  
59  
60

- 1  
2  
3 638 ▶ Blood chemistry: glycaemia, urea, creatinine, sodium,  
4  
5 639 potassium, chlorine, aspartate transaminase, alanine  
6  
7 640 transaminase, alkaline phosphatase, total bilirubin.  
8  
9  
10 641 ▶ Muscle enzymes.  
11  
12 642 ▶ Clotting times: thrombin time, prothrombin time,  
13  
14 643 international normalized ratio.  
15  
16  
17 644 ▶ Electrocardiogram: rhythm, heart rate, heart axis,  
18  
19 645 evaluation of P wave, PR interval, duration of QRS, QT  
20  
21 646 interval, time of T wave. The electrocardiogram will be  
22  
23 647 performed using an instrument calibrated and validated  
24  
25 648 for its use internationally, weekly.  
26  
27  
28 649  
29  
30  
31 650 ▶ Molecular test results for IgG and IgM antibodies:  
32  
33 651  
34 652 ○ The FDA approved product called Cellex qSARS-CoV-2  
35  
36 653 IgG/IgM Rapid Test will be used for serological  
37  
38 654 determination. The device cassette, sample, and  
39  
40 655 buffer solution must be at room temperature. The  
41  
42 656 sample (10 µL) is transferred to the center of the  
43  
44 657 sample well. After the sample well is free of liquid,  
45  
46 658 two drops of sample diluent are added. After fifteen  
47  
48 659 to twenty minutes, read the test results. Results  
49  
50 660 should not be read after twenty minutes.  
51  
52  
53  
54  
55  
56  
57  
58  
59  
60

- 1  
2  
3 661           o A positive IgM result occurs when a coloured band  
4  
5 662           appears on the M test line (M) and the control line  
6  
7 663           (C) and indicates that IgM against SARS-CoV-2 is  
8  
9  
10 664           present.
- 11  
12 665           o A positive IgG result occurs when a coloured band  
13  
14 666           appears on the G test line (G) and the control line  
15  
16 667           (C) and indicates that IgG against SARS-CoV-2 is  
17  
18 668           present.
- 19  
20  
21 669           o A positive result for IgM and IgG occurs when  
22  
23 670           coloured bands occur both M and G, as well as C.
- 24  
25 671           o A negative result occurs when a coloured band appears  
26  
27 672           in C only and indicates that IgM and IgG antibodies  
28  
29 673           against SARS-CoV-2 were not detected.
- 30  
31  
32 674           o An invalid result occurs when a colour band is not  
33  
34 675           produced in C, and the test must be repeated.

36  
37 676       ▶ Official qRT-PCR results (carried out by INCMNSZ)

38  
39 677

40  
41  
42 678 All this information will be collected in a pre-established  
43  
44 679 medical history questionnaire for each potential participant.

45  
46 680 The information obtained from the weekly assessment of adverse

47  
48 681 events, and the results of the qRT-PCR for SARS-CoV-2 at 60

49  
50 682 and 90 days (60 for the primary end point plus 30 more days of

51  
52 683 follow-up) after starting treatment will be entered into an

53  
54 684 online database. In order to ensure the quality of the data

1  
2  
3 685 collection, the database will be built in CASTOR, a database  
4  
5 686 on the Web that allows entering all the pre-defined data for  
6  
7 687 each participant, thus reducing human error. This information  
8  
9 688 will be stored on a server in the United States of America and  
10  
11 689 can only be accessed by the study's administrator. The data  
12  
13 690 may only be entered by a researcher in charge of collecting  
14  
15 691 the data sheets and emptying them.  
16  
17  
18  
19  
20

### 21 **Monitoring and quality assurance**

22  
23 694 Every possible adverse event will be noted daily by the  
24  
25 695 participants in the agenda that will be delivered to them. This  
26  
27 696 agenda will be evaluated weekly by the researcher in charge of  
28  
29 697 monitoring the participants (who will be blinded to group  
30  
31 698 assignment). In case of unbearable adverse events for the  
32  
33 699 participants or that put their health at risk, an open line  
34  
35 700 will be available 24 hours a day with direct communication to  
36  
37 701 the researcher in charge of monitoring the study to report any  
38  
39 702 event that requires hospitalization or immediate evaluation at  
40  
41 703 the hospital. All participants with adverse events that put  
42  
43 704 their life or health at risk may be urgently assessed by  
44  
45 705 personnel from both INCMNSZ and INR-LGII, if possible, by the  
46  
47 706 staff involved into the study. Patient follow-up investigator  
48  
49 707 will immediately contact the study administrator to disclose  
50  
51 708 the participant's assignment to treating physicians at that  
52  
53  
54  
55  
56  
57  
58  
59  
60

1  
2  
3 709 institution, but the assignment will never be disclosed to  
4  
5 710 other investigators related to the study. All the study  
6  
7 711 expenses and/or attention of collateral effects will be covered  
8  
9 712 by the current cost of the financing SECTEI/061/2020.  
10  
11  
12 713 Auditing will be carried out weekly, assessing adverse events,  
13  
14 714 capturing data in the corresponding datasheets by the study  
15  
16 715 administrator. Likewise, the data entered in the CASTOR web  
17  
18 716 base will be valued to validate its quality. The paper data  
19  
20 717 sheets must be kept in a special office dedicated to the study  
21  
22 718 in folders separated by volunteers with the informed consent  
23  
24 719 of each participant, the data of the medical history,  
25  
26 720 laboratory results, eligibility criteria, adverse event sheet  
27  
28 721 and results, molecular tests, as well as electrocardiogram.  
29  
30  
31 722 The letter of revocation of informed consent will also be  
32  
33 723 protected if required. As part of the audit, an interim  
34  
35 724 analysis will be carried out 30 days after the study starts to  
36  
37 725 assess the possible adverse effects and whether these outweigh  
38  
39 726 the potential benefits of the intervention. In the adverse  
40  
41 727 event outweigh the potential benefits, termination of the study  
42  
43 728 will be assessed. The approval of the research ethics committee  
44  
45 729 of the INR-LGII of Mexico has been obtained.  
46  
47  
48  
49  
50

51 730

52  
53 **731 Statistical analysis**  
54  
55  
56  
57  
58  
59  
60



1  
2  
3 732 Data analysis will be carried out by intention to treat, which  
4  
5 733 means that each participant will be analysed according to the  
6  
7 734 group assigned regardless of whether they modified their  
8  
9 735 treatment. The study variables will be divided according to  
10  
11 736 the allocation group. The statistical analysis will be carried  
12  
13 737 out by evaluation the difference between the different groups  
14  
15 738 of HCQ plus BHH versus placebos. Missing data will be handled  
16  
17 739 by multiple imputation analysis when missing at random. Deaths  
18  
19 740 will be censored.  
20  
21  
22

23 741

24  
25 742 The primary objective will be expressed in number and  
26  
27 743 proportion for each group. The RR will be obtained as the  
28  
29 744 division between the proportion of primary outcomes in the  
30  
31 745 intervention group(s) by the proportion of primary outcomes in  
32  
33 746 the double placebo group. Adjusted risk ratios (aRR) will be  
34  
35 747 obtained using a log-binomial regression, adjusting for age  
36  
37 748 and gender as pre-specified confounding variables. It will be  
38  
39 749 expressed as RR with its respective 95% confidence interval  
40  
41 750 for the initial time, which is 60 days. Likewise, the result  
42  
43 751 will be expressed as absolute risk, which will be derived from  
44  
45 752 the proportion of the primary outcome in the intervention group  
46  
47 753 minus the proportion of the primary outcome in the control  
48  
49 754 group. Secondly, the primary objective will be analysed with  
50  
51 755 the non-parametric estimate of the survival and risk function  
52  
53  
54  
55  
56  
57  
58  
59  
60

1  
2  
3 756 using Kaplan-Meier curves for 60 days according to the  
4  
5 757 allocation group. The primary endpoint will be SARS-CoV-2  
6  
7 758 infection within the 60-day period, and the silencing variable  
8  
9 759 will be dropping out of the study for any reason. The comparison  
10  
11 760 of the survival curves between both groups will be carried out  
12  
13 761 using the log-rank test. To adjust the primary objective to  
14  
15 762 possible confounders such as age, gender, service in which the  
16  
17 763 participant works, body mass index, etc. Multiple regression  
18  
19 764 will be performed using the Cox model to determine the adjusted  
20  
21 765 primary endpoint hazard ratio.  
22  
23  
24

25  
26 766

27  
28 767 For secondary outcomes such as the analysis at 90 days, the  
29  
30 768 same statistical analysis expressed in RR and absolute risk  
31  
32 769 will be used. Survival analysis will be used for the primary  
33  
34 770 endpoint only. An interim statistical analysis will be  
35  
36 771 performed 30 days after the study starts to assess possible  
37  
38 772 adverse effects and the efficacy of the intervention. The study  
39  
40 773 administrator will be the only one with access to the data.  
41  
42 774 For the interim analysis and the final analysis, the  
43  
44 775 administrator will export the data to Excel format to be  
45  
46 776 analysed by the study statistician blinded to the assignment  
47  
48 777 of groups, participants, or results.  
49  
50  
51

52  
53 778  
54  
55  
56  
57  
58  
59  
60

1  
2  
3 779 **Adverse events, serious adverse events and suspected unexpected**  
4  
5 780 **serious adverse reactions**  
6

7 781 By requiring the use of drugs, the participant will be exposed  
8  
9 782 to risks inherent to the drug used, ranging from mild to severe  
10  
11 783 or death. Any unexpected risks that may occur during the study  
12  
13 784 will be immediately explained to the participants and the  
14  
15 785 ethics committee. Any adverse event will be compiled and will  
16  
17 786 not be disclosed under any condition to anyone other than the  
18  
19 787 study administrator, treating physicians in case of severe  
20  
21 788 events, and the ethics committee. The results will be  
22  
23 789 completely anonymous concerning the names of the participants.  
24  
25 790 The results will be compiled and reported as combined  
26  
27 791 collective data.  
28  
29  
30  
31

32 792

33  
34 793 *Patient and public involvement*  
35

36 794 Patients were not involved in the development of this research.  
37  
38 795 However, the results of the study will be communicated to the  
39  
40 796 study participants by sending the end product (published  
41  
42 797 article) to the provided email address.  
43  
44  
45

46 798

47  
48 799 **ETHICS, DISSEMINATION AND SAFETY MONITORING**  
49

50 800 In case of adverse events or complications derived from the  
51  
52 801 study, participants will be assured attention by the staff of  
53  
54 802 the INCMNSZ in an enclosure that ensures the safety of the  
55  
56  
57  
58  
59  
60

1  
2  
3 803 participant, not subjecting volunteers to a higher risk of  
4  
5 804 contamination. This care will be extended until adverse events  
6  
7 805 are resolved. In case of no adverse events during the study,  
8  
9 806 medical attention will be extended at the aforementioned  
10  
11 807 institute until 15 days after the end of the study.  
12  
13

14 808

15  
16 809 This protocol has been approved by the local medical ethical  
17  
18 810 review committee at the INR-LGII with the internal number  
19  
20 811 INRLGII/25/20, and by the Federal Commission for Protection  
21  
22 812 against Sanitary Risks (in Spanish, Comisión Federal para la  
23  
24 813 Protección contra Riesgos Sanitarios, COFEPRIS), approval  
25  
26 814 number 203300410A0058/2020.  
27

28  
29 815 The study results will be published in journals of worldwide  
30  
31 816 impact affiliated with the Journal Citation Reports. Likewise,  
32  
33 817 the results of the study will be disseminated in national and  
34  
35 818 international media, exposed in international and national  
36  
37 819 congresses, communicated to CONACYT, and recorded in  
38  
39 820 Clinicaltrials.gov according to the study identifier number.  
40  
41

42  
43 821 The help of non-profit organizations will be sought to  
44  
45 822 disseminate the results of the investigation to interest  
46  
47 823 groups.  
48

49 824

50  
51 825 The complete protocol will be published on Clinicaltrials.gov  
52  
53 826 and the OSF - Center for Open Science platform <https://osf.io/>.  
54  
55  
56  
57  
58  
59  
60

1  
2  
3 827 Where a DOI will be assigned, and the amendments made to the  
4  
5 828 original protocol will be assessed.  
6  
7

8 829

9  
10 830 Amendments to the protocol may be made before the start of the  
11  
12 831 study and during the study. Any amendment to the protocol will  
13  
14 832 be clarified and posted on Clinicaltrials.gov under the same  
15  
16 833 identifier as this study. Likewise, any amendment will be sent  
17  
18 834 to the ethics committee of the same hospital.  
19

20  
21 835

#### 22 23 836 **AUTHOR CONTRIBUTIONS**

24  
25 837 JGM is the lead study investigator, developed the study  
26  
27 838 concepts and design, and wrote the manuscript by adapting the  
28  
29 839 original study protocol for publication, subsequent reviews  
30  
31 840 and amendments. EJHL, KMM and AAA contributed to the  
32  
33 841 development and refining of the protocol, writing of manuscript  
34  
35 842 and subsequent review. RJMP provided advanced methodological  
36  
37 843 and statistical input, and contributed to the study design and  
38  
39 844 subsequent amendments. RFC, TCH, PSSB, RAG and NML reviewed,  
40  
41 845 commented and informed methodology, development and writing of  
42  
43 846 the protocol.  
44  
45

46  
47 847

#### 48 49 848 **FUNDING STATEMENT**

50  
51 849 This work was supported by the Mexican Education, Science,  
52  
53 850 Technology and Innovation Department (in Spanish, Secretaría  
54  
55  
56  
57  
58  
59  
60

1  
2  
3 851 de Educación, Ciencia, Tecnología e Innovación), grant number  
4  
5 852 SECTEI/061/20.  
6

7  
8 853  
9

10 854 **COMPETING INTERESTS STATEMENT**

11  
12 855 None of the authors have conflict of interests, commercial  
13  
14 856 agreements, or receive financial fees or compensation from any  
15  
16 857 commercial or pharmaceutical company.  
17

18  
19 858  
20

21 859 **ETHICS APPROVAL**

22  
23 860 This protocol has been approved by the local medical ethical  
24  
25 861 review committee at the INR-LGII with the internal number  
26  
27 862 INRLGII/25/20. Definitions of Research Risk Regulation of the  
28  
29 863 General Health Law on Research for Health (in Spanish,  
30  
31 864 Reglamento de la Ley General de Salud en Materia de  
32  
33 865 Investigación para la Salud)  
34  
35 866 <http://www.inr.gob.mx/Descargas/Investigacion/Reglamentos->  
36  
37 867 [LGS-Materia-Investigacion-Salud.pdf](http://www.inr.gob.mx/Descargas/Investigacion/Reglamentos-LGS-Materia-Investigacion-Salud.pdf). ARTICLE 17; and by  
38  
39 868 Federal Commission for Protection against Sanitary Risks (in  
40  
41 869 Spanish, Comisión Federal para la Protección contra Riesgos  
42  
43 870 Sanitarios, COFEPRIS), approval number 203300410A0058/2020.  
44  
45  
46  
47

48 871  
49

50 872  
51

52  
53 873 **PROVENANCE AND PEER REVIEW**

54  
55 874 Not commissioned; externally peer reviewed.  
56  
57  
58  
59  
60

1  
2  
3 875  
4

5 876 **ORCID ID**  
6

7 877 Julio Granados-Montiel <https://orcid.org/0000-0002-0611-64>  
8  
9

10 878  
11

12 879  
13

14 880  
15

16 881  
17

18 882  
19

20 883  
21

22 884  
23

24 885  
25

26 886  
27

28 887  
29

30 888  
31

32 889  
33

34 890  
35

36 891  
37

38 892  
39

40 893  
41

42 894  
43

44 895  
45

46 896 **REFERENCES**  
47

48 897 1 [Internet]. C.DM. COVID-19 Dashboard México. 2021 [cited  
49

50 898 2021 21/01/2021].  
51  
52

- 1  
2  
3 899 2 Pal M, Berhanu G, Desalegn C, *et al.* Severe Acute  
4  
5 900 Respiratory Syndrome Coronavirus-2 (SARS-CoV-2): An  
6  
7 901 Update. *Cureus* Published Online First: 2020.  
8  
9 902 doi:10.7759/cureus.7423  
10  
11  
12 903 3 Lai C, Yu R, Wang M, *et al.* Shorter incubation period is  
13  
14 904 associated with severe disease progression in patients  
15  
16 905 with COVID-19. *Virulence* Published Online First: 2020.  
17  
18 906 doi:10.1080/21505594.2020.1836894  
19  
20  
21 907 4 Guan W, Ni Z, Hu Y, *et al.* Clinical Characteristics of  
22  
23 908 Coronavirus Disease 2019 in China. *N Engl J Med*  
24  
25 909 Published Online First: 2020. doi:10.1056/nejmoa2002032  
26  
27  
28 910 5 Li C, Ji F, Wang L, *et al.* Asymptomatic and Human-to-  
29  
30 911 Human Transmission of SARS-CoV-2 in a 2-Family Cluster,  
31  
32 912 Xuzhou, China. *Emerg Infect Dis* Published Online First:  
33  
34 913 2020. doi:10.3201/eid2607.200718  
35  
36  
37 914 6 Xu H, Zhong L, Deng J, *et al.* High expression of ACE2  
38  
39 915 receptor of 2019-nCoV on the epithelial cells of oral  
40  
41 916 mucosa. *Int J Oral Sci* Published Online First: 2020.  
42  
43 917 doi:10.1038/s41368-020-0074-x  
44  
45  
46 918 7 Levy A, Yagil Y, Bursztyn M, *et al.* ACE2 expression and  
47  
48 919 activity are enhanced during pregnancy. *Am J Physiol -*  
49  
50 920 *Regul Integr Comp Physiol* Published Online First: 2008.  
51  
52 921 doi:10.1152/ajpregu.90592.2008  
53  
54  
55 922 8 Baig AM, Khaleeq A, Ali U, *et al.* Evidence of the COVID-



- 1  
2  
3 923 19 Virus Targeting the CNS: Tissue Distribution, Host-  
4  
5 924 Virus Interaction, and Proposed Neurotropic Mechanisms.  
6  
7 925 ACS Chem. Neurosci. 2020.  
8  
9 926 doi:10.1021/acschemneuro.0c00122  
10  
11  
12 927 9 Zhan M, Qin Y, Xue X, et al. Death from Covid-19 of 23  
13  
14 928 Health Care Workers in China. *N Engl J Med* Published  
15  
16 929 Online First: 2020. doi:10.1056/nejmc2005696  
17  
18  
19 930 10 Wu Z, McGoogan JM. Characteristics of and Important  
20  
21 931 Lessons From the Coronavirus Disease 2019 (COVID-19)  
22  
23 932 Outbreak in China. *JAMA* Published Online First: 2020.  
24  
25 933 doi:10.1001/jama.2020.2648  
26  
27  
28 934 11 Remuzzi A, Remuzzi G. COVID-19 and Italy: what next?  
29  
30 935 *Lancet*. 2020. doi:10.1016/S0140-6736(20)30627-9  
31  
32 936 12 Luzzi GA, Peto TEA. Adverse Effects of Antimalarials: An  
33  
34 937 Update. *Drug Saf*. 1993. doi:10.2165/00002018-199308040-  
35  
36 938 00004  
37  
38  
39 939 13 Liu Q, Bi G, Chen G, et al. Time-Dependent Distribution  
40  
41 940 of Hydroxychloroquine in Cynomolgus Macaques Using  
42  
43 941 Population Pharmacokinetic Modeling Method. *Front*  
44  
45 942 *Pharmacol* Published Online First: 2021.  
46  
47 943 doi:10.3389/fphar.2020.602880  
48  
49  
50 944 14 Wang LF, Lin YS, Huang NC, et al. Hydroxychloroquine-  
51  
52 945 inhibited dengue virus is associated with host defense  
53  
54 946 machinery. *J Interf Cytokine Res* 2015;**35**:143-56.

- 1  
2  
3 947 doi:10.1089/jir.2014.0038  
4  
5 948 15 Gouda Kamel Helal, Magdy Abdelmawgoud Gad, Mohamed Fahmy  
6  
7 949 Abd-Ellah and MSE. Hydroxychloroquine Augments Early  
8  
9 950 Virological Response to Pegylated Interferon Plus  
10  
11 951 Ribavirin in Genotype-4 Chronic Hepatitis C Patients.  
12  
13 952 *Antivir Ther* 2006;**55**:52-5. doi:10.1002/jmv  
14  
15 953 16 Wang M, Cao R, Zhang L, et al. Remdesivir and  
16  
17 954 chloroquine effectively inhibit the recently emerged  
18  
19 955 novel coronavirus (2019-nCoV) in vitro. *Cell Res*. 2020.  
20  
21 956 doi:10.1038/s41422-020-0282-0  
22  
23 957 17 Gao J, Tian Z, Yang X. Breakthrough: Chloroquine  
24  
25 958 phosphate has shown apparent efficacy in treatment of  
26  
27 959 COVID-19 associated pneumonia in clinical studies.  
28  
29 960 *Biosci. Trends*. 2020. doi:10.5582/BST.2020.01047  
30  
31 961 18 Yao X, Ye F, Zhang M, et al. In Vitro Antiviral Activity  
32  
33 962 and Projection of Optimized Dosing Design of  
34  
35 963 Hydroxychloroquine for the Treatment of Severe Acute  
36  
37 964 Respiratory Syndrome Coronavirus 2 (SARS-CoV-2). *Clin*  
38  
39 965 *Infect Dis* Published Online First: 2020.  
40  
41 966 doi:10.1093/cid/ciaa237  
42  
43 967 19 Dutta D, Sharma M, Sharma R. Short-term  
44  
45 968 hydroxychloroquine in COVID-19 infection in people with  
46  
47 969 or without metabolic syndrome - clearing safety issues  
48  
49 970 and good clinical practice. *Eur. Endocrinol*. 2020.  
50  
51  
52  
53  
54  
55  
56  
57  
58  
59  
60

- 1  
2  
3 971 doi:10.17925/ee.2020.16.2.109  
4  
5 972 20 Han H, Ma Q, Li C, et al. Profiling serum cytokines in  
6  
7 973 COVID-19 patients reveals IL-6 and IL-10 are disease  
8  
9 974 severity predictors. *Emerg Microbes Infect* Published  
10  
11 975 Online First: 2020. doi:10.1080/22221751.2020.1770129  
12  
13  
14 976 21 Paiardini M, Müller-Trutwin M. HIV-associated chronic  
15  
16 977 immune activation. *Immunol Rev* Published Online First:  
17  
18 978 2013. doi:10.1111/imr.12079  
19  
20  
21 979 22 Chude CI, Amaravadi RK. Targeting autophagy in cancer:  
22  
23 980 Update on clinical trials and novel inhibitors. *Int. J.*  
24  
25 981 *Mol. Sci.* 2017. doi:10.3390/ijms18061279  
26  
27  
28 982 23 Geleris J, Sun Y, Platt J, et al. Observational Study of  
29  
30 983 Hydroxychloroquine in Hospitalized Patients with Covid-  
31  
32 984 19. *N Engl J Med* 2020;**382**:2411-8.  
33  
34 985 doi:10.1056/nejmoa2012410  
35  
36  
37 986 24 Zahr N, Urien S, Llopis B, et al. Pharmacokinetics and  
38  
39 987 pharmacodynamics of hydroxychloroquine in hospitalized  
40  
41 988 patients with COVID-19. *Therapies* Published Online  
42  
43 989 First: 2021. doi:10.1016/j.therap.2021.01.056  
44  
45  
46 990 25 Chang R, Sun WZ. Repositioning chloroquine as antiviral  
47  
48 991 prophylaxis against COVID-19: potential and challenges.  
49  
50 992 *Drug Discov Today* 2020;**25**:1786-92.  
51  
52 993 doi:10.1016/j.drudis.2020.06.030  
53  
54  
55 994 26 Juurlink DN. Safety considerations with chloroquine,  
56  
57  
58  
59  
60

- 1  
2  
3 995 hydroxychloroquine and azithromycin in the management of  
4  
5 996 SARS-CoV-2 infection. *CMAJ*. 2020.  
6  
7 997 doi:10.1503/cmaj.200528  
8  
9  
10 998 27 Zanasi A, Mazzolini M, Kantar A. A reappraisal of the  
11  
12 999 mucoactive activity and clinical efficacy of bromhexine.  
13  
14 1000 *Multidiscip. Respir. Med.* 2017. doi:10.1186/s40248-017-  
15  
16 1001 0088-1  
17  
18  
19 1002 28 Depfenhart M, de Villiers D, Lemperle G, *et al.*  
20  
21 1003 Potential new treatment strategies for COVID-19: is  
22  
23 1004 there a role for bromhexine as add-on therapy? *Intern.*  
24  
25 1005 *Emerg. Med.* 2020. doi:10.1007/s11739-020-02383-3  
26  
27  
28 1006 29 Hoffmann M, Kleine-Weber H, Schroeder S, *et al.* SARS-  
29  
30 1007 CoV-2 Cell Entry Depends on ACE2 and TMPRSS2 and Is  
31  
32 1008 Blocked by a Clinically Proven Protease Inhibitor. *Cell*  
33  
34 1009 Published Online First: 2020.  
35  
36 1010 doi:10.1016/j.cell.2020.02.052  
37  
38  
39 1011 30 Mareev VY, Orlova YA, Pavlikova EP, *et al.* Combination  
40  
41 1012 therapy at an early stage of the novel coronavirus  
42  
43 1013 infection (COVID-19). Case series and design of the  
44  
45 1014 clinical trial 'Bromhexine and Spironolactone for  
46  
47 1015 Coronavirus Infection requiring hospitalization  
48  
49 1016 (BISCUIT)'. *Kardiologiya* Published Online First: 2020.  
50  
51 1017 doi:10.18087/cardio.2020.8.n1307  
52  
53  
54  
55 1018  
56  
57  
58  
59  
60

1019

For peer review only

1  
2  
3  
4  
5  
6  
7  
8  
9  
10  
11  
12  
13  
14  
15  
16  
17  
18  
19  
20  
21  
22  
23  
24  
25  
26  
27  
28  
29  
30  
31  
32  
33  
34  
35  
36  
37  
38  
39  
40  
41  
42  
43  
44  
45  
46  
47  
48  
49  
50  
51  
52  
53  
54  
55  
56  
57  
58  
59  
60

SPIRIT 2013 Checklist: Recommended items to address in a clinical trial protocol and related documents\*

| Section/item                      | ItemNo | Description                                                                                                                                                                                                                                                                              | Page/Line            |
|-----------------------------------|--------|------------------------------------------------------------------------------------------------------------------------------------------------------------------------------------------------------------------------------------------------------------------------------------------|----------------------|
| <b>Administrative information</b> |        |                                                                                                                                                                                                                                                                                          |                      |
| Title                             | 1      | Descriptive title identifying the study design, population, interventions, and, if applicable, trial acronym                                                                                                                                                                             | 1/1-3                |
| Trial registration                | 2a     | Trial identifier and registry name. If not yet registered, name of intended registry                                                                                                                                                                                                     | 4/72                 |
|                                   | 2b     | All items from the World Health Organization Trial Registration Data Set                                                                                                                                                                                                                 | NA                   |
| Protocol version                  | 3      | Date and version identifier                                                                                                                                                                                                                                                              | 4/74                 |
| Funding                           | 4      | Sources and types of financial, material, and other support                                                                                                                                                                                                                              | 32/623625            |
| Roles and responsibilities        | 5a     | Names, affiliations, and roles of protocol contributors                                                                                                                                                                                                                                  | 1/5-17<br>31/614-620 |
|                                   | 5b     | Name and contact information for the trial sponsor                                                                                                                                                                                                                                       | 1/19-23              |
|                                   | 5c     | Role of study sponsor and funders, if any, in study design; collection, management, analysis, and interpretation of data; writing of the report; and the decision to submit the report for publication, including whether they will have ultimate authority over any of these activities | 31/614-620           |
|                                   | 5d     | Composition, roles, and responsibilities of the coordinating centre, steering committee, endpoint adjudication committee, data management team, and other individuals or groups overseeing the trial, if applicable (see Item 21a for data monitoring committee)                         | NA                   |
| <b>Introduction</b>               |        |                                                                                                                                                                                                                                                                                          |                      |
| Background and rationale          | 6a     | Description of research question and justification for undertaking the trial, including summary of relevant studies (published and unpublished) examining benefits and harms for each intervention                                                                                       | 5-8/94-179           |
|                                   | 6b     | Explanation for choice of comparators                                                                                                                                                                                                                                                    | 8/170-179            |
| Objectives                        | 7      | Specific objectives or hypotheses                                                                                                                                                                                                                                                        | 8/170-179            |
| Trial design                      | 8      | Description of trial design including type of trial (eg, parallel group, crossover, factorial, single group), allocation ratio, and framework (eg, superiority, equivalence, noninferiority, exploratory)                                                                                | 9/187-189            |

|                                                                       |     |                                                                                                                                                                                                                                                                                                                                                                                |                   |
|-----------------------------------------------------------------------|-----|--------------------------------------------------------------------------------------------------------------------------------------------------------------------------------------------------------------------------------------------------------------------------------------------------------------------------------------------------------------------------------|-------------------|
| <b>Methods:<br/>Participants,<br/>interventions,<br/>and outcomes</b> |     |                                                                                                                                                                                                                                                                                                                                                                                |                   |
| Study setting                                                         | 9   | Description of study settings (eg, community clinic, academic hospital) and list of countries where data will be collected. Reference to where list of study sites can be obtained                                                                                                                                                                                             | 9/187-202         |
| Eligibility criteria                                                  | 10  | Inclusion and exclusion criteria for participants. If applicable, eligibility criteria for study centres and individuals who will perform the interventions (eg, surgeons, psychotherapists)                                                                                                                                                                                   | 9-11/203-244      |
| Interventions                                                         | 11a | Interventions for each group with sufficient detail to allow replication, including how and when they will be administered                                                                                                                                                                                                                                                     | 16/261-284        |
|                                                                       | 11b | Criteria for discontinuing or modifying allocated interventions for a given trial participant (eg, drug dose change in response to harms, participant request, or improving/worsening disease)                                                                                                                                                                                 | 17/277-279        |
|                                                                       | 11c | Strategies to improve adherence to intervention protocols, and any procedures for monitoring adherence (eg, drug tablet return, laboratory tests)                                                                                                                                                                                                                              | 16/265-268        |
|                                                                       | 11d | Relevant concomitant care and interventions that are permitted or prohibited during the trial                                                                                                                                                                                                                                                                                  | NA                |
| Outcomes                                                              | 12  | Primary, secondary, and other outcomes, including the specific measurement variable (eg, systolic blood pressure), analysis metric (eg, change from baseline, final value, time to event), method of aggregation (eg, median, proportion), and time point for each outcome. Explanation of the clinical relevance of chosen efficacy and harm outcomes is strongly recommended | 21-23<br>/383-430 |
| Participant timeline                                                  | 13  | Time schedule of enrolment, interventions (including any run-ins and washouts), assessments, and visits for participants. A schematic diagram is highly recommended (see Figure)                                                                                                                                                                                               | 19-21/340-380     |
| Sample size                                                           | 14  | Estimated number of participants needed to achieve study objectives and how it was determined, including clinical and statistical assumptions supporting any sample size calculations                                                                                                                                                                                          | 15/249-258        |
| Recruitment                                                           | 15  | Strategies for achieving adequate participant enrolment to reach target sample size                                                                                                                                                                                                                                                                                            | 10/208-244        |

|                                                                                     |     |                                                                                                                                                                                                                                                                                                                                                                                                              |            |
|-------------------------------------------------------------------------------------|-----|--------------------------------------------------------------------------------------------------------------------------------------------------------------------------------------------------------------------------------------------------------------------------------------------------------------------------------------------------------------------------------------------------------------|------------|
| <b>Methods:<br/>Assignment of<br/>interventions<br/>(for controlled<br/>trials)</b> |     |                                                                                                                                                                                                                                                                                                                                                                                                              |            |
| Allocation:                                                                         |     |                                                                                                                                                                                                                                                                                                                                                                                                              |            |
| Sequence generation                                                                 | 16a | Method of generating the allocation sequence (eg, computer-generated random numbers), and list of any factors for stratification. To reduce predictability of a random sequence, details of any planned restriction (eg, blocking) should be provided in a separate document that is unavailable to those who enrol participants or assign interventions                                                     | 17/287-290 |
| Allocation concealment mechanism                                                    | 16b | Mechanism of implementing the allocation sequence (eg, central telephone; sequentially numbered, opaque, sealed envelopes), describing any steps to conceal the sequence until interventions are assigned                                                                                                                                                                                                    | 17/290-294 |
| Implementation                                                                      | 16c | Who will generate the allocation sequence, who will enrol participants, and who will assign participants to interventions                                                                                                                                                                                                                                                                                    | 17/295-297 |
| Blinding (masking)                                                                  | 17a | Who will be blinded after assignment to interventions (eg, trial participants, care providers, outcome assessors, data analysts), and how                                                                                                                                                                                                                                                                    | 18/301-328 |
|                                                                                     | 17b | If blinded, circumstances under which unblinding is permissible, and procedure for revealing a participant's allocated intervention during the trial                                                                                                                                                                                                                                                         | NA         |
| <b>Methods: Data collection, management, and analysis</b>                           |     |                                                                                                                                                                                                                                                                                                                                                                                                              |            |
| Data collection methods                                                             | 18a | Plans for assessment and collection of outcome, baseline, and other trial data, including any related processes to promote data quality (eg, duplicate measurements, training of assessors) and a description of study instruments (eg, questionnaires, laboratory tests) along with their reliability and validity, if known. Reference to where data collection forms can be found, if not in the protocol | 26/499-508 |
|                                                                                     | 18b | Plans to promote participant retention and complete follow-up, including list of any outcome data to be collected for participants                                                                                                                                                                                                                                                                           | NA         |



|                                 |     |                                                                                                                                                                                                                                                                                                                                       |               |
|---------------------------------|-----|---------------------------------------------------------------------------------------------------------------------------------------------------------------------------------------------------------------------------------------------------------------------------------------------------------------------------------------|---------------|
|                                 |     | who discontinue or deviate from intervention protocols                                                                                                                                                                                                                                                                                |               |
| Data management                 | 19  | Plans for data entry, coding, security, and storage, including any related processes to promote data quality (eg, double data entry; range checks for data values). Reference to where details of data management procedures can be found, if not in the protocol                                                                     | 26/500-505    |
| Statistical methods             | 20a | Statistical methods for analyzing primary and secondary outcomes. Reference to where other details of the statistical analysis plan can be found, if not in the protocol                                                                                                                                                              | 28/539-542    |
|                                 | 20b | Methods for any additional analyses (eg, subgroup and adjusted analyses)                                                                                                                                                                                                                                                              | 28/552-554    |
|                                 | 20c | Definition of analysis population relating to protocol non-adherence (eg, as randomized analysis), and any statistical methods to handle missing data (eg, multiple imputation)                                                                                                                                                       | 28/541-542    |
| <b>Methods: Monitoring</b>      |     |                                                                                                                                                                                                                                                                                                                                       |               |
| Data monitoring                 | 21a | Composition of data monitoring committee (DMC); summary of its role and reporting structure; statement of whether it is independent from the sponsor and competing interests; and reference to where further details about its charter can be found, if not in the protocol. Alternatively, an explanation of why a DMC is not needed | NA            |
|                                 | 21b | Description of any interim analyses and stopping guidelines, including who will have access to these interim results and make the final decision to terminate the trial                                                                                                                                                               | 29/563-567    |
| Harms                           | 22  | Plans for collecting, assessing, reporting, and managing solicited and spontaneously reported adverse events and other unintended effects of trial interventions or trial conduct                                                                                                                                                     | 29/571-576    |
| Auditing                        | 23  | Frequency and procedures for auditing trial conduct, if any, and whether the process will be independent from investigators and the sponsor                                                                                                                                                                                           | 27-28/524-534 |
| <b>Ethics and dissemination</b> |     |                                                                                                                                                                                                                                                                                                                                       |               |
| Research ethics approval        | 24  | Plans for seeking research ethics committee/institutional review board (REC/IRB) approval                                                                                                                                                                                                                                             | 30/585-595    |
| Protocol amendments             | 25  | Plans for communicating important protocol modifications (eg, changes to eligibility criteria, outcomes, analyses) to relevant                                                                                                                                                                                                        | 31/596-601    |

|                          |     |                                                                                                                                                                                      |            |
|--------------------------|-----|--------------------------------------------------------------------------------------------------------------------------------------------------------------------------------------|------------|
|                          |     | parties (eg, investigators, REC/IRBs, trial participants, trial registries, journals, regulators)                                                                                    |            |
| Consent or assent        | 26a | Who will obtain informed consent or assent from potential trial participants or authorised surrogates, and how (see Item 32)                                                         | 18/313-316 |
|                          | 26b | Additional consent provisions for collection and use of participant data and biological specimens in ancillary studies, if applicable                                                | NA         |
| Confidentiality          | 27  | How personal information about potential and enrolled participants will be collected, shared, and maintained in order to protect confidentiality before, during, and after the trial | 19/323-328 |
| Declaration of interests | 28  | Financial and other competing interests for principal investigators for the overall trial and each study site                                                                        | 32/627-628 |
| Access to data           | 29  | Statement of who will have access to the final trial dataset, and disclosure of contractual agreements that limit such access for investigators                                      | 18/307-311 |

# BMJ Open

## New prophylaxis regimen for SARS-CoV-2 infection in health professionals with low doses of Hydroxychloroquine and Bromhexine. A randomized, double-blind placebo clinical trial (ELEVATE Trial).

|                                 |                                                                                                                                                                                                                                                                                                                                                                                                                                                                                                                                                                                                                                                                                                                                                                                                                                                                                                                                                                                                                                                                                                                                                                                                                                                                                                                                                                                                          |
|---------------------------------|----------------------------------------------------------------------------------------------------------------------------------------------------------------------------------------------------------------------------------------------------------------------------------------------------------------------------------------------------------------------------------------------------------------------------------------------------------------------------------------------------------------------------------------------------------------------------------------------------------------------------------------------------------------------------------------------------------------------------------------------------------------------------------------------------------------------------------------------------------------------------------------------------------------------------------------------------------------------------------------------------------------------------------------------------------------------------------------------------------------------------------------------------------------------------------------------------------------------------------------------------------------------------------------------------------------------------------------------------------------------------------------------------------|
| Journal:                        | <i>BMJ Open</i>                                                                                                                                                                                                                                                                                                                                                                                                                                                                                                                                                                                                                                                                                                                                                                                                                                                                                                                                                                                                                                                                                                                                                                                                                                                                                                                                                                                          |
| Manuscript ID                   | bmjopen-2020-045190.R3                                                                                                                                                                                                                                                                                                                                                                                                                                                                                                                                                                                                                                                                                                                                                                                                                                                                                                                                                                                                                                                                                                                                                                                                                                                                                                                                                                                   |
| Article Type:                   | Protocol                                                                                                                                                                                                                                                                                                                                                                                                                                                                                                                                                                                                                                                                                                                                                                                                                                                                                                                                                                                                                                                                                                                                                                                                                                                                                                                                                                                                 |
| Date Submitted by the Author:   | 03-Apr-2021                                                                                                                                                                                                                                                                                                                                                                                                                                                                                                                                                                                                                                                                                                                                                                                                                                                                                                                                                                                                                                                                                                                                                                                                                                                                                                                                                                                              |
| Complete List of Authors:       | <p>GRANADOS-MONTIEL, JULIO; Instituto Nacional de Rehabilitacion Luis Guillermo Ibarra Ibarra, Tissue Engineering and Regenerative Medicine Unit</p> <p>Hazan-Lasri, Eric; Instituto Nacional de Rehabilitacion Luis Guillermo Ibarra Ibarra, Division of Traumatology, Emergencies and Bone Infections</p> <p>Franco-Cendejas, Rafael; Instituto Nacional de Rehabilitacion Luis Guillermo Ibarra Ibarra, Infectology Laboratory</p> <p>Chavez-Heres, Tatiana; Instituto Nacional de Rehabilitacion Luis Guillermo Ibarra Ibarra, Service, Hospital Epidemiological Surveillance Unit</p> <p>Silva-Bermudez, Phaedra; Instituto Nacional de Rehabilitacion Luis Guillermo Ibarra Ibarra, Tissue Engineering and Regenerative Medicine Unit</p> <p>Aguilar-Gaytan, Rocio; Instituto Nacional de Rehabilitacion Luis Guillermo Ibarra Ibarra, Tissue Engineering and Regenerative Medicine Unit</p> <p>Manzano-Leon, Natalia; Instituto Nacional de Cancerologia, Basic Division Research</p> <p>Méndez-Maldonado, Karla; Instituto Nacional de Rehabilitacion Luis Guillermo Ibarra Ibarra, Tissue Engineering and Regenerative Medicine Unit</p> <p>Alvarez-Arce, Alejandro; Instituto Nacional de Rehabilitación Luis Guillermo Ibarra Ibarra, Tissue Engineering and Regenerative Medicine Unit</p> <p>Martinez-Portilla, Raigam ; National Institute of Perinatology, Clinical research division</p> |
| <b>Primary Subject Heading</b>: | Health services research                                                                                                                                                                                                                                                                                                                                                                                                                                                                                                                                                                                                                                                                                                                                                                                                                                                                                                                                                                                                                                                                                                                                                                                                                                                                                                                                                                                 |
| Secondary Subject Heading:      | Evidence based practice, Global health, Medical publishing and peer review                                                                                                                                                                                                                                                                                                                                                                                                                                                                                                                                                                                                                                                                                                                                                                                                                                                                                                                                                                                                                                                                                                                                                                                                                                                                                                                               |
| Keywords:                       | INFECTIOUS DISEASES, PREVENTIVE MEDICINE, Clinical trials < THERAPEUTICS, COVID-19, CLINICAL PHARMACOLOGY                                                                                                                                                                                                                                                                                                                                                                                                                                                                                                                                                                                                                                                                                                                                                                                                                                                                                                                                                                                                                                                                                                                                                                                                                                                                                                |
|                                 |                                                                                                                                                                                                                                                                                                                                                                                                                                                                                                                                                                                                                                                                                                                                                                                                                                                                                                                                                                                                                                                                                                                                                                                                                                                                                                                                                                                                          |

1  
2  
3  
4  
5  
6  
7  
8  
9  
10  
11  
12  
13  
14  
15  
16  
17  
18  
19  
20  
21  
22  
23  
24  
25  
26  
27  
28  
29  
30  
31  
32  
33  
34  
35  
36  
37  
38  
39  
40  
41  
42  
43  
44  
45  
46  
47  
48  
49  
50  
51  
52  
53  
54  
55  
56  
57  
58  
59  
60





I, the Submitting Author has the right to grant and does grant on behalf of all authors of the Work (as defined in the below author licence), an exclusive licence and/or a non-exclusive licence for contributions from authors who are: i) UK Crown employees; ii) where BMJ has agreed a CC-BY licence shall apply, and/or iii) in accordance with the terms applicable for US Federal Government officers or employees acting as part of their official duties; on a worldwide, perpetual, irrevocable, royalty-free basis to BMJ Publishing Group Ltd ("BMJ") its licensees and where the relevant Journal is co-owned by BMJ to the co-owners of the Journal, to publish the Work in this journal and any other BMJ products and to exploit all rights, as set out in our [licence](#).

The Submitting Author accepts and understands that any supply made under these terms is made by BMJ to the Submitting Author unless you are acting as an employee on behalf of your employer or a postgraduate student of an affiliated institution which is paying any applicable article publishing charge ("APC") for Open Access articles. Where the Submitting Author wishes to make the Work available on an Open Access basis (and intends to pay the relevant APC), the terms of reuse of such Open Access shall be governed by a Creative Commons licence – details of these licences and which [Creative Commons](#) licence will apply to this Work are set out in our licence referred to above.

Other than as permitted in any relevant BMJ Author's Self Archiving Policies, I confirm this Work has not been accepted for publication elsewhere, is not being considered for publication elsewhere and does not duplicate material already published. I confirm all authors consent to publication of this Work and authorise the granting of this licence.

1  
2  
3 1 **New prophylaxis regimen for SARS-CoV-2 infection in health**  
4  
5 2 **professionals with low doses of Hydroxychloroquine and**  
6  
7 3 **Bromhexine: a randomized, double-blind placebo clinical trial**  
8  
9 4 **(ELEVATE Trial).**  
10  
11  
12 5

13  
14 6 Julio Granados-Montiel<sup>1\*</sup>, Eric Joseph Hazan Lasri<sup>2</sup>, Rafael  
15  
16 7 Franco Cendejas<sup>3</sup>, Tatiana Chávez Heres<sup>4</sup>, Phaedra Suriel Silva  
17  
18 8 Bermúdez<sup>1</sup>, Rocío Aguilar Gaytán<sup>1</sup>, Natalia Manzano-León<sup>5</sup>, Karla  
19  
20 9 Méndez-Maldonado<sup>1</sup>, Alejandro Alvarez-Arce<sup>1</sup>, Raigam J. Martinez-  
21  
22 10 Portilla<sup>6</sup>.  
23  
24  
25

26 11  
27  
28 12 <sup>1</sup> Tissue Engineering and Regenerative Medicine Unit. National  
29  
30 13 Institute of Rehabilitation. Mexico City, Mexico.

31  
32 14 <sup>2</sup> Division of Traumatology, Emergencies and Bone Infections.  
33  
34 15 National Institute of Rehabilitation. Mexico City, Mexico.

35  
36 16 <sup>3</sup> Infectology Laboratory. National Institute of Rehabilitation.  
37  
38 17 Mexico City, Mexico.

39  
40 18 <sup>4</sup> Service, Hospital Epidemiological Surveillance Unit. National  
41  
42 19 Institute of Rehabilitation. Mexico City, Mexico.

43  
44 20 <sup>5</sup> Basic Division Research, National Institute of Cancerology.  
45  
46 21 Mexico City, Mexico.

47  
48 22 <sup>6</sup> Clinical research division. National Institute of  
49  
50 23 Perinatology  
51  
52

53  
54  
55 24  
56  
57  
58  
59  
60

1  
2  
3 25 \*Corresponding author  
4

5 26 Julio Granados-Montiel. M.D.& Ph.D.  
6

7 27 Tissue Engineering and Regenerative Medicine Unit. National  
8

9 28 Institute of Rehabilitation  
10

11 29 Av. México-Xochimilco 289. Col. Arenal de Guadalupe, Tlalpan.  
12

13 30 14389, Mexico City, Mexico.  
14

15 31 ORCID ID: 0000-0002-0611-6421  
16

17 32 juliogram@gmail.com  
18

19 33  
20

21 34 Keywords: prophylaxis, SARS-CoV-2, COVID-19, health workers,  
22

23 35 hydroxychloroquine, bromhexine.  
24

25 36  
26

27 37  
28

29 38 Word count: 5,666  
30

31 39  
32

33 40  
34

35 41  
36

37 42  
38

39 43  
40

41 44  
42

43 45  
44

45 46  
46

47 47  
48

49 48  
50

1  
2  
3 494  
5 506  
7 518  
9 5210  
11 5312  
13  
14 54 **ABSTRACT**

15  
16  
17 55 **Introduction:** SARS-CoV-2 infection in Mexico has caused ~1  
18  
19 56 million confirmed cases; around 20-25% of health workers will  
20  
21 57 be infected by the virus at their workplace, with approximately  
22  
23 58 4.4% of mortality. High infectivity of SARS-CoV-2 is related  
24  
25 59 with cell entry mechanism, through the angiotensin-converting  
26  
27 60 enzyme (ACE) receptor. SARS-CoV-2 requires transmembrane  
28  
29 61 protease serine 2 (TMPRSS2) to cleave its spike glycoprotein  
30  
31 62 and ensure fusion of host cell and virus membrane. We propose  
32  
33 63 studying prophylactic treatment with hydroxychloroquine (HCQ)  
34  
35 64 and bromhexine (BHH), which have been shown to be effective in  
36  
37 65 preventing SARS-CoV-2 infection progression when administered  
38  
39 66 in early stages. The aim of this study is to assess the efficacy  
40  
41 67 of HCQ and BHH as prophylactic treatments for SARS-CoV-2  
42  
43 68 infection in healthy health workers exposed to the virus.

44  
45  
46 69 **Methods and analysis:** Double-blind randomized clinical trial,  
47  
48  
49 70 with parallel allocation at a 1:1 ratio with placebo, of low  
50  
51 71 doses of HCQ plus BHH, for 60 days. Study groups will be defined  
52  
53 72 as follows: 1) HCQ 200mg/d + BHH 8mg/8h vs 2) HCQ placebo plus  
54  
55  
56  
57  
58  
59  
60



1  
2  
3 73 BHH placebo. Primary endpoint will be efficacy of both  
4  
5 74 interventions for the prevention of SARS-CoV-2 infection,  
6  
7 75 determined by the risk ratio (RR) of infected personnel and  
8  
9 76 the absolute risk. At least a 16% reduction in absolute risk  
10  
11 77 is expected between the intervention and placebo groups; a  
12  
13 78 minimum of 20% infection is expected in the placebo group. The  
14  
15 79 sample size calculation estimated a total of 214 patients  
16  
17 80 assigned: two groups of 107 participants each.

21 **Ethics and dissemination:** This protocol has been approved by  
22  
23 82 the local Medical Ethics Committee (National Institute of  
24  
25 83 Rehabilitation 'Luis Guillermo Ibarra Ibarra', approval number  
26  
27 84 INRLGII/25/20) and by the Federal Commission for Protection  
28  
29 85 against Sanitary Risks (COFEPRIS, approval number  
30  
31 86 203300410A0058/2020). The results of the study will be  
32  
33 87 submitted for publication in peer-reviewed journals and  
34  
35 88 disseminated through conferences.

39 **Trial registration number 2a:** NCT04340349.

41 90 2b: NA

43 91 Protocol version: #4

44 92

### 48 93 **STRENGTHS AND LIMITATIONS OF THIS STUDY**

#### 50 94 *Strengths*

52  
53 95 ► This is a double-blind randomized single-centre clinical  
54  
55 96 trial, involving low doses of hydroxychloroquine and  
56  
57  
58  
59

1  
2  
3 97 bromhexine, adequately powered to provide clinically  
4  
5 98 relevant information regarding prophylactic treatment for  
6  
7 99 SARS-CoV-2 infection in health care personnel.

10 100 ► Bromhexine have minimal side effects, has been used in  
11  
12 101 the early infection with SARS-CoV-2 showing satisfactory  
13  
14 102 results and are commercially available worldwide.  
15  
16 103 Findings could be applied in a timely fashion in different  
17  
18 104 regions.

21 105

23 106 *Limitations*

26 107 ► Long-term use of hydroxychloroquine can cause heart rhythm  
27  
28 108 problems

30 109 ► For the moment, people who are not candidates to receive  
31  
32 110 the vaccine, due to chronic diseases or severe allergies,  
33  
34 111 will not be included.

37 112 ► Hydroxychloroquine has not been shown to have a  
38  
39 113 prophylactic effect; however, we believe that the use of  
40  
41 114 HCQ in conjunction with BHH may inhibit SARS-Cov-2  
42  
43 115 infection.

## 46 116 **INTRODUCTION**

48  
49 117 In Mexico, up to February 2021, have been produced more than  
50  
51 118 1.9 millions confirmed cases and ~170,000 deaths have  
52  
53 119 arisen[1]. The age group ranging between 30 and 79 years is  
54  
55 120 the most highly affected, where 81% present mild symptoms, 14%

1  
2  
3 121 severe and 5% critical, requiring intensive care unit  
4  
5 122 management.

6  
7 123 SARS-CoV-2 is a single-stranded RNA virion, member of the  
8  
9 124 *Betacoronavirus* genus [2]. SARS-CoV-2 has an incubation period  
10  
11 125 between 3 to 10 days, with different incubation periods related  
12  
13 126 with different clinical symptoms [3,4] . It is transmitted  
14  
15 127 through respiratory droplets from infected humans and through  
16  
17 128 contact with contaminated fomites and aerosols; moreover, even  
18  
19 129 asymptomatic persons in close contact can transmit the disease  
20  
21 130 [5]. The mechanism through which the virus infects the  
22  
23 131 respiratory cell is due to the angiotensin-converting enzyme  
24  
25 132 protein 2 (ACE-2). This receptor is found in multiple tissues  
26  
27 133 such as the oral cavity, brain, kidneys, intestine, and  
28  
29 134 placenta [6-8].

30  
31  
32  
33  
34 135 Health personnel is not exempt from contracting the disease.  
35  
36 136 In China, it was reported that 3.5-4.4% of the infected  
37  
38 137 population belonged to this group, and 14.8% presented  
39  
40 138 characteristics of severity or critical illness [4,9,10].  
41  
42 139 Italy, around 20% of healthcare professionals became infected  
43  
44 140 [11]; mean age of health workers who died was 55 years (range  
45  
46 141 of 29-72 years) and mean period from hospital admission to  
47  
48 142 death was 19 days, (range 1-47 days) [9].

49  
50  
51 143 Treatment of the SARS-Cov-2 infection has led different  
52  
53 144 research groups to work on the development of vaccines.  
54  
55  
56  
57  
58  
59  
60

1  
2  
3 145 However, the use of vaccines can be a challenge. The first  
4  
5 146 trials have shown that the immune protection is not 100% and  
6  
7 147 the protection is only temporary, so it will be necessary to  
8  
9 148 carry out the vaccination periodically. On the other hand,  
10  
11 149 because the virus is RNA and the mutation rate is high, we can  
12  
13 150 expect new variants that reduce or nullify the effectiveness  
14  
15 151 of the vaccines, this depends on the origin of vaccine, if it  
16  
17 152 is made with viral vectors (such as from CanSino or  
18  
19 153 AstraZeneca), if it is mRNA (such as from Moderna or Pfizer-  
20  
21 154 BioNTech) or if it is inactivated virus (Sinovac). Mainly  
22  
23 155 because the development of vaccine that can be efficient for  
24  
25 156 the new variants could be delayed and this could once again  
26  
27 157 increase the number of people who acquire the SARS-CoV-2 virus.  
28  
29 158 On the other hand, around the world there are groups of people  
30  
31 159 who are against vaccination, or people that have severe  
32  
33 160 allergies, as well as populations that will take much longer  
34  
35 161 to reach the moment when they can acquire the vaccine, so it  
36  
37 162 is extremely necessary that people who do not vaccinate by  
38  
39 163 choice, by disease or by the lack of the vaccine, have an  
40  
41 164 alternative to avoid infection and avoid the spread of the  
42  
43 165 virus.  
44  
45 166 Therefore, it is important to develop a pharmacological  
46  
47 167 strategy that allows the use of prophylactic drugs for the  
48  
49 168 prevention of SARS-CoV-2 infection.  
50  
51  
52  
53  
54  
55  
56  
57  
58  
59  
60

1  
2  
3 169 Chloroquine (CQ) and Hydroxychloroquine (HCQ) are known as an  
4  
5 170 antimalarial agent; HCQ is a hydroxylated derivative from CQ.  
6  
7 171 CQ and HCQ have gained attention as possible therapies in  
8  
9 172 Covid-19 disease. In overdose, both drugs can cause severe,  
10  
11 173 potentially life-threatening effects as visual disturbances,  
12  
13 174 corneal opacities, irreversible retinopathy can occur with  
14  
15 175 cumulative doses exceeding 100 grams. When lower daily doses  
16  
17 176 (250 mg are used) retinopathy may not occur after many years  
18  
19 177 of treatment [12]. The above indicates that the use of HCQ at  
20  
21 178 low doses, to avoid SARS-CoV-2 infection, does not produce  
22  
23 179 toxicity and could be used as a prophylactic treatment. HCQ  
24  
25 180 has been used in several viral infections, for example, as  
26  
27 181 replication inhibitor for the dengue virus, decreasing in vitro  
28  
29 182 virus infection and promoting activation of different  
30  
31 183 immunological signal pathways [13]. It has also been used to  
32  
33 184 treat patients infected with hepatitis C virus decreasing viral  
34  
35 185 load, with minimal adverse effects reported [14]. HCQ has been  
36  
37 186 reported to block viral infection by increasing the endosomal  
38  
39 187 pH required for virus fusion to the cell, as well as interfere  
40  
41 188 with SARS-CoV-2 cell receptors, through inhibition of ACE2  
42  
43 189 glycosylation receptor [15-18]. HCQ has immunomodulatory  
44  
45 190 effects; it inhibits production and release of pro-inflammatory  
46  
47 191 cytokines, that are associated with severe disease development  
48  
49  
50  
51 192 [19,20] . Recently, it has been reported that HCQ works as a  
52  
53  
54  
55  
56  
57  
58  
59  
60

1  
2  
3 193 autophagy inhibitor, interfering with viral infection and  
4  
5 194 replication [21]. There is recent evidence that HCQ could be  
6  
7 195 used to treat COVID-19; studies in high-risk patients show that  
8  
9 196 the use of HCQ was associated with a lower risk of intubation  
10  
11 197 or death [22]. Recent study showed that pre-treatment with HCQ  
12  
13 198 has shown a better effect on antiviral activity [17] and it  
14  
15 199 has been reported that loading doses of 1600 mg HCQ followed  
16  
17 200 by 600 mg daily doses are needed have a relevant effect to  
18  
19 201 SARS-CoV-2 inhibition within 72 hours in 60% of COVID-19  
20  
21 202 patients [23]. Finally, a study where evaluated the antiviral  
22  
23 203 mechanisms of CQ and the adverse effects, repositioned the CQ  
24  
25 204 to have more efficacy when used as a prophylactic treatment  
26  
27 205 rather than as a therapeutic [24]. On the other hand, CQ and  
28  
29 206 HCQ has been reported to have various adverse effects, the CQ  
30  
31 207 being the most toxic in overdose. However, it was recently  
32  
33 208 published that *in vivo* trials are lacking to determine whether  
34  
35 209 this drug is useful as a prophylactic treatment against SARS-  
36  
37 210 Cov-2 [25]. Based on the above, do more studies will be  
38  
39 211 important to determine its effectiveness at low doses (<250  
40  
41 212 mg) as a prophylactic treatment.  
42  
43 213 Another pharmacological option to treat SARS-CoV-2 infection  
44  
45 214 is Bromhexine (BHH). BHH modifies the composition of mucus,  
46  
47 215 increases ciliary clearance and decreases coughing, improving  
48  
49 216 respiratory symptoms. It has also been reported to enhance the  
50  
51  
52  
53  
54  
55  
56  
57  
58  
59  
60

1  
2  
3 217 effects of some antibiotics [26]. The mechanism by which SARS-  
4  
5 218 CoV-2 enters human cells depends on the ACE-2 receptor and the  
6  
7 219 human transmembrane serine protease (TMPRSS2), on which BHH  
8  
9 220 has a specific inhibitory effect [27,28]. BHH has been used to  
10  
11 221 treat pneumonic damage in both lungs during early infection  
12  
13 222 [29]. BHH turns out to be an ideal candidate for SARS-CoV-2  
14  
15 223 treatment, since it has few contraindications, and its side  
16  
17 224 effects are minimal, demonstrating an extensive margin of  
18  
19 225 pharmacological safety. BHH is widely available over the  
20  
21 226 counter, and its low cost makes it an ideal therapeutic option.  
22  
23 227 According to a letter published in the New England Journal of  
24  
25 228 Medicine, of 77,262 patients infected by SARS-CoV-2, 3387  
26  
27 229 (4.4%) were health workers [9]. Of these, 23 have died from  
28  
29 230 this disease. The prevalence of infections in health personnel  
30  
31 231 is alarming since health services in first world countries have  
32  
33 232 been overwhelmed by this disease. In Italy, around 20% of  
34  
35 233 health professionals had a SARS-CoV-2 infection [11]. Faced  
36  
37 234 with a highly contagious disease, the care of health workers,  
38  
39 235 who are first line of contact and on whom the health system of  
40  
41 236 each country depends, is essential. This research regarding  
42  
43 237 the use of HCQ and BHH in health personnel will allow us to  
44  
45 238 determine and compare the effectiveness of both interventions,  
46  
47 239 which is of vital importance to clarify whether these  
48  
49 240 treatments may prevent the appearance of infection in this  
50  
51  
52  
53  
54  
55  
56  
57  
58  
59  
60

241 population. Describing for the first time that HCQ plus BHH  
242 could function for disease prevention, would allow us to  
243 provide prophylaxis to health professionals worldwide.  
244 Therefore, the use of HCQ and BHH in healthy health personnel  
245 exposed to patients with confirmed or suspected SARS-CoV-2 will  
246 significantly reduce infection.

247

248

249

250

251

## 252 **METHODS AND ANALYSIS**

### 253 **Study design**

254 Double-blind randomized clinical trial, with parallel  
255 allocation at a 1:1 ratio with HCQ + BHH vs placebo for both  
256 drugs for 60 days, to determine the efficacy of the combined  
257 drugs for the prevention of SARS-CoV-2 infection in healthcare  
258 workers.

259

260

### 261 **Participants**

262 The study will be carried out at the "Instituto Nacional de  
263 Rehabilitación, Luis Guillermo Ibarra Ibarra" (INR-LGII). This  
264 institution is a tertiary hospital that at this time has not



1  
2  
3 265 been designated as a COVID-19 centre. The Mexican government  
4  
5 266 defined 3 phases to determine risk for SARS-CoV-2 infection:  
6  
7 267 imported cases from outside Mexico; community infection and  
8  
9 268 spread of the disease throughout the country (also known as  
10  
11 269 Phase 3). In the latter, it is assumed that every person who  
12  
13  
14 270 enters a hospital is a potentially infected carrier; currently  
15  
16 271 our centre is in Phase 3. Likewise, health personnel who work  
17  
18 272 at the "Instituto Nacional de Ciencias Médicas y Nutrición,  
19  
20 273 Salvador Zubirán" (INCMNSZ), which is a COVID-19 designated  
21  
22 274 tertiary centre, and who meet inclusion criteria of the  
23  
24 275 protocol will be invited to participate in the study.

26  
27  
28 276 Inclusion of participants will be assessed according to the  
29  
30 277 eligibility criteria. Table 1 shows the classification and  
31  
32 278 characteristics of study variables. Continuous variables will  
33  
34 279 be assessed for normality. Variables with a normal distribution  
35  
36 280 will be compared using Student's t-test, non-parametric  
37  
38 281 variables using the Mann-Whitney U-test. Categorical variables  
39  
40 282 will be evaluated using the Chi-squared test.

#### 41 42 43 44 283 *Inclusion criteria*

- 45  
46 284 ► Health personnel working at INR LGII or INCMNSZ who wish  
47  
48 285 to participate in the study and sign the informed consent.  
49  
50 286 ► Over 18 and under 60 years of age, both genders.  
51  
52 287 ► Contacting with suspected or confirmed SARS-CoV-2  
53  
54 288 infection.  
55  
56  
57  
58  
59  
60

1  
2  
3 289 ▶ Normal electrocardiogram.  
4

5 290 *Exclusion criteria*  
6

7  
8 291 ▶ Positive quantitative reverse transcriptase-polymerase  
9  
10 292 chain reaction (qRT-PCR) test for SARS-CoV-2 at the time  
11  
12 293 of inclusion.  
13

14 294 ▶ Panel of IgG or IgM antibodies positive for SARS-CoV-2 at  
15  
16  
17 295 the time of inclusion.  
18

19 296 ▶ Development of respiratory symptoms suspicious of SARS-  
20  
21 297 CoV-2 infection during the first 7 days after treatment  
22  
23 298 is initiated, confirmed by qRT-PCR and IgG or IgM  
24  
25 299 antibodies postiver for SARS-CoV-2.  
26  
27

28 300 ▶ Health personnel with comorbidities such as diabetes,  
29  
30 301 hypertension, autoimmune diseases (i.e., porphyria,  
31  
32 302 psoriasis, systemic lupus erythematosus), obesity  
33  
34 303 (defined as body mass index  $\geq 30$ ), cardiovascular diseases,  
35  
36 304 respiratory diseases (such as asthma, chronic bronchitis,  
37  
38 305 idiopathic pulmonary fibrosis).  
39  
40

41  
42 306 ▶ History of allergies to any hydroxychloroquine or  
43  
44 307 bromhexine related compound or medication.  
45

46 308 ▶ Use of immunosuppressors for any reason.  
47

48  
49 309 ▶ History of bone marrow transplant.  
50

51 310 ▶ Known glucose-6-phosphate dehydrogenase deficiency.  
52  
53  
54  
55  
56  
57  
58  
59  
60

- 1  
2  
3 311 ▶ Chronic kidney disease or glomerular filtration  
4  
5 312 <20ml/min.  
6  
7 313 ▶ Use of other drugs with reported pharmacological  
8  
9 314 interactions (i.e., digitalis, flecainide, amiodarone,  
10  
11 315 procainamide, or propafenone).  
12  
13 316 ▶ History of long QT syndrome.  
14  
15 317 ▶ Electrocardiogram with QTc>500 msec.  
16  
17 318 ▶ Pregnant or breastfeeding personnel.  
18  
19 319 ▶ Epilepsy.  
20  
21 320 ▶ Known liver disease.  
22  
23 321 ▶ Personnel who have received the Covid-19 vaccine  
24  
25  
26  
27  
28

29 *Elimination criteria*

- 30  
31 323 ▶ Personnel who decide to leave the study for any reason  
32  
33 324 not related to adverse events.  
34  
35 325 ▶ Personnel with incomplete information on the primary  
36  
37 326 outcome (qRT-PCR for SARS-CoV-2).  
38  
39 327 ▶ Personnel who are relocated to work in another  
40  
41 328 institution.  
42  
43 329 ▶ Personnel who do not wish to participate in the study  
44  
45  
46  
47  
48

49 330

50 331 **Table 1.** Classification and characteristics of study variables.

| Variable | Conceptual definition                   | Operational definition | Type         |
|----------|-----------------------------------------|------------------------|--------------|
| Age      | Date at recruitment minus date of birth | Years of age           | Quantitative |

|                 |                                                                                     |                                                                                                                                 |                            |
|-----------------|-------------------------------------------------------------------------------------|---------------------------------------------------------------------------------------------------------------------------------|----------------------------|
| Gender          | Male or female genotype of the person                                               | Male/female                                                                                                                     | Qualitative<br>nominal     |
| Weight          | How much the patient weighs at the time of study inclusion                          | Weight, kilograms                                                                                                               | Continuous<br>quantitative |
| Size            | How tall is the patient from head to toe at the time of study inclusion             | Height, centimetres                                                                                                             | Continuous<br>quantitative |
| Body mass index | The division between weight by height squared at the time of inclusion in the study | Units of Kg/cm <sup>2</sup>                                                                                                     | Continuous<br>quantitative |
| Occupation      | Remunerative work performed by the participant at the time of recruitment           | Unemployed, informal, unskilled employee, micro-entrepreneur or saleswoman, administrative employee, professional, entrepreneur | Qualitative<br>nominal     |
| Civil status    | Civil status of the individual                                                      | Married, single, widowed, divorced, common-law union                                                                            | Qualitative<br>nominal     |
| Level of study  | Years completed and approved at the time of study recruitment                       | No studies, primary, secondary, preparatory, technical career, undergraduate, postgraduate                                      | Ordinal<br>qualitative     |

|                      |                                                                                                                                                               |                                                 |                     |
|----------------------|---------------------------------------------------------------------------------------------------------------------------------------------------------------|-------------------------------------------------|---------------------|
| Alcohol intake       | Consumption of alcoholic beverages                                                                                                                            | Intake of alcoholic beverages                   | Qualitative nominal |
| Smoking habit        | Habitual tobacco uses at the time of recruitment                                                                                                              | Number of packs of cigarettes consumed per day. | Quantitative        |
| Drug's use           | Regular use of chemicals such as amphetamines, cocaine, marijuana, LSD, heroin, glass                                                                         | Consumption of drugs                            | Qualitative nominal |
| Hypertension         | Elevation of blood pressure >130/80                                                                                                                           | Positive/negative                               | Qualitative nominal |
| Asthma               | Chronic inflammatory disease characterized by bronchial hyperactivity with recurrent episodes of bronchospasm                                                 | Positive/negative                               | Qualitative nominal |
| Diabetes             | Group of metabolic diseases, which occurs when the pancreas does not produce enough insulin or when the body does not use the insulin it produces effectively | Positive/negative                               | Qualitative nominal |
| Obesity              | Pathological state characterized by a general excess or excessive accumulation of fat in the body                                                             | Positive/negative                               | Qualitative nominal |
| SARS-CoV-2 pneumonia | A form of severe pneumonia caused by coronavirus                                                                                                              | Positive/negative                               | Qualitative nominal |
| Death                | Statistical term that describes the death of an individual                                                                                                    | Positive/negative                               | Qualitative nominal |

|                     |                                                                                                                                                                                                                                                                                                                                                                                                                                                                                                                                                  |                   |                     |
|---------------------|--------------------------------------------------------------------------------------------------------------------------------------------------------------------------------------------------------------------------------------------------------------------------------------------------------------------------------------------------------------------------------------------------------------------------------------------------------------------------------------------------------------------------------------------------|-------------------|---------------------|
| Intensive Care Unit | Special facility in a hospital area, which provides life support to critically ill patients, requiring intensive supervision and monitoring                                                                                                                                                                                                                                                                                                                                                                                                      | Positive/negative | Qualitative nominal |
| Severe pneumonia    | Defined by the American Thoracic Society Criteria requiring at least one main criterion (need for invasive mechanical ventilation and shock with need for vasopressors), or three minor criteria (respiratory rate > 30 bpm, PaO <sub>2</sub> / FiO <sub>2</sub> ratio <250, Infiltrates multilobars, confusion / disorientation, uremia [BUN > 20 mg / dL], leukopenia [ $<4,000$ ], thrombocytopenia [ $<100,000$ platelets / mm <sup>3</sup> ], hypothermia [core temperature <36°C], or hypotension requiring aggressive fluid resuscitation | Positive/negative | Qualitative nominal |
| Pneumonia           | Acute infection of the lung parenchyma, accompanied by bilateral infiltrates on chest X-ray                                                                                                                                                                                                                                                                                                                                                                                                                                                      | Positive/negative | Qualitative nominal |
| Confusion           | Glasgow scale less than 15                                                                                                                                                                                                                                                                                                                                                                                                                                                                                                                       | Positive/negative | Qualitative nominal |
| Hypothermia         | Body temperature less than 36 degrees Celsius                                                                                                                                                                                                                                                                                                                                                                                                                                                                                                    | Positive/negative | Qualitative nominal |
| Thrombocytopenia    | Total platelets less than 100,000 per mm <sup>3</sup> .                                                                                                                                                                                                                                                                                                                                                                                                                                                                                          | Positive/negative | Qualitative nominal |

|                                                         |                                                                                                                                                                                                       |                   |                     |
|---------------------------------------------------------|-------------------------------------------------------------------------------------------------------------------------------------------------------------------------------------------------------|-------------------|---------------------|
| Arterial hypotension                                    | Systolic blood pressure less than 90 mmHg or mean arterial pressure less than 60 mmHg                                                                                                                 | Positive/negative | Qualitative nominal |
| Sepsis                                                  | Rapid SOFA score (qSOFA) with 2 of the following three clinical variables: Glasgow $\leq 13$ , systolic pressure $\leq 100$ mm Hg, or respiratory rate $\geq 22$ bpm                                  | Positive/negative | Qualitative nominal |
| qRT-PCR for SARS-CoV-2                                  | Molecular diagnosis for SARS-CoV-2 from viral RNA                                                                                                                                                     | Positive/negative | Qualitative nominal |
| Septic shock                                            | Arterial hypotension that persists after resuscitation volume and that requires vasopressors to maintain MAP $\geq 65$ mm Hg and lactate $\geq 2$ mmol / L (18 mg / dL) in the absence of hypovolemia | Positive/negative | Qualitative nominal |
| Adverse events related to the use of Hydroxychloroquine | Indirect drug-related mortality, nausea, vomiting, abdominal pain, rash, itchy skin, hair loss, QT segment elongation on electrocardiogram, corneal opacity, cardiac arrhythmias, and heart failure   | Positive/negative | Qualitative nominal |
| Adverse events related to the use of Bromhexine         | Indirect drug-related mortality, nausea, vomiting, abdominal pain, rash, diarrhea.                                                                                                                    | Positive/negative | Qualitative nominal |

332

333 **Sample size calculation**

1  
2  
3 334 According to the study by Remuzzi A et al. [11], the proportion  
4  
5 335 of healthcare workers infected with SARS-CoV-2 and confirmed  
6  
7 336 by RT-PCR was 20%. Taking this 20% as our null hypothesis, we  
8  
9  
10 337 estimate that the proportion of infections in the intervention  
11  
12 338 group will be 4%. Using a two-tailed test, with a type I error  
13  
14 339 of 0.05, a power of 90%, and taking into account a loss of 10%  
15  
16 340 of participants for each group, we estimate that a total of  
17  
18 341 214 participants will be required, distributed in parallel  
19  
20  
21 342 groups (1:1) of 107 each. This number of volunteers will allow  
22  
23 343 us to find a difference of 16% between groups with a power of  
24  
25 344 90% and an attrition of 20%. To ensure that desired sample  
26  
27 345 size is reached, all health workers involved in managing  
28  
29 346 patients suspected or infected by SARS-CoV-2 will be invited  
30  
31 347 personally and by institutional email.  
32  
33  
34

35 348

### 37 349 **Interventions**

39 350 Interventions will consist of low doses of HCQ 200 mg tablets  
40  
41 351 every 24 hours for 60 days plus BHH 8 mg tablets every 8  
42  
43 352 hours for 60 days. Study groups will be defined as follows: 1)  
44  
45 353 HCQ plus BHH vs placebo for both drugs. Fabrication of both  
46  
47 354 drugs and placebos will be provided to our centre by a hired  
48  
49 355 laboratory. Both drugs will be provided to participants  
50  
51 356 directly at the hospital by a researcher blinded to group  
52  
53 357 assignment process. To ensure that the intervention is carried  
54  
55  
56  
57  
58  
59  
60



1  
2  
3 358 out, each participant will be asked to keep a written record  
4  
5 359 of the days and time the medication was administered. This  
6  
7 360 document will be reviewed weekly to verify that more than 50%  
8  
9 361 adherence to treatment is maintained. Participants will be  
10  
11 362 asked to record any symptoms related to the use of the  
12  
13 363 medication, which will be reviewed by a researcher blinded to  
14  
15 364 group assignment, weekly, or at the participants' request.  
16  
17  
18  
19  
20

21 366 If any of the participants present symptoms of SARS-CoV-2  
22  
23 367 infection after the first 14 days from the beginning of the  
24  
25 368 intervention or positive qRT-PCR is present, the drug will not  
26  
27 369 be discontinued. If the participant presents adverse events  
28  
29 370 related to the drugs that are severe or intolerable, treatment  
30  
31 371 will be suspended. If the participants report an adherence of  
32  
33 372 less than 50% of the medication, the intervention will not be  
34  
35 373 discontinued to avoid imbalances between groups. Use of drugs  
36  
37 374 that interact with HCQ or BHH such as flecainide, digitalis,  
38  
39 375 amiodarone, procainamide or propafenone will be prohibited. If  
40  
41 376 a participant has to use these drugs during the study period,  
42  
43 377 they will be eliminated from the study. A free diet and outdoor  
44  
45 378 activity will be allowed since these do not intervene with the  
46  
47 379 implementation of the treatment or have interaction with the  
48  
49 380 drugs used. Finally, incidence of adverse events such as  
50  
51 381 nausea, vomiting, abdominal pain, rash, itchy skin, hair loss,  
52  
53  
54  
55  
56  
57  
58  
59  
60

1  
2  
3 382 lengthening of the QT interval in the electrocardiogram,  
4  
5 383 corneal opacity, cardiac arrhythmias, heart failure and death  
6  
7 384 will be determined.  
8  
9

10 385

11  
12 386 **Randomization and treatment allocation**  
13

14 387 Group randomization will be in a centralized and  
15  
16 388 straightforward way using the Web program  
17  
18 389 www.randomization.com. It will be carried out independently by  
19  
20  
21 390 a researcher blinded to inclusion criteria, delivery of  
22  
23 391 medication, participant follow-up, results, statistical  
24  
25 392 analysis, and writing of the final manuscript. Allocation will  
26  
27 393 be established, for 214 participants in blocks of 107 assigned.  
28  
29 394 The selection of health workers will be made regardless of the  
30  
31 395 hospital shift, work schedule, or assigned area. If the desired  
32  
33 396 sample size is not reached, the inclusion of personnel involved  
34  
35 397 in the first line of care of other referral hospitals for  
36  
37 398 patients with SARS-CoV-2 will be considered.

38  
39  
40 399 An independent researcher will allocate patients to the desired  
41  
42 400 groups. Envelopes will be correctly sealed by the pharmacy  
43  
44 401 department and will contain HCQ plus BHH or placebos as  
45  
46 402 previously mentioned. In those who do not require HCQ and BHH,  
47  
48 403 the drug will be replaced by tablets identical in colour and  
49  
50 404 taste but lacking the active substance. In this way, drugs used  
51  
52 405 in both groups will be indistinguishable.  
53  
54  
55  
56  
57  
58  
59  
60

1  
2  
3 406  
4

5 407 Researcher A will recruit the participants and assess the  
6  
7 408 inclusion criteria according to the serological,  
8  
9 409 electrocardiographic, biochemical results and clinical  
10  
11 410 investigation. Once included, volunteers will go to another  
12  
13 411 office with researcher B, who will be blinded to the first  
14  
15 412 procedure and the rest of the study. Researcher B will assign  
16  
17 413 the groups independently, centrally, and through the use of  
18  
19 414 the web program. This same researcher will be the one who makes  
20  
21 415 the packages indistinguishable to the person providing the  
22  
23 416 drugs to the participant. Researcher C will provide treatment  
24  
25 417 in a sealed envelope or box to the participant in the order of  
26  
27 418 assignment, without knowing each participant's study group.  
28  
29 419 This researcher will also be blinded to the rest of the results.  
30  
31 420 Participants will be blinded to the treatment they will  
32  
33 421 receive. The researchers performing follow-up, researchers for  
34  
35 422 result assessment, and the researcher who performs the  
36  
37 423 statistical analysis will be blinded.  
38  
39  
40  
41  
42  
43

44 424

45  
46 425 Informed consent will be obtained only by researcher A. If  
47  
48 426 researcher A is not available, the study administrator may  
49  
50 427 obtain informed consent for participation. The informed consent  
51  
52 428 will contain the authorization to participate in the study and  
53  
54 429 the authorization for taking biological samples,  
55  
56  
57  
58  
59  
60

1  
2  
3 430 electrocardiogram, and authorization to handle personal  
4  
5 431 information. All participants will complete a written informed  
6  
7 432 consent included on the first page of the questionnaire that  
8  
9 433 requires permission to participate in the study. No candidate  
10  
11 434 is required to participate in the study, and their  
12  
13 435 participation is based on the agreement that they may withdraw  
14  
15 436 at any time. All participants have the right to withdraw from  
16  
17 437 the study if they feel uncomfortable answering a question or  
18  
19 438 with a test to be performed. Also, no one, including the  
20  
21 439 research team, will require a reason why the participant  
22  
23 440 decides to leave the study.

24  
25  
26  
27  
28 441 In order to protect participant confidentiality, each one will  
29  
30 442 be assigned a participation number, and all biological samples,  
31  
32 443 as well as medical history information, will be identified by  
33  
34 444 the participant's initials and participant number. Part of the  
35  
36 445 confidentiality protection process will include data capture  
37  
38 446 only by the researcher in charge of data capture (researcher  
39  
40 447 D), who will be the same for all participants and the entire  
41  
42 448 study. Secondly, the study administrator may also enter data  
43  
44 449 into the database if researcher D is unavailable.

45  
46  
47  
48 450

49  
50 451 The study administrator will be blinded to allocation and  
51  
52 452 results of the participants. However, the administrator will  
53  
54 453 be the only one who will be able to reveal the group and  
55  
56  
57  
58  
59  
60

1  
2  
3 454 treatment assignment in any of the cases: major adverse events  
4  
5 455 such as cardiac arrhythmias, heart failure, major neurological  
6  
7 456 abnormalities, atrial or ventricular fibrillation, kidney  
8  
9  
10 457 failure, or any adverse event related to pharmacological  
11  
12 458 treatment that endangers the life or any organ of the  
13  
14 459 participant's body. The objective of revealing the assignment  
15  
16 460 by the study administrator will be to provide the participant  
17  
18 461 of a timely treatment according to the drugs ingested.  
19  
20  
21 462

### 22 23 463 **Participant timeline and intervention**

24  
25 464 The inclusion of participants will be evaluated according to  
26  
27 465 the eligibility criteria and by invitation. Volunteers who wish  
28  
29 466 to participate in the study will be summoned the next day at a  
30  
31 467 specialized office to carry out all the relevant studies to  
32  
33 468 ensure the inclusion criteria. These include a medical history,  
34  
35 469 anthropometric measurements such as weight and body mass index,  
36  
37 470 electrocardiogram (every week until the end of the study or  
38  
39 471 when the participant requests it if they have any discomfort),  
40  
41 472 hematic biometry, complete blood chemistry, and serological  
42  
43 473 test for antibodies and qRT-PCR for SARS-CoV-2. Volunteers will  
44  
45 474 be asked for information to contact them once the serological  
46  
47 475 results are obtained.  
48  
49  
50

51  
52 476 Once the results are obtained (approximately 3 days), personnel  
53  
54 477 eligible to participate in the study will be contacted. They  
55  
56  
57  
58  
59  
60

1  
2  
3 478 will meet in a particular office to speak with a researcher  
4  
5 479 who will be in charge of carrying out the eligibility criteria  
6  
7 480 and medical history checklist. This researcher will be  
8  
9 481 different from the one who makes the assignment, who delivers  
10  
11 482 the medicine and the one who evaluates the results and performs  
12  
13 483 the statistical analysis. The assignment of the group of each  
14  
15 484 participant will be performed, and the participant will not  
16  
17 485 know the group they have been assigned. This information will  
18  
19 486 be known for the researcher in charge, unrelated to the  
20  
21 487 delivery of the treatment, results, or inclusion of the  
22  
23 488 participant in the study. After the assignment, the volunteers  
24  
25 489 will receive the assigned treatment at the pharmacy using a  
26  
27 490 code in a sealed envelope assigned by the Web. Participants  
28  
29 491 who meet the inclusion criteria and there is no reason for  
30  
31 492 exclusion will proceed to the second phase of group assignment  
32  
33 493 with researcher B, the next business day at a different time  
34  
35 494 or office than researcher A.  
36  
37  
38  
39  
40  
41  
42  
43

44 496 The group of researchers in charge of monitoring the  
45  
46 497 participants, who will be blinded to the group assignment at  
47  
48 498 all times, will be in charge of assessing each participant's  
49  
50 499 adverse event and treatment adherence record weekly. These  
51  
52 500 follow-up researchers will be available 24 hours a day  
53  
54 501 throughout the week if participants experience undesirable  
55  
56  
57  
58  
59  
60

1  
2  
3 502 adverse events that require urgent attention or that do not  
4  
5 503 allow them to continue with drug treatment. If this situation  
6  
7 504 happens, the researcher in charge of the follow-up will contact  
8  
9 505 the study administrator to reveal to the treating physicians  
10  
11 506 the treatment received by the participant. Health evaluation  
12  
13 507 of all participants will be performed at day 30, day 60 and  
14  
15 508 day 90, this includes electrocardiogram analysis, blood  
16  
17 509 chemistry analysis, antibody test, qRT-PCR, or at request of  
18  
19 510 the participant due to adverse clinical symptoms.  
20  
21  
22

23 511 At the end of the first 60 days, a new qRT-PCR will be requested  
24  
25 512 from each participant. All participants who present symptoms  
26  
27 513 after the first 7 days of initiation of the intervention, will  
28  
29 514 be considered as a positive individual for the analysis and  
30  
31 515 will not be excluded from the study. The same action will be  
32  
33 516 carried out 90 days after the start of treatment for both  
34  
35 517 groups. After 60 days, the treatment will be suspended and the  
36  
37 518 results of the qRT-PCR samples for SARS-CoV-2 will be  
38  
39 519 evaluated. After finishing the intervention (60 days), all  
40  
41 520 participants will be followed-up 30 more days with a new qRT-  
42  
43 521 PCR at day 90 after initiation of the intervention and 30 days  
44  
45 522 after the end of the intervention, to assess the efficacy or  
46  
47 523 the treatment during the follow-up period.  
48  
49  
50  
51  
52

53 524

54  
55 525 **Outcome measures**  
56  
57  
58  
59  
60

1  
2  
3 526 This study compares the efficacy of the use of HCQ plus BHH  
4  
5 527 (as a conjoined treatment) in prophylactic doses for 60 days  
6  
7 528 in healthy health personnel exposed to the first line of care  
8  
9 529 in confirmed patients with suspected infection by SARS-CoV-2.

10  
11  
12 530

13  
14 531 *Primary endpoint*

15  
16 532 The primary endpoint will be the proportion of health personnel  
17  
18 533 infected by SARS-CoV-2 at 60 days after starting treatment, in  
19  
20 534 both groups. The infection will be diagnosed using qRT-PCR for  
21  
22 535 relative expression of the mRNA SARS-CoV-2 and the measure of  
23  
24 536 IgM and IgG antibodies anti-SARS-CoV-2 after day 7 of treatment  
25  
26 537 using rapid test Cellex qSARS-CoV-2 IgG/IgM. All participants  
27  
28 538 presenting symptoms with positive qRT-PCR after 7 days of  
29  
30 539 initiation of the intervention, will be considered positive  
31  
32 540 and will be included in the analysis. The study period will be  
33  
34 541 90 days (60 days for the primary end point plus 30 days of  
35  
36 542 follow-up). The proportion of infected personnel will be  
37  
38 543 evaluated using relative risk (RR) and absolute risk increase  
39  
40 544 (ARI) with their respective 95% confidence intervals, in the  
41  
42 545 established time. The disease-free period in the 60 days will  
43  
44 546 also be evaluated by analysing the cumulative incidence of  
45  
46 547 healthy personnel, and the presence of confirmed infection by  
47  
48 548 qRT-PCR of SARS-CoV-2 and IgM and IgG antibodies anti-SARS-  
49  
50 549 CoV-2 will be the outcome. The censoring variable will be the  
51  
52  
53  
54  
55  
56  
57  
58  
59  
60



1  
2  
3 550 discontinuation of treatment either due to death, adverse  
4  
5 551 events, or any elimination criteria. Since there is the  
6  
7 552 possibility of false positives and negatives with qRT-PCR, we  
8  
9 553 will perform qualitative measurements of IgM and IgG with the  
10  
11 554 Cellex qSARS-CoV-2 IgG/IgM Rapid test from test from which is  
12  
13 555 authorized by FDA. The test can be used on serum, plasma, or  
14  
15 556 whole blood samples. The clinical sensitivity of the assay was  
16  
17 557 93.8% and the clinical specificity was 96%[30].  
18  
19  
20  
21  
22

### 23 559 *Secondary endpoints*

24  
25 560 The secondary endpoint will be the proportion of health  
26  
27 561 personnel infected 90 days after starting treatment in both  
28  
29 562 groups. The infection will be diagnosed using qRT-PCR for  
30  
31 563 relative expression of the mRNA of SARS-CoV-2 and the measure  
32  
33 564 of IgM and IgG antibodies anti-SARS-CoV-2 after day 7 of the  
34  
35 565 start of treatment using rapid test Cellex qSARS-CoV-2 IgG/IgM.  
36  
37 566 The study period will be 90 days. The proportion of infected  
38  
39 567 personnel will be evaluated using RR and ARI with their  
40  
41 568 respective 95% confidence intervals, in the established time.  
42  
43 569 The disease-free period in the 90 days will also be evaluated  
44  
45 570 by analysing the cumulative incidence of healthy personnel,  
46  
47 571 and the presence of confirmed infection by qRT-PCR of SARS-  
48  
49 572 CoV-2 will be the outcome. The censoring variable will be the  
50  
51  
52  
53  
54  
55  
56  
57  
58  
59  
60

1  
2  
3 573 discontinuation of treatment either due to death, adverse  
4  
5 574 events, or any elimination criteria.

6  
7 575 Also, secondary outcomes will be, in case of a positive SARS-  
8  
9 576 CoV-2 result, the need for oxygen use, admission to the  
10  
11 577 intensive care unit (ICU), presence of pneumonia by computer  
12  
13 578 tomography scan (CT), death, severe pneumonia defined by the  
14  
15 579 American Thoracic Association, time from hospitalization to  
16  
17 580 recovery in days.

18  
19 581 Another secondary endpoint will be adverse events, defined as  
20  
21 582 the presence of any of the following during the study period:  
22  
23 583 death, nausea, vomiting, abdominal pain, diarrhea, rash, itchy  
24  
25 584 skin, hair loss, lengthening of the QT interval in the  
26  
27 585 electrocardiogram (>500msec), corneal opacity, cardiac  
28  
29 586 arrhythmias, heart failure or kidney failure (renal clearance  
30  
31 587 <20ml/min). The proportion of the compound of adverse events  
32  
33 588 between the groups will be analysed using RR and ARI for 60  
34  
35 589 days with their respective 95% confidence intervals.

36  
37  
38  
39  
40  
41 590

42  
43 591 The efficacy of the treatment will be established as the  
44  
45 592 proportion of volunteers infected with SARS-CoV-2. This  
46  
47 593 difference should be sufficient to avoid overlapping of the  
48  
49 594 95% confidence intervals. It will be considered effective if  
50  
51 595 the intervals do not overlap and ineffective if when comparing  
52  
53 596 groups, they have a proportion of infected whose confidence  
54  
55  
56  
57  
58  
59  
60

1  
2  
3 597 intervals overlap. This type of evaluation will allow an  
4  
5 598 adequate understanding of the efficacy of the treatment in both  
6  
7 599 groups.  
8

9  
10 600

11  
12 601

13  
14 602

15  
16 603

17  
18  
19 604 **Handling and storage of data and documents**

20  
21 605 Before the start of the study, the researchers in charge of  
22  
23 606 the recruitment, assignment, and delivery of drugs will be  
24  
25 607 trained to perform the task assigned to them at least 3 days  
26  
27 608 before the start of the study.

28  
29  
30 609 Researcher A will assess the eligibility criteria of potential  
31  
32 610 participants and perform a detailed clinical examination to  
33  
34 611 assess whether they can participate in the study. The data that  
35  
36 612 will be collected initially will be the following:

37  
38  
39 613

40  
41 614 ► Medical history (includes personal data): study  
42  
43 615 identifier number, history number, name, date of birth,  
44  
45 616 gender, occupation, marital status, nationality, current  
46  
47 617 residence, degree of studies (primary, secondary, upper  
48  
49 618 secondary, bachelor`s degree, postgraduate), hospital  
50  
51 619 service to which they belong and the number of hours  
52  
53 620 worked per week.  
54  
55  
56  
57  
58  
59  
60

- 1  
2  
3 621 ▶ Personal history: alcohol intake (yes/no; how many glasses  
4  
5 622 of beer or alcoholic beverages do you consume per week),  
6  
7 623 smoking habit (yes/ no; and number of cigarettes per day),  
8  
9 624 drug use (yes/no), diet per week (dietary restrictions  
10  
11 625 and number of meals per day) and number of hours of sleep  
12  
13 626 per day.  
14  
15  
16 627 ▶ Gynaecological history (in women): Number of pregnancies,  
17  
18 628 number of live children, menarche, menopause.  
19  
20  
21 629 ▶ History of respiratory disease, history of  
22  
23 630 gastrointestinal disease, nephrological, neurological,  
24  
25 631 haematological, cardiovascular, allergies.  
26  
27  
28 632 ▶ Genetic family history, such as hypertension, diabetes,  
29  
30 633 heart disease, kidney disease.  
31  
32  
33 634 ▶ Physical examination: blood pressure, heart rate,  
34  
35 635 respiratory rate, temperature, weight, height, body mass  
36  
37 636 index, skin lesions, head and neck inspection, respiratory  
38  
39 637 inspection (chest symmetry, lung expansion, palpation of  
40  
41 638 the bases and preserved vertices, lung percussion,  
42  
43 639 auscultation for lung murmur, breath sounds).  
44  
45 640 Cardiovascular inspection (palpation of the fifth  
46  
47 641 intercostal space, auscultation of heart sounds, pulses  
48  
49 642 that are palpable and symmetrical), abdominal inspection  
50  
51 643 (palpation, percussion and auscultation of peristaltic  
52  
53 644 sounds), neurological evaluation (Glasgow, active  
54  
55  
56  
57  
58  
59  
60

1  
2  
3 645 motility, passive motility, reflex motility, cranial  
4  
5 646 nerves, sensitivity).

6  
7 647 ► Hematic biometry: haematocrit, leukocytes, segmented (%),  
8  
9 lymphocytes (%), monocytes (%), mean corpuscular volume,  
10 648  
11 platelets.  
12 649

13  
14 650 ► Blood chemistry: glycaemia, urea, creatinine, sodium,  
15  
16 potassium, chlorine, aspartate transaminase, alanine  
17 651  
18 transaminase, alkaline phosphatase, total bilirubin.  
19 652

20  
21 653 ► Muscle enzymes.

22  
23 654 ► Clotting times: thrombin time, prothrombin time,  
24  
25 international normalized ratio.  
26 655

27  
28 656 ► Electrocardiogram: rhythm, heart rate, heart axis,  
29  
30 evaluation of P wave, PR interval, duration of QRS, QT  
31 657  
32 interval, time of T wave. The electrocardiogram will be  
33 658  
34 performed using an instrument calibrated and validated  
35 659  
36 for its use internationally, weekly.  
37 660

38  
39  
40 661

41  
42 662 ► Molecular test results for IgG and IgM antibodies:

43  
44 663  
45 664 o The FDA approved product called Cellex qSARS-CoV-2  
46  
47 IgG/IgM Rapid Test will be used for serological  
48 665  
49 determination. The device cassette, sample, and  
50 666  
51 buffer solution must be at room temperature. The  
52 667  
53 sample (10 µL) is transferred to the center of the  
54 668  
55  
56  
57  
58  
59  
60

1  
2  
3 669 sample well. After the sample well is free of liquid,  
4  
5 670 two drops of sample diluent are added. After fifteen  
6  
7 671 to twenty minutes, read the test results. Results  
8  
9 672 should not be read after twenty minutes.

11  
12 673 o A positive IgM result occurs when a coloured band  
13  
14 674 appears on the M test line (M) and the control line  
15  
16 675 (C) and indicates that IgM against SARS-CoV-2 is  
17  
18 676 present.

19  
20  
21 677 o A positive IgG result occurs when a coloured band  
22  
23 678 appears on the G test line (G) and the control line  
24  
25 679 (C) and indicates that IgG against SARS-CoV-2 is  
26  
27 680 present.

28  
29  
30 681 o A positive result for IgM and IgG occurs when  
31  
32 682 coloured bands occur both M and G, as well as C.

33  
34 683 o A negative result occurs when a coloured band appears  
35  
36 684 in C only and indicates that IgM and IgG antibodies  
37  
38 685 against SARS-CoV-2 were not detected.

39  
40  
41 686 o An invalid result occurs when a colour band is not  
42  
43 687 produced in C, and the test must be repeated.

44  
45  
46 688 ► Official qRT-PCR results (carried out by INCMNSZ)

47  
48 689

49  
50  
51 690 All this information will be collected in a pre-established  
52  
53 691 medical history questionnaire for each potential participant.

54  
55 692 The information obtained from the weekly assessment of adverse  
56  
57  
58  
59  
60

1  
2  
3 693 events, and the results of the qRT-PCR for SARS-CoV-2 at 60  
4  
5 694 and 90 days (60 for the primary end point plus 30 more days of  
6  
7 695 follow-up) after starting treatment will be entered into an  
8  
9 696 online database. In order to ensure the quality of the data  
10  
11 697 collection, the database will be built in CASTOR, a database  
12  
13 698 on the Web that allows entering all the pre-defined data for  
14  
15 699 each participant, thus reducing human error. This information  
16  
17 700 will be stored on a server in the United States of America and  
18  
19 701 can only be accessed by the study's administrator. The data  
20  
21 702 may only be entered by a researcher in charge of collecting  
22  
23 703 the data sheets and emptying them.  
24  
25  
26  
27  
28  
29

### 30 **Monitoring and quality assurance**

31  
32 706 Every possible adverse event will be noted daily by the  
33  
34 707 participants in the agenda that will be delivered to them. This  
35  
36 708 agenda will be evaluated weekly by the researcher in charge of  
37  
38 709 monitoring the participants (who will be blinded to group  
39  
40 710 assignment). In case of unbearable adverse events for the  
41  
42 711 participants or that put their health at risk, an open line  
43  
44 712 will be available 24 hours a day with direct communication to  
45  
46 713 the researcher in charge of monitoring the study to report any  
47  
48 714 event that requires hospitalization or immediate evaluation at  
49  
50 715 the hospital. All participants with adverse events that put  
51  
52 716 their life or health at risk may be urgently assessed by  
53  
54  
55  
56  
57  
58  
59  
60

1  
2  
3 717 personnel from both INCMNSZ and INR-LGII, if possible, by the  
4  
5 718 staff involved into the study. Patient follow-up investigator  
6  
7 719 will immediately contact the study administrator to disclose  
8  
9 720 the participant's assignment to treating physicians at that  
10  
11 721 institution, but the assignment will never be disclosed to  
12  
13 722 other investigators related to the study. All the study  
14  
15 723 expenses and/or attention of collateral effects will be covered  
16  
17 724 by the current cost of the financing SECTEI/061/2020.  
18  
19 725 Auditing will be carried out weekly, assessing adverse events,  
20  
21 726 capturing data in the corresponding datasheets by the study  
22  
23 727 administrator. Likewise, the data entered in the CASTOR web  
24  
25 728 base will be valued to validate its quality. The paper data  
26  
27 729 sheets must be kept in a special office dedicated to the study  
28  
29 730 in folders separated by volunteers with the informed consent  
30  
31 731 of each participant, the data of the medical history,  
32  
33 732 laboratory results, eligibility criteria, adverse event sheet  
34  
35 733 and results, molecular tests, as well as electrocardiogram.  
36  
37 734 The letter of revocation of informed consent will also be  
38  
39 735 protected if required. As part of the audit, an interim  
40  
41 736 analysis will be carried out 30 days after the study starts to  
42  
43 737 assess the possible adverse effects and whether these outweigh  
44  
45 738 the potential benefits of the intervention. In the adverse  
46  
47 739 event outweigh the potential benefits, termination of the study  
48  
49  
50  
51  
52  
53  
54  
55  
56  
57  
58  
59  
60



1  
2  
3 740 will be assessed. The approval of the research ethics committee  
4  
5 741 of the INR-LGII of Mexico has been obtained.  
6

7  
8 742

9  
10 743 **Statistical analysis**

11  
12 744 Data analysis will be carried out by intention to treat, which  
13  
14 745 means that each participant will be analysed according to the  
15  
16 746 group assigned regardless of whether they modified their  
17  
18 747 treatment. The study variables will be divided according to  
19  
20 748 the allocation group. The statistical analysis will be carried  
21  
22 749 out by evaluation the difference between the different groups  
23  
24 750 of HCQ plus BHH versus placebos. Missing data will be handled  
25  
26 751 by multiple imputation analysis when missing at random. Deaths  
27  
28 752 will be censored.  
29

30  
31  
32 753

33  
34 754 The primary objective will be expressed in number and  
35  
36 755 proportion for each group. The RR will be obtained as the  
37  
38 756 division between the proportion of primary outcomes in the  
39  
40 757 intervention group(s) by the proportion of primary outcomes in  
41  
42 758 the double placebo group. Adjusted risk ratios (aRR) will be  
43  
44 759 obtained using a log-binomial regression, adjusting for age  
45  
46 760 and gender as pre-specified confounding variables. It will be  
47  
48 761 expressed as RR with its respective 95% confidence interval  
49  
50 762 for the initial time, which is 60 days. Likewise, the result  
51  
52 763 will be expressed as absolute risk, which will be derived from  
53  
54  
55  
56  
57  
58  
59  
60

1  
2  
3 764 the proportion of the primary outcome in the intervention group  
4  
5 765 minus the proportion of the primary outcome in the control  
6  
7 766 group. Secondly, the primary objective will be analysed with  
8  
9 767 the non-parametric estimate of the survival and risk function  
10  
11 768 using Kaplan-Meier curves for 60 days according to the  
12  
13 769 allocation group. The primary endpoint will be SARS-CoV-2  
14  
15 770 infection within the 60-day period, and the silencing variable  
16  
17 771 will be dropping out of the study for any reason. The comparison  
18  
19 772 of the survival curves between both groups will be carried out  
20  
21 773 using the log-rank test. Risk ratio will be used for treatment  
22  
23 774 effect. A log-binomial regression adjusted by age, gender,  
24  
25 775 service in which the participant works, body mass index, will  
26  
27 776 be used.

28  
29  
30  
31  
32 777

33  
34  
35 778 For secondary outcomes such as the analysis at 90 days, the  
36  
37 779 same statistical analysis expressed in RR and absolute risk  
38  
39 780 will be used. Survival analysis will be used for the primary  
40  
41 781 endpoint only. An interim statistical analysis will be  
42  
43 782 performed 30 days after the study starts to assess possible  
44  
45 783 adverse effects and the efficacy of the intervention. The study  
46  
47 784 administrator will be the only one with access to the data.  
48  
49 785 For the interim analysis and the final analysis, the  
50  
51 786 administrator will export the data to Excel format to be  
52  
53  
54  
55  
56  
57  
58  
59  
60

1  
2  
3 787 analysed by the study statistician blinded to the assignment  
4  
5 788 of groups, participants, or results.  
6

7  
8 789

9  
10 790 **Adverse events, serious adverse events and suspected unexpected**  
11  
12 791 **serious adverse reactions**  
13

14 792 By requiring the use of drugs, the participant will be exposed  
15  
16 793 to risks inherent to the drug used, ranging from mild to severe  
17  
18 794 or death. Any unexpected risks that may occur during the study  
19  
20 795 will be immediately explained to the participants and the  
21  
22 796 ethics committee. Any adverse event will be compiled and will  
23  
24 797 not be disclosed under any condition to anyone other than the  
25  
26 798 study administrator, treating physicians in case of severe  
27  
28 799 events, and the ethics committee. The results will be  
29  
30 800 completely anonymous concerning the names of the participants.  
31  
32 801 The results will be compiled and reported as combined  
33  
34 802 collective data.  
35  
36  
37  
38

39 803

40  
41 804 *Patient and public involvement*  
42

43  
44 805 Patients were not involved in the development of this research.  
45  
46 806 However, the results of the study will be communicated to the  
47  
48 807 study participants by sending the end product (published  
49  
50 808 article) to the provided email address.  
51

52  
53 809

54  
55 810 **ETHICS, DISSEMINATION AND SAFETY MONITORING**  
56  
57  
58

1  
2  
3 811 In case of adverse events or complications derived from the  
4  
5 812 study, participants will be assured attention by the staff of  
6  
7 813 the INCMNSZ in an enclosure that ensures the safety of the  
8  
9 814 participant, not subjecting volunteers to a higher risk of  
10  
11 815 contamination. This care will be extended until adverse events  
12  
13 816 are resolved. In case of no adverse events during the study,  
14  
15 817 medical attention will be extended at the aforementioned  
16  
17 818 institute until 15 days after the end of the study.  
18  
19  
20  
21  
22

23 820 This protocol has been approved by the local medical ethical  
24  
25 821 review committee at the INR-LGII with the internal number  
26  
27 822 INRLGII/25/20, and by the Federal Commission for Protection  
28  
29 823 against Sanitary Risks (in Spanish, Comisión Federal para la  
30  
31 824 Protección contra Riesgos Sanitarios, COFEPRIS), approval  
32  
33 825 number 203300410A0058/2020.  
34  
35  
36

37 826 The study results will be published in journals of worldwide  
38  
39 827 impact affiliated with the Journal Citation Reports. Likewise,  
40  
41 828 the results of the study will be disseminated in national and  
42  
43 829 international media, exposed in international and national  
44  
45 830 congresses, communicated to CONACYT, and recorded in  
46  
47 831 Clinicaltrials.gov according to the study identifier number.  
48  
49 832 The help of non-profit organizations will be sought to  
50  
51 833 disseminate the results of the investigation to interest  
52  
53 834 groups.  
54  
55  
56  
57  
58  
59  
60

1  
2  
3 835  
4

5 836 The complete protocol will be published on Clinicaltrials.gov  
6  
7 837 and the OSF - Center for Open Science platform <https://osf.io/>.  
8  
9 838 Where a DOI will be assigned, and the amendments made to the  
10  
11  
12 839 original protocol will be assessed.  
13

14 840  
15

16 841 Amendments to the protocol may be made before the start of the  
17  
18 842 study and during the study. Any amendment to the protocol will  
19  
20  
21 843 be clarified and posted on Clinicaltrials.gov under the same  
22  
23 844 identifier as this study. Likewise, any amendment will be sent  
24  
25 845 to the ethics committee of the same hospital.  
26  
27

28 846  
29

30 847 **AUTHOR CONTRIBUTIONS**  
31

32 848 JGM is the lead study investigator, developed the study  
33  
34 849 concepts and design, and wrote the manuscript by adapting the  
35  
36  
37 850 original study protocol for publication, subsequent reviews  
38  
39 851 and amendments. EJHL, KMM and AAA contributed to the  
40  
41 852 development and refining of the protocol, writing of manuscript  
42  
43 853 and subsequent review. RJMP provided advanced methodological  
44  
45 854 and statistical input, and contributed to the study design and  
46  
47 855 subsequent amendments. RFC, TCH, PSSB, RAG and NML reviewed,  
48  
49 856 commented and informed methodology, development and writing of  
50  
51 857 the protocol.  
52  
53

54  
55 858  
56  
57  
58  
59  
60

1  
2  
3 **859 FUNDING STATEMENT**  
4

5 860 This work was supported by the Mexican Education, Science,  
6  
7 861 Technology and Innovation Department (in Spanish, Secretaría  
8  
9 862 de Educación, Ciencia, Tecnología e Innovación), grant number  
10  
11  
12 863 SECTEI/061/20.  
13

14 864  
15

16 **865 COMPETING INTERESTS STATEMENT**  
17

18 866 None of the authors have conflict of interests, commercial  
19  
20  
21 867 agreements, or receive financial fees or compensation from any  
22  
23 868 commercial or pharmaceutical company.  
24

25 869  
26

27  
28 **870 ETHICS APPROVAL**  
29

30 871 This protocol has been approved by the local medical ethical  
31  
32 872 review committee at the INR-LGII with the internal number  
33  
34 873 INRLGII/25/20. Definitions of Research Risk Regulation of the  
35  
36 874 General Health Law on Research for Health (in Spanish,  
37  
38 875 Reglamento de la Ley General de Salud en Materia de  
39  
40 876 Investigación para la Salud)  
41  
42 877 <http://www.inr.gob.mx/Descargas/Investigacion/Reglamentos->  
43  
44 878 [LGS-Materia-Investigacion-Salud.pdf](http://www.inr.gob.mx/Descargas/Investigacion/Reglamentos-LGS-Materia-Investigacion-Salud.pdf). ARTICLE 17; and by  
45  
46 879 Federal Commission for Protection against Sanitary Risks (in  
47  
48 880 Spanish, Comisión Federal para la Protección contra Riesgos  
49  
50 881 Sanitarios, COFEPRIS), approval number 203300410A0058/2020.  
51  
52

53 882  
54  
55  
56  
57  
58  
59  
60

1  
2  
3 883

4  
5 884 **PROVENANCE AND PEER REVIEW**

6  
7 885 Not commissioned; externally peer reviewed.

8  
9  
10 886

11  
12 887 **ORCID ID**

13  
14 888 Julio Granados-Montiel <https://orcid.org/0000-0002-0611-64>

15  
16 889

17  
18 890

19  
20 891

21  
22 892

23  
24 893

25  
26 894

27  
28 895

29  
30  
31  
32 896 **REFERENCES**

33  
34  
35 897 1 [Internet]. C.DM. COVID-19 Dashboard México. 2021 [cited  
36 898 2021 21/01/2021].

37  
38  
39 899 2 Pal M, Berhanu G, Desalegn C, *et al*. Severe Acute  
40 900 Respiratory Syndrome Coronavirus-2 (SARS-CoV-2): An  
41 901 Update. *Cureus* Published Online First: 2020.  
42 902 doi:10.7759/cureus.7423

43  
44 903 3 Lai C, Yu R, Wang M, *et al*. Shorter incubation period is  
45 904 associated with severe disease progression in patients  
46 905 with COVID-19. *Virulence* Published Online First: 2020.  
47 906 doi:10.1080/21505594.2020.1836894

- 1  
2  
3 907 4 Guan W, Ni Z, Hu Y, et al. Clinical Characteristics of  
4  
5 908 Coronavirus Disease 2019 in China. *N Engl J Med*  
6  
7 909 Published Online First: 2020. doi:10.1056/nejmoa2002032  
8  
9  
10 910 5 Li C, Ji F, Wang L, et al. Asymptomatic and Human-to-  
11  
12 911 Human Transmission of SARS-CoV-2 in a 2-Family Cluster,  
13  
14 912 Xuzhou, China. *Emerg Infect Dis* Published Online First:  
15  
16 913 2020. doi:10.3201/eid2607.200718  
17  
18  
19 914 6 Xu H, Zhong L, Deng J, et al. High expression of ACE2  
20  
21 915 receptor of 2019-nCoV on the epithelial cells of oral  
22  
23 916 mucosa. *Int J Oral Sci* Published Online First: 2020.  
24  
25 917 doi:10.1038/s41368-020-0074-x  
26  
27  
28 918 7 Levy A, Yagil Y, Bursztyn M, et al. ACE2 expression and  
29  
30 919 activity are enhanced during pregnancy. *Am J Physiol -*  
31  
32 920 *Regul Integr Comp Physiol* Published Online First: 2008.  
33  
34 921 doi:10.1152/ajpregu.90592.2008  
35  
36  
37 922 8 Baig AM, Khaleeq A, Ali U, et al. Evidence of the COVID-  
38  
39 923 19 Virus Targeting the CNS: Tissue Distribution, Host-  
40  
41 924 Virus Interaction, and Proposed Neurotropic Mechanisms.  
42  
43 925 ACS Chem. Neurosci. 2020.  
44  
45 926 doi:10.1021/acchemneuro.0c00122  
46  
47  
48 927 9 Zhan M, Qin Y, Xue X, et al. Death from Covid-19 of 23  
49  
50 928 Health Care Workers in China. *N Engl J Med* Published  
51  
52 929 Online First: 2020. doi:10.1056/nejmc2005696  
53  
54  
55 930 10 Wu Z, McGoogan JM. Characteristics of and Important  
56  
57  
58  
59  
60



- 1  
2  
3 931 Lessons From the Coronavirus Disease 2019 (COVID-19)  
4  
5 932 Outbreak in China. *JAMA* Published Online First: 2020.  
6  
7 933 doi:10.1001/jama.2020.2648  
8  
9  
10 934 11 Remuzzi A, Remuzzi G. COVID-19 and Italy: what next?  
11  
12 935 *Lancet*. 2020. doi:10.1016/S0140-6736(20)30627-9  
13  
14 936 12 Luzzi GA, Peto TEA. Adverse Effects of Antimalarials: An  
15  
16 937 Update. *Drug Saf*. 1993. doi:10.2165/00002018-199308040-  
17  
18 938 00004  
19  
20  
21 939 13 Wang LF, Lin YS, Huang NC, et al. Hydroxychloroquine-  
22  
23 940 inhibited dengue virus is associated with host defense  
24  
25 941 machinery. *J Interf Cytokine Res* 2015;**35**:143-56.  
26  
27 942 doi:10.1089/jir.2014.0038  
28  
29  
30 943 14 Gouda Kamel Helal, Magdy Abdelmawgoud Gad, Mohamed Fahmy  
31  
32 944 Abd-Ellah and MSE. Hydroxychloroquine Augments Early  
33  
34 945 Virological Response to Pegylated Interferon Plus  
35  
36 946 Ribavirin in Genotype-4 Chronic Hepatitis C Patients.  
37  
38 947 *Antivir Ther* 2006;**55**:52-5. doi:10.1002/jmv  
39  
40  
41 948 15 Wang M, Cao R, Zhang L, et al. Remdesivir and  
42  
43 949 chloroquine effectively inhibit the recently emerged  
44  
45 950 novel coronavirus (2019-nCoV) in vitro. *Cell Res*. 2020.  
46  
47 951 doi:10.1038/s41422-020-0282-0  
48  
49  
50 952 16 Gao J, Tian Z, Yang X. Breakthrough: Chloroquine  
51  
52 953 phosphate has shown apparent efficacy in treatment of  
53  
54 954 COVID-19 associated pneumonia in clinical studies.  
55  
56  
57  
58  
59  
60

- 1  
2  
3 955 Biosci. Trends. 2020. doi:10.5582/BST.2020.01047  
4  
5 956 17 Yao X, Ye F, Zhang M, et al. In Vitro Antiviral Activity  
6  
7 957 and Projection of Optimized Dosing Design of  
8  
9 958 Hydroxychloroquine for the Treatment of Severe Acute  
10  
11 959 Respiratory Syndrome Coronavirus 2 (SARS-CoV-2). *Clin*  
12  
13 960 *Infect Dis* Published Online First: 2020.  
14  
15 961 doi:10.1093/cid/ciaa237  
16  
17 962 18 Dutta D, Sharma M, Sharma R. Short-term  
18  
19 963 hydroxychloroquine in COVID-19 infection in people with  
20  
21 964 or without metabolic syndrome - clearing safety issues  
22  
23 965 and good clinical practice. *Eur. Endocrinol.* 2020.  
24  
25 966 doi:10.17925/ee.2020.16.2.109  
26  
27 967 19 Han H, Ma Q, Li C, et al. Profiling serum cytokines in  
28  
29 968 COVID-19 patients reveals IL-6 and IL-10 are disease  
30  
31 969 severity predictors. *Emerg Microbes Infect* Published  
32  
33 970 Online First: 2020. doi:10.1080/22221751.2020.1770129  
34  
35 971 20 Paiardini M, Müller-Trutwin M. HIV-associated chronic  
36  
37 972 immune activation. *Immunol Rev* Published Online First:  
38  
39 973 2013. doi:10.1111/imr.12079  
40  
41 974 21 Chude CI, Amaravadi RK. Targeting autophagy in cancer:  
42  
43 975 Update on clinical trials and novel inhibitors. *Int. J.*  
44  
45 976 *Mol. Sci.* 2017. doi:10.3390/ijms18061279  
46  
47 977 22 Geleris J, Sun Y, Platt J, et al. Observational Study of  
48  
49 978 Hydroxychloroquine in Hospitalized Patients with Covid-  
50  
51  
52  
53  
54  
55  
56  
57  
58  
59  
60

- 1  
2  
3 979 19. *N Engl J Med* 2020;**382**:2411-8.  
4  
5 980 doi:10.1056/nejmoa2012410  
6  
7 981 23 Zahr N, Urien S, Llopis B, *et al.* Pharmacokinetics and  
8  
9 982 pharmacodynamics of hydroxychloroquine in hospitalized  
10  
11 983 patients with COVID-19. *Therapies* Published Online  
12  
13 984 First: 2021. doi:10.1016/j.therap.2021.01.056  
14  
15 985 24 Chang R, Sun WZ. Repositioning chloroquine as antiviral  
16  
17 986 prophylaxis against COVID-19: potential and challenges.  
18  
19 987 *Drug Discov Today* 2020;**25**:1786-92.  
20  
21 988 doi:10.1016/j.drudis.2020.06.030  
22  
23 989 25 Juurlink DN. Safety considerations with chloroquine,  
24  
25 990 hydroxychloroquine and azithromycin in the management of  
26  
27 991 SARS-CoV-2 infection. *CMAJ*. 2020.  
28  
29 992 doi:10.1503/cmaj.200528  
30  
31 993 26 Zanasi A, Mazzolini M, Kantar A. A reappraisal of the  
32  
33 994 mucoactive activity and clinical efficacy of bromhexine.  
34  
35 995 *Multidiscip. Respir. Med.* 2017. doi:10.1186/s40248-017-  
36  
37 996 0088-1  
38  
39 997 27 Depfenhart M, de Villiers D, Lemperle G, *et al.*  
40  
41 998 Potential new treatment strategies for COVID-19: is  
42  
43 999 there a role for bromhexine as add-on therapy? *Intern.*  
44  
45 1000 *Emerg. Med.* 2020. doi:10.1007/s11739-020-02383-3  
46  
47 1001 28 Hoffmann M, Kleine-Weber H, Schroeder S, *et al.* SARS-  
48  
49 1002 CoV-2 Cell Entry Depends on ACE2 and TMPRSS2 and Is  
50  
51  
52  
53  
54  
55  
56  
57  
58  
59  
60

- 1  
2  
3 1003 Blocked by a Clinically Proven Protease Inhibitor. *Cell*  
4  
5 1004 Published Online First: 2020.  
6  
7 1005 doi:10.1016/j.cell.2020.02.052  
8  
9  
10 1006 29 Mareev VY, Orlova YA, Pavlikova EP, et al. Combination  
11  
12 1007 therapy at an early stage of the novel coronavirus  
13  
14 1008 infection (COVID-19). Case series and design of the  
15  
16 1009 clinical trial 'Bromhexine and Spironolactone for  
17  
18 1010 Coronavirus Infection requiring hospitalization  
19  
20  
21 1011 (BISCUIT)'. *Kardiologiya* Published Online First: 2020.  
22  
23 1012 doi:10.18087/cardio.2020.8.n1307  
24  
25 1013 30 Ravi N, Cortade DL, Ng E, et al. Diagnostics for SARS-  
26  
27 1014 CoV-2 detection: A comprehensive review of the FDA-EUA  
28  
29 1015 COVID-19 testing landscape. *Biosens Bioelectron*  
30  
31 1016 2020;**165**. doi:10.1016/j.bios.2020.112454  
32  
33  
34 1017  
35  
36  
37 1018  
38  
39  
40  
41  
42  
43  
44  
45  
46  
47  
48  
49  
50  
51  
52  
53  
54  
55  
56  
57  
58  
59  
60

SPIRIT 2013 Checklist: Recommended items to address in a clinical trial protocol and related documents\*

| Section/item                      | ItemNo | Description                                                                                                                                                                                                                                                                              | Page/Line            |
|-----------------------------------|--------|------------------------------------------------------------------------------------------------------------------------------------------------------------------------------------------------------------------------------------------------------------------------------------------|----------------------|
| <b>Administrative information</b> |        |                                                                                                                                                                                                                                                                                          |                      |
| Title                             | 1      | Descriptive title identifying the study design, population, interventions, and, if applicable, trial acronym                                                                                                                                                                             | 1/1-3                |
| Trial registration                | 2a     | Trial identifier and registry name. If not yet registered, name of intended registry                                                                                                                                                                                                     | 4/72                 |
|                                   | 2b     | All items from the World Health Organization Trial Registration Data Set                                                                                                                                                                                                                 | NA                   |
| Protocol version                  | 3      | Date and version identifier                                                                                                                                                                                                                                                              | 4/74                 |
| Funding                           | 4      | Sources and types of financial, material, and other support                                                                                                                                                                                                                              | 32/623625            |
| Roles and responsibilities        | 5a     | Names, affiliations, and roles of protocol contributors                                                                                                                                                                                                                                  | 1/5-17<br>31/614-620 |
|                                   | 5b     | Name and contact information for the trial sponsor                                                                                                                                                                                                                                       | 1/19-23              |
|                                   | 5c     | Role of study sponsor and funders, if any, in study design; collection, management, analysis, and interpretation of data; writing of the report; and the decision to submit the report for publication, including whether they will have ultimate authority over any of these activities | 31/614-620           |
|                                   | 5d     | Composition, roles, and responsibilities of the coordinating centre, steering committee, endpoint adjudication committee, data management team, and other individuals or groups overseeing the trial, if applicable (see Item 21a for data monitoring committee)                         | NA                   |
| <b>Introduction</b>               |        |                                                                                                                                                                                                                                                                                          |                      |
| Background and rationale          | 6a     | Description of research question and justification for undertaking the trial, including summary of relevant studies (published and unpublished) examining benefits and harms for each intervention                                                                                       | 6-9/98-187           |
|                                   | 6b     | Explanation for choice of comparators                                                                                                                                                                                                                                                    | 9/180-187            |
| Objectives                        | 7      | Specific objectives or hypotheses                                                                                                                                                                                                                                                        | 9/183-187            |
| Trial design                      | 8      | Description of trial design including type of trial (eg, parallel group, crossover, factorial, single group), allocation ratio, and framework (eg, superiority, equivalence, noninferiority, exploratory)                                                                                | 10/191-193           |

|                                                                       |     |                                                                                                                                                                                                                                                                                                                                                                                |               |
|-----------------------------------------------------------------------|-----|--------------------------------------------------------------------------------------------------------------------------------------------------------------------------------------------------------------------------------------------------------------------------------------------------------------------------------------------------------------------------------|---------------|
| <b>Methods:<br/>Participants,<br/>interventions,<br/>and outcomes</b> |     |                                                                                                                                                                                                                                                                                                                                                                                |               |
| Study setting                                                         | 9   | Description of study settings (eg, community clinic, academic hospital) and list of countries where data will be collected. Reference to where list of study sites can be obtained                                                                                                                                                                                             | 10/197-211    |
| Eligibility criteria                                                  | 10  | Inclusion and exclusion criteria for participants. If applicable, eligibility criteria for study centres and individuals who will perform the interventions (eg, surgeons, psychotherapists)                                                                                                                                                                                   | 11-12/212-248 |
| Interventions                                                         | 11a | Interventions for each group with sufficient detail to allow replication, including how and when they will be administered                                                                                                                                                                                                                                                     | 17/265-288    |
|                                                                       | 11b | Criteria for discontinuing or modifying allocated interventions for a given trial participant (eg, drug dose change in response to harms, participant request, or improving/worsening disease)                                                                                                                                                                                 | 17/278-281    |
|                                                                       | 11c | Strategies to improve adherence to intervention protocols, and any procedures for monitoring adherence (eg, drug tablet return, laboratory tests)                                                                                                                                                                                                                              | 17/269-274    |
|                                                                       | 11d | Relevant concomitant care and interventions that are permitted or prohibited during the trial                                                                                                                                                                                                                                                                                  | NA            |
| Outcomes                                                              | 12  | Primary, secondary, and other outcomes, including the specific measurement variable (eg, systolic blood pressure), analysis metric (eg, change from baseline, final value, time to event), method of aggregation (eg, median, proportion), and time point for each outcome. Explanation of the clinical relevance of chosen efficacy and harm outcomes is strongly recommended | 22-24/392-432 |
| Participant timeline                                                  | 13  | Time schedule of enrolment, interventions (including any run-ins and washouts), assessments, and visits for participants. A schematic diagram is highly recommended (see Figure)                                                                                                                                                                                               | 20-22/344-384 |
| Sample size                                                           | 14  | Estimated number of participants needed to achieve study objectives and how it was determined, including clinical and statistical assumptions supporting any sample size calculations                                                                                                                                                                                          | 16/253-260    |

|                                                                     |     |                                                                                                                                                                                                                                                                                                                                                                                                              |               |
|---------------------------------------------------------------------|-----|--------------------------------------------------------------------------------------------------------------------------------------------------------------------------------------------------------------------------------------------------------------------------------------------------------------------------------------------------------------------------------------------------------------|---------------|
| Recruitment                                                         | 15  | Strategies for achieving adequate participant enrolment to reach target sample size                                                                                                                                                                                                                                                                                                                          | 10-16/207-250 |
| <b>Methods: Assignment of interventions (for controlled trials)</b> |     |                                                                                                                                                                                                                                                                                                                                                                                                              |               |
| Allocation:                                                         |     |                                                                                                                                                                                                                                                                                                                                                                                                              |               |
| Sequence generation                                                 | 16a | Method of generating the allocation sequence (eg, computer-generated random numbers), and list of any factors for stratification. To reduce predictability of a random sequence, details of any planned restriction (eg, blocking) should be provided in a separate document that is unavailable to those who enrol participants or assign interventions                                                     | 18/291-295    |
| Allocation concealment mechanism                                    | 16b | Mechanism of implementing the allocation sequence (eg, central telephone; sequentially numbered, opaque, sealed envelopes), describing any steps to conceal the sequence until interventions are assigned                                                                                                                                                                                                    | 18-19/299-303 |
| Implementation                                                      | 16c | Who will generate the allocation sequence, who will enrol participants, and who will assign participants to interventions                                                                                                                                                                                                                                                                                    | 19/305-315    |
| Blinding (masking)                                                  | 17a | Who will be blinded after assignment to interventions (eg, trial participants, care providers, outcome assessors, data analysts), and how                                                                                                                                                                                                                                                                    | 19/307-315    |
|                                                                     | 17b | If blinded, circumstances under which unblinding is permissible, and procedure for revealing a participant's allocated intervention during the trial                                                                                                                                                                                                                                                         | NA            |
| <b>Methods: Data collection, management, and analysis</b>           |     |                                                                                                                                                                                                                                                                                                                                                                                                              |               |
| Data collection methods                                             | 18a | Plans for assessment and collection of outcome, baseline, and other trial data, including any related processes to promote data quality (eg, duplicate measurements, training of assessors) and a description of study instruments (eg, questionnaires, laboratory tests) along with their reliability and validity, if known. Reference to where data collection forms can be found, if not in the protocol | 27/504-510    |

|                                 |     |                                                                                                                                                                                                                                                                                                                                       |               |
|---------------------------------|-----|---------------------------------------------------------------------------------------------------------------------------------------------------------------------------------------------------------------------------------------------------------------------------------------------------------------------------------------|---------------|
|                                 | 18b | Plans to promote participant retention and complete follow-up, including list of any outcome data to be collected for participants who discontinue or deviate from intervention protocols                                                                                                                                             | NA            |
| Data management                 | 19  | Plans for data entry, coding, security, and storage, including any related processes to promote data quality (eg, double data entry; range checks for data values). Reference to where details of data management procedures can be found, if not in the protocol                                                                     | 27/508-513    |
| Statistical methods             | 20a | Statistical methods for analyzing primary and secondary outcomes. Reference to where other details of the statistical analysis plan can be found, if not in the protocol                                                                                                                                                              | 29/542-547    |
|                                 | 20b | Methods for any additional analyses (eg, subgroup and adjusted analyses)                                                                                                                                                                                                                                                              | 29/560-563    |
|                                 | 20c | Definition of analysis population relating to protocol non-adherence (eg, as randomized analysis), and any statistical methods to handle missing data (eg, multiple imputation)                                                                                                                                                       | 29/546-547    |
| <b>Methods: Monitoring</b>      |     |                                                                                                                                                                                                                                                                                                                                       |               |
| Data monitoring                 | 21a | Composition of data monitoring committee (DMC); summary of its role and reporting structure; statement of whether it is independent from the sponsor and competing interests; and reference to where further details about its charter can be found, if not in the protocol. Alternatively, an explanation of why a DMC is not needed | NA            |
|                                 | 21b | Description of any interim analyses and stopping guidelines, including who will have access to these interim results and make the final decision to terminate the trial                                                                                                                                                               | 30/567-571    |
| Harms                           | 22  | Plans for collecting, assessing, reporting, and managing solicited and spontaneously reported adverse events and other unintended effects of trial interventions or trial conduct                                                                                                                                                     | 30/575-581    |
| Auditing                        | 23  | Frequency and procedures for auditing trial conduct, if any, and whether the process will be independent from investigators and the sponsor                                                                                                                                                                                           | 28-29/529-539 |
| <b>Ethics and dissemination</b> |     |                                                                                                                                                                                                                                                                                                                                       |               |
| Research ethics approval        | 24  | Plans for seeking research ethics committee/institutional review board (REC/IRB) approval                                                                                                                                                                                                                                             | 31/589-599    |



|                          |     |                                                                                                                                                                                                                                  |            |
|--------------------------|-----|----------------------------------------------------------------------------------------------------------------------------------------------------------------------------------------------------------------------------------|------------|
| Protocol amendments      | 25  | Plans for communicating important protocol modifications (eg, changes to eligibility criteria, outcomes, analyses) to relevant parties (eg, investigators, REC/IRBs, trial participants, trial registries, journals, regulators) | 32/600-605 |
| Consent or assent        | 26a | Who will obtain informed consent or assent from potential trial participants or authorised surrogates, and how (see Item 32)                                                                                                     | 19/317-318 |
|                          | 26b | Additional consent provisions for collection and use of participant data and biological specimens in ancillary studies, if applicable                                                                                            | NA         |
| Confidentiality          | 27  | How personal information about potential and enrolled participants will be collected, shared, and maintained in order to protect confidentiality before, during, and after the trial                                             | 20/327-332 |
| Declaration of interests | 28  | Financial and other competing interests for principal investigators for the overall trial and each study site                                                                                                                    | 33/631-632 |
| Access to data           | 29  | Statement of who will have access to the final trial dataset, and disclosure of contractual agreements that limit such access for investigators                                                                                  | 28/510-513 |

# BMJ Open

## New prophylaxis regimen for SARS-CoV-2 infection in health professionals with low doses of Hydroxychloroquine and Bromhexine. A randomized, double-blind placebo clinical trial (ELEVATE Trial).

|                                 |                                                                                                                                                                                                                                                                                                                                                                                                                                                                                                                                                                                                                                                                                                                                                                                                                                                                                                                                                                                                                                                                                                                                                                                                                                                                                                                                                                                                          |
|---------------------------------|----------------------------------------------------------------------------------------------------------------------------------------------------------------------------------------------------------------------------------------------------------------------------------------------------------------------------------------------------------------------------------------------------------------------------------------------------------------------------------------------------------------------------------------------------------------------------------------------------------------------------------------------------------------------------------------------------------------------------------------------------------------------------------------------------------------------------------------------------------------------------------------------------------------------------------------------------------------------------------------------------------------------------------------------------------------------------------------------------------------------------------------------------------------------------------------------------------------------------------------------------------------------------------------------------------------------------------------------------------------------------------------------------------|
| Journal:                        | <i>BMJ Open</i>                                                                                                                                                                                                                                                                                                                                                                                                                                                                                                                                                                                                                                                                                                                                                                                                                                                                                                                                                                                                                                                                                                                                                                                                                                                                                                                                                                                          |
| Manuscript ID                   | bmjopen-2020-045190.R4                                                                                                                                                                                                                                                                                                                                                                                                                                                                                                                                                                                                                                                                                                                                                                                                                                                                                                                                                                                                                                                                                                                                                                                                                                                                                                                                                                                   |
| Article Type:                   | Protocol                                                                                                                                                                                                                                                                                                                                                                                                                                                                                                                                                                                                                                                                                                                                                                                                                                                                                                                                                                                                                                                                                                                                                                                                                                                                                                                                                                                                 |
| Date Submitted by the Author:   | 26-Jun-2021                                                                                                                                                                                                                                                                                                                                                                                                                                                                                                                                                                                                                                                                                                                                                                                                                                                                                                                                                                                                                                                                                                                                                                                                                                                                                                                                                                                              |
| Complete List of Authors:       | <p>GRANADOS-MONTIEL, JULIO; Instituto Nacional de Rehabilitacion Luis Guillermo Ibarra Ibarra, Tissue Engineering and Regenerative Medicine Unit</p> <p>Hazan-Lasri, Eric; Instituto Nacional de Rehabilitacion Luis Guillermo Ibarra Ibarra, Division of Traumatology, Emergencies and Bone Infections</p> <p>Franco-Cendejas, Rafael; Instituto Nacional de Rehabilitacion Luis Guillermo Ibarra Ibarra, Infectology Laboratory</p> <p>Chavez-Heres, Tatiana; Instituto Nacional de Rehabilitacion Luis Guillermo Ibarra Ibarra, Service, Hospital Epidemiological Surveillance Unit</p> <p>Silva-Bermudez, Phaedra; Instituto Nacional de Rehabilitacion Luis Guillermo Ibarra Ibarra, Tissue Engineering and Regenerative Medicine Unit</p> <p>Aguilar-Gaytan, Rocio; Instituto Nacional de Rehabilitacion Luis Guillermo Ibarra Ibarra, Tissue Engineering and Regenerative Medicine Unit</p> <p>Manzano-Leon, Natalia; Instituto Nacional de Cancerologia, Basic Division Research</p> <p>Méndez-Maldonado, Karla; Instituto Nacional de Rehabilitacion Luis Guillermo Ibarra Ibarra, Tissue Engineering and Regenerative Medicine Unit</p> <p>Alvarez-Arce, Alejandro; Instituto Nacional de Rehabilitación Luis Guillermo Ibarra Ibarra, Tissue Engineering and Regenerative Medicine Unit</p> <p>Martinez-Portilla, Raigam ; National Institute of Perinatology, Clinical research division</p> |
| <b>Primary Subject Heading</b>: | Health services research                                                                                                                                                                                                                                                                                                                                                                                                                                                                                                                                                                                                                                                                                                                                                                                                                                                                                                                                                                                                                                                                                                                                                                                                                                                                                                                                                                                 |
| Secondary Subject Heading:      | Evidence based practice, Global health, Medical publishing and peer review                                                                                                                                                                                                                                                                                                                                                                                                                                                                                                                                                                                                                                                                                                                                                                                                                                                                                                                                                                                                                                                                                                                                                                                                                                                                                                                               |
| Keywords:                       | INFECTIOUS DISEASES, PREVENTIVE MEDICINE, Clinical trials < THERAPEUTICS, COVID-19, CLINICAL PHARMACOLOGY                                                                                                                                                                                                                                                                                                                                                                                                                                                                                                                                                                                                                                                                                                                                                                                                                                                                                                                                                                                                                                                                                                                                                                                                                                                                                                |
|                                 |                                                                                                                                                                                                                                                                                                                                                                                                                                                                                                                                                                                                                                                                                                                                                                                                                                                                                                                                                                                                                                                                                                                                                                                                                                                                                                                                                                                                          |

1  
2  
3  
4  
5  
6  
7  
8  
9  
10  
11  
12  
13  
14  
15  
16  
17  
18  
19  
20  
21  
22  
23  
24  
25  
26  
27  
28  
29  
30  
31  
32  
33  
34  
35  
36  
37  
38  
39  
40  
41  
42  
43  
44  
45  
46  
47  
48  
49  
50  
51  
52  
53  
54  
55  
56  
57  
58  
59  
60





I, the Submitting Author has the right to grant and does grant on behalf of all authors of the Work (as defined in the below author licence), an exclusive licence and/or a non-exclusive licence for contributions from authors who are: i) UK Crown employees; ii) where BMJ has agreed a CC-BY licence shall apply, and/or iii) in accordance with the terms applicable for US Federal Government officers or employees acting as part of their official duties; on a worldwide, perpetual, irrevocable, royalty-free basis to BMJ Publishing Group Ltd ("BMJ") its licensees and where the relevant Journal is co-owned by BMJ to the co-owners of the Journal, to publish the Work in this journal and any other BMJ products and to exploit all rights, as set out in our [licence](#).

The Submitting Author accepts and understands that any supply made under these terms is made by BMJ to the Submitting Author unless you are acting as an employee on behalf of your employer or a postgraduate student of an affiliated institution which is paying any applicable article publishing charge ("APC") for Open Access articles. Where the Submitting Author wishes to make the Work available on an Open Access basis (and intends to pay the relevant APC), the terms of reuse of such Open Access shall be governed by a Creative Commons licence – details of these licences and which [Creative Commons](#) licence will apply to this Work are set out in our licence referred to above.

Other than as permitted in any relevant BMJ Author's Self Archiving Policies, I confirm this Work has not been accepted for publication elsewhere, is not being considered for publication elsewhere and does not duplicate material already published. I confirm all authors consent to publication of this Work and authorise the granting of this licence.

1  
2  
3  
4 1 **New prophylaxis regimen for SARS-CoV-2 infection in health professionals with low doses**  
5  
6  
7 2 **of Hydroxychloroquine and Bromhexine: a randomized, double-blind placebo clinical trial**  
8  
9  
10 3 **(ELEVATE Trial).**  
11  
12  
13  
14 4

15  
16  
17 5 Julio Granados-Montiel<sup>1\*</sup>, Eric Joseph Hazan Lasri<sup>2</sup>, Rafael Franco Cendejas<sup>3</sup>, Tatiana  
18  
19  
20 6 Chávez Heres<sup>4</sup>, Phaedra Suriel Silva Bermúdez<sup>1</sup>, Rocío Aguilar Gaytán<sup>1</sup>, Natalia Manzano-  
21  
22  
23 7 León<sup>5</sup>, Karla Méndez-Maldonado<sup>1</sup>, Alejandro Alvarez-Arce<sup>1</sup>, Raigam J. Martinez-Portilla<sup>6</sup>.  
24  
25  
26  
27 8

28  
29  
30 9 <sup>1</sup> Tissue Engineering and Regenerative Medicine Unit. National Institute of Rehabilitation.  
31  
32  
33  
34 10 Mexico City, Mexico.

35  
36  
37 11 <sup>2</sup> Division of Traumatology, Emergencies and Bone Infections. National Institute of  
38  
39  
40 12 Rehabilitation. Mexico City, Mexico.

41  
42  
43 13 <sup>3</sup> Infectology Laboratory. National Institute of Rehabilitation. Mexico City, Mexico.

44  
45  
46  
47 14 <sup>4</sup> Service, Hospital Epidemiological Surveillance Unit. National Institute of Rehabilitation.  
48  
49  
50 15 Mexico City, Mexico.

51  
52  
53 16 <sup>5</sup> Basic Division Research, National Institute of Cancerology. Mexico City, Mexico.  
54  
55  
56  
57  
58  
59  
60

1  
2  
3 17 <sup>6</sup>Clinical research division. National Institute of Perinatology  
4  
5

6  
7 18  
8  
9

10 19 \*Corresponding author  
11  
12

13 20 Julio Granados-Montiel. M.D.& Ph.D.  
14  
15

16  
17 21 Tissue Engineering and Regenerative Medicine Unit. National Institute of Rehabilitation  
18  
19

20 22 Av. México-Xochimilco 289. Col. Arenal de Guadalupe, Tlalpan. 14389, Mexico City,  
21  
22

23 23 Mexico.  
24  
25

26  
27 24 ORCID ID: 0000-0002-0611-6421  
28  
29

30 25 juliogram@gmail.com  
31  
32

33  
34 26  
35  
36

37 27 Keywords: prophylaxis, SARS-CoV-2, COVID-19, health workers, hydroxychloroquine,  
38  
39

40 28 bromhexine.  
41  
42

43  
44 29  
45  
46

47 30  
48  
49

50 31 Word count: 6174  
51  
52

53  
54 32  
55  
56  
57  
58  
59  
60

1  
2  
3  
4 33  
5  
6  
7 34  
8  
9  
10 35  
11  
12  
13  
14 36  
15  
16  
17 37  
18  
19  
20 38  
21  
22  
23  
24 39  
25  
26  
27 40  
28  
29  
30 41  
31  
32  
33  
34 42  
35  
36  
37 43  
38  
39  
40  
41 44  
42  
43  
44 45  
45  
46  
47 46  
48  
49  
50 47  
51  
52  
53  
54  
55  
56  
57  
58  
59  
60

**ABSTRACT**

For peer review only

1  
2  
3  
4 48 **Introduction:** SARS-CoV-2 infection in Mexico has caused ~2.5 million confirmed cases;  
5  
6  
7 49 around 20-25% of health workers will be infected by the virus at their workplace, with  
8  
9  
10 50 approximately 4.4% of mortality. High infectivity of SARS-CoV-2 is related with cell entry  
11  
12  
13 51 mechanism, through the angiotensin-converting enzyme (ACE) receptor. SARS-CoV-2  
14  
15  
16  
17 52 requires transmembrane protease serine 2 (TMPRSS2) to cleave its spike glycoprotein and  
18  
19  
20 53 ensure fusion of host cell and virus membrane. We propose studying prophylactic treatment  
21  
22  
23  
24 54 with hydroxychloroquine (HCQ) and bromhexine (BHH), which have been shown to be  
25  
26  
27 55 effective in preventing SARS-CoV-2 infection progression when administered in early  
28  
29  
30 56 stages. The aim of this study is to assess the efficacy of HCQ and BHH as prophylactic  
31  
32  
33  
34 57 treatments for SARS-CoV-2 infection in healthy health workers exposed to the virus.

35  
36  
37 58 **Methods and analysis:** Double-blind randomized clinical trial, with parallel allocation at a  
38  
39  
40 59 1:1 ratio with placebo, of low doses of HCQ plus BHH, for 60 days. Study groups will be  
41  
42  
43  
44 60 defined as follows: 1) HCQ 200mg/d + BHH 8mg/8h vs 2) HCQ placebo plus BHH placebo.  
45  
46  
47 61 Primary endpoint will be efficacy of both interventions for the prevention of SARS-CoV-2  
48  
49  
50 62 infection, determined by the risk ratio (RR) of infected personnel and the absolute risk. At  
51  
52  
53  
54 63 least a 16% reduction in absolute risk is expected between the intervention and placebo  
55  
56  
57  
58  
59  
60



1  
2  
3 64 groups; a minimum of 20% infection is expected in the placebo group. The sample size

4  
5  
6  
7 65 calculation estimated a total of 214 patients assigned: two groups of 107 participants each.

8  
9  
10 66 **Ethics and dissemination:** This protocol has been approved by the local Medical Ethics

11  
12  
13 67 Committee (National Institute of Rehabilitation ‘Luis Guillermo Ibarra Ibarra’, approval

14  
15  
16 68 number INRLGII/25/20) and by the Federal Commission for Protection against Sanitary

17  
18  
19 69 Risks (COFEPRIS, approval number 203300410A0058/2020). The results of the study will

20  
21  
22 70 be submitted for publication in peer-reviewed journals and disseminated through

23  
24  
25 71 conferences.

26  
27  
28 72 **Trial registration number 2a:** NCT04340349.

29  
30  
31 73 2b: NA

32  
33  
34 74 Protocol version: #4

35  
36  
37 75

38  
39  
40 76 **STRENGTHS AND LIMITATIONS OF THIS STUDY**

41  
42  
43 77 *Strengths*

44  
45  
46 78 ► This is a double-blind randomized single-centre clinical trial, involving low doses of

47  
48  
49 79 hydroxychloroquine and bromhexine, adequately powered to provide clinically

1  
2  
3 80 relevant information regarding prophylactic treatment for SARS-CoV-2 infection in

4  
5  
6  
7 81 health care personnel.

8  
9  
10 82 ► Bromhexine has minimal side effects and is commercially available worldwide so,

11  
12  
13 83 positive results could be applied in a timely fashion in different regions.

14  
15  
16  
17 84

18  
19  
20 85 *Limitations*

21  
22  
23 86 ► Long-term use of hydroxychloroquine can cause heart rhythm problems

24  
25  
26  
27 87 ► For the moment, people who are not candidates to receive the vaccine, due severe

28  
29  
30 88 allergies, will not be included.

31  
32  
33 89 ► Hydroxychloroquine has not been shown to be effective in monotherapy or with

34  
35  
36  
37 90 azithromycin, but adjunctive BHH could be an effective combination to inhibit

38  
39  
40 91 SARS-Cov-2 infection.

41  
42  
43  
44  
45 92 **INTRODUCTION**

46  
47  
48 93 In Mexico, up to June 2021, have been produced more than 2.5 millions confirmed cases and

49  
50  
51 94 ~232,000 deaths have arisen[1]. The age group ranging between 30 and 79 years is the most

1  
2  
3  
4 95 highly affected, where 81% present mild symptoms, 14% severe and 5% critical, requiring  
5  
6  
7 96 intensive care unit management.  
8  
9

10 97 SARS-CoV-2 is a single-stranded RNA virion, member of the *Betacoronavirus* genus [2].  
11  
12

13 98 SARS-CoV-2 has an incubation period between 3 to 10 days, with different incubation  
14  
15

16  
17 99 periods related with different clinical symptoms [3,4] . It is transmitted through respiratory  
18  
19

20 100 droplets from infected humans and through contact with contaminated fomites and aerosols;  
21  
22

23 101 moreover, even asymptomatic persons in close contact can transmit the disease [5]. The  
24  
25

26  
27 102 mechanism through which the virus infects the respiratory cell is due to the angiotensin-  
28  
29

30 103 converting enzyme protein 2 (ACE-2) receptor. This receptor is found in multiple tissues  
31  
32

33 104 such as the oral cavity, brain, kidneys, gut, and placenta [6–8].  
34  
35

36  
37 105 Health personnel is not exempt from contracting the disease. In China, it was reported that  
38  
39

40 106 3.5-4.4% of the infected population belonged to this group, and 14.8% presented  
41  
42

43 107 characteristics of severity or critical illness [4,9,10]. Italy, around 20% of healthcare  
44  
45

46  
47 108 professionals became infected [11]; mean age of health workers who died was 55 years  
48  
49

50 109 (range of 29-72 years) and mean period from hospital admission to death was 19 days, (range  
51  
52

53  
54 110 1-47 days) [9].  
55  
56  
57  
58  
59  
60

1  
2  
3  
4 111 Treatment of the SARS-Cov-2 infection has led different research groups to work on the  
5  
6  
7 112 development of vaccines. However, the use of vaccines can be a challenge. The first trials  
8  
9  
10 113 have shown that the immune protection is not 100% and protection may wane over time so  
11  
12  
13 114 periodic vaccination or booster shots for new variants may be needed . On the other hand,  
14  
15  
16 115 because the virus is RNA and the mutation rate is high, we can expect new variants that  
17  
18  
19  
20 116 reduce or nullify the effectiveness of the vaccines, this depends on the origin of vaccine, if it  
21  
22  
23 117 is made with viral vectors (such as from CanSino or AstraZeneca), if it is mRNA (such as  
24  
25  
26 118 from Moderna or Pfizer-BioNTech) or if it is inactivated virus (Sinovac). Mainly because the  
27  
28  
29  
30 119 development of vaccine that can be efficient for the new variants could be delayed and this  
31  
32  
33 120 could once again increase the number of people who acquire the SARS-CoV-2 virus. On the  
34  
35  
36  
37 121 other hand, around the world there are groups of people who are against vaccination, or  
38  
39  
40 122 people that have severe allergies, as well as populations that will take much longer to reach  
41  
42  
43 123 the moment when they can acquire the vaccine, so it is extremely necessary that people who  
44  
45  
46 124 do not vaccinate by choice, by disease or by the lack of the vaccine, have an alternative to  
47  
48  
49  
50 125 avoid infection and avoid the spread of the virus.  
51  
52  
53  
54  
55  
56  
57  
58  
59  
60

1  
2  
3 126 Therefore, it is important to develop a pharmacological strategy that allows the use of  
4  
5  
6  
7 127 prophylactic drugs for the prevention of SARS-CoV-2 infection.  
8  
9

10 128 Chloroquine (CQ) and Hydroxychloroquine (HCQ) are known as an antimalarial agent; HCQ  
11  
12  
13 129 is a hydroxylated derivative from CQ. CQ and HCQ have gained attention as possible  
14  
15  
16  
17 130 therapies in Covid-19 disease. In overdose, both drugs can cause severe, potentially life-  
18  
19  
20 131 threatening effects as visual disturbances, corneal opacities, irreversible retinopathy can  
21  
22  
23  
24 132 occur with cumulative doses exceeding 100 grams. When lower daily doses (250 mg are  
25  
26  
27 133 used) retinopathy may not occur after many years of treatment [12]. The above indicates that  
28  
29  
30 134 the use of HCQ at low doses to avoid SARS-CoV-2 infection, has a low possibility of being  
31  
32  
33  
34 135 toxic and could be used as a prophylactic treatment. HCQ has been used in several viral  
35  
36  
37 136 infections, for example, as replication inhibitor for the dengue virus, decreasing in vitro virus  
38  
39  
40 137 infection and promoting activation of different immunological signal pathways [13]. It has  
41  
42  
43  
44 138 also been used to treat patients infected with hepatitis C virus decreasing viral load, with  
45  
46  
47 139 minimal adverse effects reported [14]. HCQ has been reported to block viral infection by  
48  
49  
50 140 increasing the endosomal pH required for virus fusion to the cell, as well as interfering with  
51  
52  
53  
54 141 cellular SARS-CoV-2 cell receptors, through inhibition of receptor glycosylation by ACE2  
55  
56  
57  
58  
59  
60

1  
2  
3  
4 142 [15–18]. HCQ has immunomodulatory effects; it inhibits production and release of pro-  
5  
6  
7 143 inflammatory cytokines, that are associated with severe disease development [19,20] .  
8  
9  
10 144 Recently, it has been reported that HCQ works as a autophagy inhibitor, interfering with viral  
11  
12  
13 145 infection and replication [21]. There is recent evidence that HCQ could be used to treat  
14  
15  
16 146 COVID-19; studies in high-risk patients show that the use of HCQ was associated with a  
17  
18  
19  
20 147 lower risk of intubation or death [22]. Recent study showed that pre-treatment with HCQ has  
21  
22  
23 148 shown a better effect on antiviral activity [17] and it has been reported that loading doses of  
24  
25  
26 149 1600 mg HCQ followed by 600 mg daily doses are needed have a relevant effect to SARS-  
27  
28  
29  
30 150 CoV-2 inhibition within 72 hours in 60% of COVID-19 patients [23]. Finally, a study where  
31  
32  
33 151 evaluated the antiviral mechanisms of CQ and the adverse effects, repositioned the CQ to  
34  
35  
36 152 have more efficacy when used as a prophylactic treatment rather than as a therapeutic [24].  
37  
38  
39  
40 153 On the other hand, CQ and HCQ has been reported to have various adverse effects, the CQ  
41  
42  
43 154 being the most toxic in overdose. However, it was recently published that *in vivo* trials are  
44  
45  
46 155 lacking to determine whether this drug is useful as a prophylactic treatment against SARS-  
47  
48  
49  
50 156 Cov-2 [25]. Based on the above, do more studies will be important to determine its  
51  
52  
53 157 effectiveness at low doses (<250 mg) as a prophylactic treatment.  
54  
55  
56  
57  
58  
59  
60

1  
2  
3  
4 158 Another pharmacological option to treat SARS-CoV-2 infection is Bromhexine (BHH). BHH  
5  
6  
7 159 modifies the composition of mucus, increases ciliary clearance and decreases coughing,  
8  
9  
10 160 improving respiratory symptoms. It has also been reported to enhance the effects of some  
11  
12  
13 161 antibiotics [26]. The mechanism by which SARS-CoV-2 enters human cells depends on the  
14  
15  
16 162 ACE-2 receptor and the human transmembrane serine protease (TMPRSS2), on which BHH  
17  
18  
19  
20 163 has a specific inhibitory effect [27,28]. BHH has been used to treat pneumonic damage in  
21  
22  
23 164 both lungs during early infection [29]. BHH turns out to be an ideal candidate for SARS-  
24  
25  
26 165 CoV-2 treatment, since it has few contraindications, and its side effects are minimal,  
27  
28  
29  
30 166 demonstrating an extensive margin of pharmacological safety. BHH is widely available over  
31  
32  
33 167 the counter, and its low cost makes it an ideal therapeutic option.  
34  
35  
36  
37 168 According to a letter published in the New England Journal of Medicine, of 77,262 patients  
38  
39  
40 169 infected by SARS-CoV-2, 3387 (4.4%) were health workers [9]. Of these, 23 have died from  
41  
42  
43 170 this disease. The prevalence of infections in health personnel is alarming since health services  
44  
45  
46  
47 171 in first world countries have been overwhelmed by this disease. In Italy, around 20% of health  
48  
49  
50 172 professionals had a SARS-CoV-2 infection [11]. Faced with a highly contagious disease, the  
51  
52  
53 173 care of health workers, who are first line of contact and on whom the health system of each  
54  
55  
56  
57  
58  
59  
60

1  
2  
3  
4 174 country depends, is essential. This research regarding the use of HCQ and BHH in health  
5  
6  
7 175 personnel will allow us to determine and compare the effectiveness of both interventions,  
8  
9  
10 176 which is of vital importance to clarify whether these treatments may prevent the appearance  
11  
12  
13 177 of infection in this population. Describing for the first time that HCQ plus BHH could  
14  
15  
16 178 function for disease prevention, would allow us to provide prophylaxis to health  
17  
18  
19  
20 179 professionals worldwide. Therefore, the use of HCQ and BHH in healthy health personnel  
21  
22  
23 180 exposed to patients with confirmed or suspected SARS-CoV-2 will significantly reduce  
24  
25  
26  
27 181 infection.



1  
2  
3  
4 182 **METHODS AND ANALYSIS**  
5  
6

7 183 **Study design**  
8  
9

10 184 Double-blind randomized clinical trial, with parallel allocation at a 1:1 ratio with HCQ +  
11  
12  
13 185 BHH vs placebo for both drugs for 60 days, to determine the efficacy of the combined drugs  
14  
15  
16  
17 186 for the prevention of SARS-CoV-2 infection in healthcare workers.  
18  
19

20 187  
21  
22

23 188 **Participants**  
24  
25  
26

27 189 The study will be carried out at the “Instituto Nacional de Rehabilitación, Luis Guillermo  
28  
29  
30 190 Ibarra Ibarra” (INR-LGII). This institution is a tertiary hospital that at this time has not been  
31  
32  
33 191 designated as a COVID-19 centre. The Mexican government defined 3 phases to determine  
34  
35  
36  
37 192 risk for SARS-CoV-2 infection: imported cases from outside Mexico; community infection  
38  
39  
40 193 and spread of the disease throughout the country (also known as Phase 3). In the latter, it is  
41  
42  
43  
44 194 assumed that every person who enters a hospital is a potentially infected carrier; currently  
45  
46  
47 195 our centre is in Phase 3. Likewise, health personnel who work at the “Instituto Nacional de  
48  
49  
50 196 Ciencias Médicas y Nutrición, Salvador Zubirán” (INCMNSZ), which is a COVID-19  
51  
52  
53  
54  
55  
56  
57  
58  
59  
60

1  
2  
3  
4 197 designated tertiary centre, and who meet inclusion criteria of the protocol will be invited to  
5  
6  
7 198 participate in the study.  
8  
9

10 199 Inclusion of participants will be assessed according to the eligibility criteria. Table 1 shows  
11  
12  
13 200 the classification and characteristics of study variables. Continuous variables will be assessed  
14  
15  
16  
17 201 for normality. Variables with a normal distribution will be compared using Student's t-test,  
18  
19  
20 202 non-parametric variables using the Mann-Whitney U-test. Categorical variables will be  
21  
22  
23 203 evaluated using the Chi-squared test.  
24  
25  
26  
27 204

28  
29  
30 205 *Inclusion criteria*  
31  
32

33 206 ▶ Health personnel working at INR LGII or INCMNSZ who wish to participate in the  
34  
35  
36  
37 207 study and sign the informed consent.  
38  
39

40 208 ▶ Over 18 and under 60 years of age, both genders.  
41  
42

43 209 ▶ Contacting with suspected or confirmed SARS-CoV-2 infection.  
44  
45  
46

47 210 ▶ Normal electrocardiogram.  
48  
49

50 211 *Exclusion criteria*  
51  
52  
53  
54  
55  
56  
57  
58  
59  
60

- 1  
2  
3  
4 212 ▶ Positive quantitative reverse transcriptase-polymerase chain reaction (qRT-PCR) test  
5  
6  
7 213 for SARS-CoV-2 at the time of inclusion.  
8  
9  
10 214 ▶ Panel of IgG or IgM antibodies positive for SARS-CoV-2 at the time of inclusion.  
11  
12  
13 215 ▶ Development of respiratory symptoms suspicious of SARS-CoV-2 infection during  
14  
15  
16 216 the first 7 days after treatment is initiated, confirmed by qRT-PCR and IgG or IgM  
17  
18  
19 217 antibodies positive for SARS-CoV-2.  
20  
21  
22  
23 218 ▶ History of allergies to any hydroxychloroquine or bromhexine related compound or  
24  
25  
26 219 medication.  
27  
28  
29  
30 220 ▶ Use of immunosuppressors for any reason.  
31  
32  
33 221 ▶ History of bone marrow transplant.  
34  
35  
36 222 ▶ Known glucose-6-phosphate dehydrogenase deficiency.  
37  
38  
39 223 ▶ Chronic kidney disease or glomerular filtration <20ml/min.  
40  
41  
42  
43 224 ▶ Use of other drugs with reported pharmacological interactions (i.e., digitalis,  
44  
45  
46 225 flecainide, amiodarone, procainamide, or propafenone).  
47  
48  
49  
50 226 ▶ History of long QT syndrome.  
51  
52  
53 227 ▶ Electrocardiogram with QTc>500 msec.  
54  
55  
56  
57  
58  
59  
60

228 ▶ Pregnant or breastfeeding personnel.

229 ▶ Epilepsy.

230 ▶ Known liver disease.

231 ▶ Personnel who have received the Covid-19 vaccine

232 *Elimination criteria*

233 ▶ Personnel who decide to leave the study for any reason not related to adverse events.

234 ▶ Personnel with incomplete information on the primary outcome (qRT-PCR for  
235 SARS-CoV-2).

236 ▶ Personnel who are relocated to work in another institution.

237 ▶ Personnel who do not wish to participate in the study

238

239 **Table 1.** Classification and characteristics of study variables.

| Variable | Conceptual definition                                         | Operational definition | Type                       |
|----------|---------------------------------------------------------------|------------------------|----------------------------|
| Age      | Date at recruitment minus date of birth                       | Years of age           | Quantitative               |
| Gender   | Male or female genotype of the person                         | Male/female            | Qualitative<br>nominal     |
| Weight   | How much the patient weighs at the<br>time of study inclusion | Weight, kilograms      | Continuous<br>quantitative |

|                 |                                                                                     |                                                                                                                                 |                         |
|-----------------|-------------------------------------------------------------------------------------|---------------------------------------------------------------------------------------------------------------------------------|-------------------------|
| Size            | How tall is the patient from head to toe at the time of study inclusion             | Height, centimetres                                                                                                             | Continuous quantitative |
| Body mass index | The division between weight by height squared at the time of inclusion in the study | Units of Kg/cm <sup>2</sup>                                                                                                     | Continuous quantitative |
| Occupation      | Remunerative work performed by the participant at the time of recruitment           | Unemployed, informal, unskilled employee, micro-entrepreneur or saleswoman, administrative employee, professional, entrepreneur | Qualitative nominal     |
| Civil status    | Civil status of the individual                                                      | Married, single, widowed, divorced, common-law union                                                                            | Qualitative nominal     |
| Level of study  | Years completed and approved at the time of study recruitment                       | No studies, primary, secondary, preparatory, technical career, undergraduate, postgraduate                                      | Ordinal qualitative     |
| Alcohol intake  | Consumption of alcoholic beverages                                                  | Intake of alcoholic beverages                                                                                                   | Qualitative nominal     |
| Smoking habit   | Habitual tobacco uses at the time of recruitment                                    | Number of packs of cigarettes consumed per day.                                                                                 | Quantitative            |

|                      |                                                                                                                                                               |                      |                     |
|----------------------|---------------------------------------------------------------------------------------------------------------------------------------------------------------|----------------------|---------------------|
| Drug's use           | Regular use of chemicals such as amphetamines, cocaine, marijuana, LSD, heroin, glass                                                                         | Consumption of drugs | Qualitative nominal |
| Hypertension         | Elevation of blood pressure >130/80                                                                                                                           | Positive/negative    | Qualitative nominal |
| Asthma               | Chronic inflammatory disease characterized by bronchial hyperactivity with recurrent episodes of bronchospasm                                                 | Positive/negative    | Qualitative nominal |
| Diabetes             | Group of metabolic diseases, which occurs when the pancreas does not produce enough insulin or when the body does not use the insulin it produces effectively | Positive/negative    | Qualitative nominal |
| Obesity              | Pathological state characterized by a general excess or excessive accumulation of fat in the body                                                             | Positive/negative    | Qualitative nominal |
| SARS-CoV-2 pneumonia | A form of severe pneumonia caused by coronavirus                                                                                                              | Positive/negative    | Qualitative nominal |
| Death                | Statistical term that describes the death of an individual                                                                                                    | Positive/negative    | Qualitative nominal |
| Intensive Care Unit  | Special facility in a hospital area, which provides life support to critically ill patients, requiring intensive supervision and monitoring                   | Positive/negative    | Qualitative nominal |

|                      |                                                                                                                                                                                                                                                                                                                                                                                                                                                                                                                                           |                   |                     |
|----------------------|-------------------------------------------------------------------------------------------------------------------------------------------------------------------------------------------------------------------------------------------------------------------------------------------------------------------------------------------------------------------------------------------------------------------------------------------------------------------------------------------------------------------------------------------|-------------------|---------------------|
| Severe pneumonia     | Defined by the American Thoracic Society Criteria requiring at least one main criterion (need for invasive mechanical ventilation and shock with need for vasopressors), or three minor criteria (respiratory rate > 30 bpm, PaO <sub>2</sub> / FiO <sub>2</sub> ratio <250, Infiltrates multilobars, confusion / disorientation, uremia [BUN > 20 mg / dL], leukopenia [<4,000], thrombocytopenia [<100,000 platelets / mm <sup>3</sup> ], hypothermia [core temperature <36°C], or hypotension requiring aggressive fluid resuscitation | Positive/negative | Qualitative nominal |
| Pneumonia            | Acute infection of the lung parenchyma, accompanied by bilateral infiltrates on chest X-ray                                                                                                                                                                                                                                                                                                                                                                                                                                               | Positive/negative | Qualitative nominal |
| Confusion            | Glasgow scale less than 15                                                                                                                                                                                                                                                                                                                                                                                                                                                                                                                | Positive/negative | Qualitative nominal |
| Hypothermia          | Body temperature less than 36 degrees Celsius                                                                                                                                                                                                                                                                                                                                                                                                                                                                                             | Positive/negative | Qualitative nominal |
| Thrombocytopenia     | Total platelets less than 100,000 per mm <sup>3</sup> .                                                                                                                                                                                                                                                                                                                                                                                                                                                                                   | Positive/negative | Qualitative nominal |
| Arterial hypotension | Systolic blood pressure less than 90 mmHg or mean arterial pressure less than 60 mmHg                                                                                                                                                                                                                                                                                                                                                                                                                                                     | Positive/negative | Qualitative nominal |

|                                                         |                                                                                                                                                                                                       |                   |                     |
|---------------------------------------------------------|-------------------------------------------------------------------------------------------------------------------------------------------------------------------------------------------------------|-------------------|---------------------|
| Sepsis                                                  | Rapid SOFA score (qSOFA) with 2 of the following three clinical variables: Glasgow $\leq 13$ , systolic pressure $\leq 100$ mm Hg, or respiratory rate $\geq 22$ bpm                                  | Positive/negative | Qualitative nominal |
| qRT-PCR for SARS-CoV-2                                  | Molecular diagnosis for SARS-CoV-2 from viral RNA                                                                                                                                                     | Positive/negative | Qualitative nominal |
| Septic shock                                            | Arterial hypotension that persists after resuscitation volume and that requires vasopressors to maintain MAP $\geq 65$ mm Hg and lactate $\geq 2$ mmol / L (18 mg / dL) in the absence of hypovolemia | Positive/negative | Qualitative nominal |
| Adverse events related to the use of Hydroxychloroquine | Indirect drug-related mortality, nausea, vomiting, abdominal pain, rash, itchy skin, hair loss, QT segment elongation on electrocardiogram, corneal opacity, cardiac arrhythmias, and heart failure   | Positive/negative | Qualitative nominal |
| Adverse events related to the use of Bromhexine         | Indirect drug-related mortality, nausea, vomiting, abdominal pain, rash, diarrhoea.                                                                                                                   | Positive/negative | Qualitative nominal |

240

241 **Sample size calculation**

242 According to the study by Remuzzi A et al. [11], the proportion of healthcare workers

243 infected with SARS-CoV-2 and confirmed by RT-PCR was 20%. Taking this 20% as our



1  
2  
3 244 null hypothesis, we estimate that the proportion of infections in the intervention group will  
4  
5  
6  
7 245 be 4%. Using a two-tailed test, with a type I error of 0.05, a power of 90%, and taking into  
8  
9  
10 246 account a loss of 10% of participants for each group, we estimate that a total of 214  
11  
12  
13 247 participants will be required, distributed in parallel groups (1:1) of 107 each. This number of  
14  
15  
16  
17 248 volunteers will allow us to find a difference of 16% between groups with a power of 90%  
18  
19  
20 249 and an attrition of 20%. To ensure that desired simple size is reached, all health workers  
21  
22  
23 250 involved in managing patients suspected or infected by SARS-CoV-2 will be invited  
24  
25  
26  
27 251 personally and by institutional email.  
28  
29

30 252

### 33 253 **Interventions**

34  
35  
36  
37 254 Interventions will consist of low doses of HCQ 200 mg tablets every 24 hours for 60 days  
38  
39  
40 255 plus BHH 8 mg tablets every 8 hours for 60 days. Study groups will be defined as follows:  
41  
42  
43  
44 256 1) HCQ plus BHH vs placebo for both drugs. Fabrication of both drugs and placebos will be  
45  
46  
47 257 provided to our centre by a hired laboratory. Both drugs will be provided to participants  
48  
49  
50 258 directly at the hospital by a researcher blinded to group assignment process. To ensure that  
51  
52  
53  
54 259 the intervention is carried out, each participant will be asked to keep a written record of the  
55  
56  
57  
58  
59  
60

1  
2  
3 260 days and time the medication was administrated. This document will be reviewed weekly to  
4  
5  
6  
7 261 verify that more than 50% adherence to treatment is maintained. Participants will be asked  
8  
9  
10 262 to record any symptoms related to the use of the medication, which will be reviewed by a  
11  
12  
13 263 researcher blinded to group assignment, weekly, or at the participants' request.  
14  
15

16  
17 264

18  
19  
20 265 If any of the participants present symptoms of SARS-CoV-2 infection after the first 14 days  
21  
22  
23 266 from the beginning of the intervention or positive qRT-PCR is present, the drug will not be  
24  
25  
26  
27 267 discontinued. If the participant presents adverse events related to the drugs that are severe or  
28  
29  
30 268 intolerable, treatment will be suspended. If the participants report an adherence of less than  
31  
32  
33 269 50% of the medication, the intervention will not be discontinued to avoid imbalances between  
34  
35  
36  
37 270 groups. Use of drugs that interact with HCQ or BHH such as flecainide, digitalis,  
38  
39  
40 271 amiodarone, procainamide or propafenone will be prohibited. If a participant has to use these  
41  
42  
43 272 drugs during the study period, they will be eliminated from the study. A free diet and outdoor  
44  
45  
46  
47 273 activity will be allowed since these do not intervene with the implementation of the treatment  
48  
49  
50 274 or have interaction with the drugs used. Finally, incidence of adverse events such as nausea,  
51  
52  
53 275 vomiting, abdominal pain, rash, itchy skin, hair loss, lengthening of the QT interval in the  
54  
55  
56  
57  
58  
59  
60

1  
2  
3 276 electrocardiogram, corneal opacity, cardiac arrhythmias, heart failure and death will be  
4  
5  
6  
7 277 determined.

8  
9  
10 278

11  
12  
13 279 **Randomization and treatment allocation**

14  
15  
16  
17 280 Group randomization will be in a centralized and straightforward way using the Web program  
18  
19  
20 281 www.randomization.com. It will be carried out independently by a researcher blinded to  
21  
22  
23 282 inclusion criteria, delivery of medication, participant follow-up, results, statistical analysis,  
24  
25  
26  
27 283 and writing of the final manuscript. Allocation will be established, for 214 participants in  
28  
29  
30 284 blocks of 107 assigned. The selection of health workers will be made regardless of the  
31  
32  
33  
34 285 hospital shift, work schedule, or assigned area. If the desired sample size is not reached, the  
35  
36  
37 286 inclusion of personnel involved in the first line of care of other referral hospitals for patients  
38  
39  
40 287 with SARS-CoV-2 will be considered.

41  
42  
43  
44 288 An independent researcher will allocate patients to the desired groups. Envelopes will be  
45  
46  
47 289 correctly sealed by the pharmacy department and will contain HCQ plus BHH or placebos  
48  
49  
50 290 as previously mentioned. In those who do not require HCQ and BHH, the drug will be  
51  
52  
53  
54  
55  
56  
57  
58  
59  
60

1  
2  
3 291 replaced by tablets identical in colour and taste but lacking the active substance. In this way,  
4  
5

6  
7 292 drugs used in both groups will be indistinguishable.  
8  
9

10 293  
11  
12

13 294 Researcher A will recruit the participants and assess the inclusion criteria according to the  
14  
15

16 295 serological, electrocardiographic, biochemical results and clinical investigation. Once  
17  
18

19 296 included, volunteers will go to another office with researcher B, who will be blinded to the  
20  
21

22 297 first procedure and the rest of the study. Researcher B will assign the groups independently,  
23  
24

25 298 centrally, and through the use of the web program. This same researcher will be the one who  
26  
27

28 299 makes the packages indistinguishable to the person providing the drugs to the participant.  
29  
30

31 300 Researcher C will provide treatment in a sealed envelope or box to the participant in the order  
32  
33

34 301 of assignment, without knowing each participant's study group. This researcher will also be  
35  
36

37 302 blinded to the rest of the results. Participants will be blinded to the treatment they will receive.  
38  
39

40 303 The researchers performing follow-up, researchers for result assessment, and the researcher  
41  
42

43 304 who performs the statistical analysis will be blinded.  
44  
45

46 305  
47  
48  
49  
50  
51  
52  
53  
54  
55  
56  
57  
58  
59  
60

1  
2  
3 306 Informed consent will be obtained only by researcher A. If researcher A is not available, the  
4  
5  
6  
7 307 study administrator may obtain informed consent for participation. The informed consent  
8  
9  
10 308 will contain the authorization to participate in the study and the authorization for taking  
11  
12  
13 309 biological samples, electrocardiogram, and authorization to handle personal information. All  
14  
15  
16  
17 310 participants will complete a written informed consent included on the first page of the  
18  
19  
20 311 questionnaire that requires permission to participate in the study. No candidate is required to  
21  
22  
23 312 participate in the study, and their participation is based on the agreement that they may  
24  
25  
26  
27 313 withdraw at any time. All participants have the right to withdraw from the study if they feel  
28  
29  
30 314 uncomfortable answering a question or with a test to be performed. Also, no one, including  
31  
32  
33 315 the research team, will require a reason why the participant decides to leave the study.  
34  
35  
36  
37 316 In order to protect participant confidentiality, each one will be assigned a participation  
38  
39  
40 317 number, and all biological samples, as well as medical history information, will be identified  
41  
42  
43 318 by the participant's initials and participant number. Part of the confidentiality protection  
44  
45  
46  
47 319 process will include data capture only by the researcher in charge of data capture (researcher  
48  
49  
50 320 D), who will be the same for all participants and the entire study. Secondly, the study  
51  
52  
53 321 administrator may also enter data into the database if researcher D is unavailable.  
54  
55  
56  
57  
58  
59  
60

1  
2  
3 322  
4  
5  
6

7 323 The study administrator will be blinded to allocation and results of the participants. However,  
8  
9  
10 324 the administrator will be the only one who will be able to reveal the group and treatment  
11  
12  
13 325 assignment in any of the cases: major adverse events such as cardiac arrhythmias, heart  
14  
15  
16 326 failure, major neurological abnormalities, atrial or ventricular fibrillation, kidney failure, or  
17  
18  
19  
20 327 any adverse event related to pharmacological treatment that endangers the life or any organ  
21  
22  
23 328 of the participant's body. The objective of revealing the assignment by the study  
24  
25  
26 329 administrator will be to provide the participant of a timely treatment according to the drugs  
27  
28  
29  
30 330 ingested.  
31  
32

33 331  
34  
35  
36

37 332 **Participant timeline and intervention**  
38  
39

40 333 The inclusion of participants will be evaluated according to the eligibility criteria and by  
41  
42  
43 334 invitation. Volunteers who wish to participate in the study will be scheduled the next day at  
44  
45  
46  
47 335 a specialized office to carry out all the relevant studies to ensure the inclusion criteria. These  
48  
49  
50 336 include a medical history, anthropometric measurements such as weight and body mass  
51  
52  
53 337 index, electrocardiogram (every week until the end of the study or when the participant  
54  
55  
56  
57  
58  
59  
60

1  
2  
3 338 requests it if they have any discomfort), complete blood count (cbc), complete blood  
4  
5  
6  
7 339 chemistry, and serological test for antibodies and qRT-PCR for SARS-CoV-2. Volunteers  
8  
9  
10 340 will be asked for information to contact them once the serological results are obtained.  
11  
12  
13 341 Once the results are obtained (approximately 3 days), personnel eligible to participate in the  
14  
15  
16 342 study will be contacted. They will meet in a particular office to speak with a researcher who  
17  
18  
19 343 will be in charge of carrying out the eligibility criteria and medical history checklist. This  
20  
21  
22 344 researcher will be different from the one who makes the assignment, who delivers the  
23  
24  
25 345 medicine and the one who evaluates the results and performs the statistical analysis. The  
26  
27  
28 346 assignment of the group of each participant will be performed, and the participant will not  
29  
30  
31 347 know the group they have been assigned. This information will be known for the researcher  
32  
33  
34 348 in charge, unrelated to the delivery of the treatment, results, or inclusion of the participant in  
35  
36  
37 349 the study. After the assignment, the volunteers will receive the assigned treatment at the  
38  
39  
40 350 pharmacy using a code in a sealed envelope assigned by the Web. Participants who meet the  
41  
42  
43 351 inclusion criteria and there is no reason for exclusion will proceed to the second phase of  
44  
45  
46 352 group assignment with researcher B, the next business day at a different time or office than  
47  
48  
49 353 researcher A.  
50  
51  
52  
53  
54  
55  
56  
57  
58  
59  
60

1  
2  
3  
4 354

5  
6  
7 355 The group of researchers in charge of monitoring the participants, who will be blinded to the

8  
9  
10 356 group assignment at all times, will be in charge of assessing each participant's adverse event

11  
12  
13 357 and treatment adherence record weekly. These follow-up researchers will be available 24

14  
15  
16 358 hours a day throughout the week if participants experience undesirable adverse events that

17  
18  
19 359 require urgent attention or that do not allow them to continue with drug treatment. If this

20  
21  
22 360 situation happens, the researcher in charge of the follow-up will contact the study

23  
24  
25 361 administrator to reveal to the treating physicians the treatment received by the participant.

26  
27  
28 362 Health evaluation of all participants will be performed at day 30, day 60 and day 90, this

29  
30  
31 363 includes electrocardiogram analysis, blood chemistry analysis, antibody test, qRT-PCR, or

32  
33  
34 364 at request of the participant due to adverse clinical symptoms.

35  
36  
37 365 At the end of the first 60 days, a new qRT-PCR will be requested from each participant. All

38  
39  
40 366 participants who present symptoms after the first 7 days of initiation of the intervention, will

41  
42  
43 367 be considered as a positive individual for the analysis and will not be excluded from the

44  
45  
46 368 study. The same action will be carried out 90 days after the start of treatment for both groups.

47  
48  
49 369 After 60 days, the treatment will be suspended and the results of the qRT-PCR samples for



1  
2  
3 370 SARS-CoV-2 will be evaluated. After finishing the intervention (60 days), all participants  
4  
5  
6  
7 371 will be followed-up 30 more days with a new qRT-PCR at day 90 after initiation of the  
8  
9  
10 372 intervention and 30 days after the end of the intervention, to assess the efficacy or the  
11  
12  
13 373 treatment during the follow-up period.  
14  
15

16  
17 374

18  
19  
20 375 **Outcome measures**  
21

22  
23 376 This study compares the efficacy of the use of HCQ plus BHH (as a conjoined treatment) in  
24  
25  
26  
27 377 prophylactic doses for 60 days in healthy health personnel exposed to the first line of care in  
28  
29  
30 378 confirmed patients with suspected infection by SARS-CoV-2.  
31  
32

33  
34 379

35  
36  
37 380 *Primary endpoint*  
38

39  
40 381 The primary endpoint will be the proportion of health personnel infected by SARS-CoV-2 at  
41  
42  
43 382 60 days after starting treatment, in both groups. The infection will be diagnosed using qRT-  
44  
45  
46  
47 383 PCR for relative expression of the mRNA SARS-CoV-2 and the measure of IgM and IgG  
48  
49  
50 384 antibodies anti-SARS-CoV-2 after day 7 of treatment using rapid test Cellex qSARS-CoV-2  
51  
52  
53 385 IgG/IgM. All participants presenting symptoms with positive qRT-PCR after 7 days of  
54  
55  
56  
57  
58  
59  
60

1  
2  
3  
4 386 initiation of the intervention, will be considered positive and will be included in the analysis.  
5  
6

7 387 The study period will be 90 days (60 days for the primary end point plus 30 days of follow-  
8  
9

10 388 up). The proportion of infected personnel will be evaluated using relative risk (RR) and  
11  
12

13 389 absolute risk increase (ARI) with their respective 95% confidence intervals, in the established  
14  
15

16 390 time. The disease-free period in the 60 days will also be evaluated, analysing the cumulative  
17  
18

19 391 incidence of healthy personnel, presence of infection will be confirmed by qRT-PCR for  
20  
21

22 392 SARS-CoV-2 and by presence of IgM and IgG antibodies for SARS-CoV-2. The censoring  
23  
24

25 393 variable will be interruption of treatment either due to death, adverse events, or any  
26  
27

28 394 elimination criteria. Since there is the possibility of false positives and negatives with qRT-  
29  
30

31 395 PCR, we will perform qualitative measurements of IgM and IgG with the Cellex qSARS-  
32  
33

34 396 CoV-2 IgG/IgM Rapid test which is authorized by FDA. The test can be used on serum,  
35  
36

37 397 plasma, or whole blood samples. The clinical sensitivity of the assay was 93.8% and the  
38  
39

40 398 clinical specificity was 96%[30].  
41  
42

43  
44  
45  
46  
47 399

48  
49  
50 400 *Secondary endpoints*  
51  
52

1  
2  
3  
4 401 The secondary endpoint will be the proportion of health personnel infected 90 days after  
5  
6  
7 402 starting treatment in both groups. The infection will be diagnosed using qRT-PCR for relative  
8  
9  
10 403 expression of the mRNA of SARS-CoV-2 and the measure of IgM and IgG antibodies anti-  
11  
12  
13 404 SARS-CoV-2 after day 7 of the start of treatment using rapid test Cellex qSARS-CoV-2  
14  
15  
16  
17 405 IgG/IgM. The study period will be 90 days. The proportion of infected personnel will be  
18  
19  
20 406 evaluated using RR and ARI with their respective 95% confidence intervals, in the  
21  
22  
23 407 established time. The disease-free period in the 90 days will also be evaluated by analysing  
24  
25  
26  
27 408 the cumulative incidence of healthy personnel, and the presence of confirmed infection by  
28  
29  
30 409 qRT-PCR of SARS-CoV-2 will be the outcome. The censoring variable will be the  
31  
32  
33  
34 410 discontinuation of treatment either due to death, adverse events, or any elimination criteria.  
35  
36  
37 411 Also, secondary outcomes will be, in case of a positive SARS-CoV-2 result, the need for  
38  
39  
40 412 oxygen use, admission to the intensive care unit (ICU), presence of pneumonia by computer  
41  
42  
43  
44 413 tomography scan (CT), death, severe pneumonia defined by the American Thoracic  
45  
46  
47 414 Association, time from hospitalization to recovery in days.  
48  
49  
50 415 Another secondary endpoint will be adverse events, defined as the presence of any of the  
51  
52  
53  
54 416 following during the study period: death, nausea, vomiting, abdominal pain, diarrhoea, rash,  
55  
56  
57  
58  
59  
60

1  
2  
3  
4 417 itchy skin, hair loss, lengthening of the QT interval in the electrocardiogram (>500msec),  
5  
6  
7 418 corneal opacity, cardiac arrhythmias, heart failure or kidney failure (renal clearance  
8  
9  
10 419 <20ml/min). The proportion of the compound of adverse events between the groups will be  
11  
12  
13 420 analysed using RR and ARI for 60 days with their respective 95% confidence intervals.  
14  
15

16  
17 421

18  
19  
20 422 The efficacy of the treatment will be established as the proportion of volunteers infected with  
21  
22  
23 423 SARS-CoV-2. This difference should be sufficient to avoid overlapping of the 95%  
24  
25  
26  
27 424 confidence intervals. It will be considered effective if the intervals do not overlap and  
28  
29  
30 425 ineffective if when comparing groups, they have a proportion of infected whose confidence  
31  
32  
33 426 intervals overlap. This type of evaluation will allow an adequate understanding of the  
34  
35  
36  
37 427 efficacy of the treatment in both groups.  
38  
39

#### 40 428 **Handling and storage of data and documents**

41  
42  
43 429 Before the start of the study, the researchers in charge of the recruitment, assignment, and  
44  
45  
46  
47 430 delivery of drugs will be trained to perform the task assigned to them at least 3 days before  
48  
49  
50 431 the start of the study.  
51  
52  
53  
54  
55  
56  
57  
58  
59  
60

1  
2  
3  
4 432 Researcher A will assess the eligibility criteria of potential participants and perform a detailed  
5  
6  
7 433 clinical examination to assess whether they can participate in the study. The data that will be  
8  
9  
10 434 collected initially will be the following:

11  
12  
13  
14 435

15  
16  
17 436 ► Medical history (includes personal data): study identifier number, history number,  
18  
19  
20 437 name, date of birth, gender, occupation, marital status, nationality, current residence,  
21  
22  
23 438 degree of studies (primary, secondary, upper secondary, bachelor degree,  
24  
25  
26  
27 439 postgraduate), hospital service to which they belong and the number of hours worked  
28  
29  
30 440 per week.

31  
32  
33  
34 441 ► Personal history: alcohol intake (yes/no; how many glasses of beer or alcoholic  
35  
36  
37 442 beverages do you consume per week), smoking habit (yes/ no; and number of  
38  
39  
40 443 cigarettes per day), drug use (yes/no), diet per week (dietary restrictions and number  
41  
42  
43  
44 444 of meals per day) and number of hours of sleep per day.

45  
46  
47 445 ► Gynaecological history (in women): Number of pregnancies, number of live children,  
48  
49  
50 446 menarche, menopause.

- 1  
2  
3  
4 447 ▶ History of respiratory disease, history of gastrointestinal disease, nephrological,  
5  
6  
7 448 neurological, haematological, cardiovascular, allergies.  
8  
9  
10 449 ▶ Genetic family history, such as hypertension, diabetes, heart disease, kidney disease.  
11  
12  
13 450 ▶ Physical examination: blood pressure, heart rate, respiratory rate, temperature,  
14  
15  
16  
17 451 weight, height, body mass index, skin lesions, head and neck inspection, respiratory  
18  
19  
20 452 inspection (chest symmetry, lung expansion, palpation of the bases and preserved  
21  
22  
23 453 vertices, lung percussion, auscultation for lung murmur, breath sounds).  
24  
25  
26  
27 454 Cardiovascular inspection (palpation of the fifth intercostal space, auscultation of  
28  
29  
30 455 heart sounds, pulses that are palpable and symmetrical), abdominal inspection  
31  
32  
33 456 (palpation, percussion and auscultation of peristaltic sounds), neurological evaluation  
34  
35  
36  
37 457 (Glasgow, active motility, passive motility, reflex motility, cranial nerves,  
38  
39  
40 458 sensitivity).  
41  
42  
43  
44 459 ▶ Complete blood count: haematocrit, leukocytes, segmented (%), lymphocytes (%),  
45  
46  
47 460 monocytes (%), mean corpuscular volume, platelets.  
48  
49  
50 461 ▶ Blood chemistry: glycaemia, urea, creatinine, sodium, potassium, chlorine, aspartate  
51  
52  
53  
54 462 transaminase, alanine transaminase, alkaline phosphatase, total bilirubin.  
55  
56  
57  
58  
59  
60

- 1  
2  
3  
4 463 ▶ Muscle enzymes (creatine kinase)  
5  
6  
7 464 ▶ Clotting times: thrombin time, prothrombin time, international normalized ratio.  
8  
9  
10 465 ▶ Electrocardiogram: rhythm, heart rate, heart axis, evaluation of P wave, PR interval,  
11  
12  
13 466 duration of QRS, QT interval, time of T wave. The electrocardiogram will be  
14  
15  
16  
17 467 performed using an instrument calibrated and validated for its use internationally,  
18  
19  
20 468 weekly.  
21  
22  
23 469 ▶ Molecular test results for IgG and IgM antibodies:  
24  
25  
26  
27 470 ○ The FDA approved product called Cellex qSARS-CoV-2 IgG/IgM Rapid Test  
28  
29  
30 471 will be used for serological determination. The device cassette, sample, and  
31  
32  
33 472 buffer solution must be at room temperature. The sample (10 µL) is  
34  
35  
36  
37 473 transferred to the centre of the sample well. After the sample well is free of  
38  
39  
40 474 liquid, two drops of sample diluent are added. After fifteen to twenty minutes,  
41  
42  
43  
44 475 read the test results. Results should not be read after twenty minutes.  
45  
46  
47 476 ○ A positive IgM result occurs when a coloured band appears on the M test line  
48  
49  
50 477 (M) and the control line (C) and indicates that IgM against SARS-CoV-2 is  
51  
52  
53  
54 478 present.  
55  
56  
57  
58  
59  
60

- 1  
2  
3  
4 479           ○ A positive IgG result occurs when a coloured band appears on the G test line  
5  
6  
7 480           (G) and the control line (C) and indicates that IgG against SARS-CoV-2 is  
8  
9  
10 481           present.
- 11  
12  
13 482           ○ A positive result for IgM and IgG occurs when coloured bands occur both M  
14  
15  
16 483           and G, as well as C.
- 17  
18  
19  
20 484           ○ A negative result occurs when a coloured band appears in C only and indicates  
21  
22  
23 485           that IgM and IgG antibodies against SARS-CoV-2 were not detected.
- 24  
25  
26  
27 486           ○ An invalid result occurs when a colour band is not produced in C, and the test  
28  
29  
30 487           must be repeated.

31  
32  
33 488           ▶ Official qRT-PCR results

34  
35  
36  
37 489   All this information will be collected in a pre-established medical history questionnaire for  
38  
39  
40 490   each potential participant. The information obtained from the weekly assessment of adverse  
41  
42  
43 491   events, and the results of the qRT-PCR for SARS-CoV-2 at 60 and 90 days (60 for the  
44  
45  
46  
47 492   primary end point plus 30 more days of follow-up) after starting treatment will be entered  
48  
49  
50 493   into an online database. In order to ensure the quality of the data collection, the database will  
51  
52  
53  
54 494   be built in CASTOR, a database on the Web that allows entering all the pre-defined data for



1  
2  
3  
4 495 each participant, thus reducing human error. This information will be stored on a server in  
5  
6  
7 496 the United States of America and can only be accessed by the study's administrator. The data  
8  
9  
10 497 may only be entered by a researcher in charge of collecting the data sheets and emptying  
11  
12  
13 498 them.

### 17 499 **Monitoring and quality assurance**

20 500 Every possible adverse event will be noted daily by the participants in the agenda that will  
21  
22  
23 501 be delivered to them. This agenda will be evaluated weekly by the researcher in charge of  
24  
25  
26 502 monitoring the participants (who will be blinded to group assignment). In case of unbearable  
27  
28  
29  
30 503 adverse events for the participants or that put their health at risk, an open line will be available  
31  
32  
33 504 24 hours a day with direct communication to the researcher in charge of monitoring the study  
34  
35  
36  
37 505 to report any event that requires hospitalization or immediate evaluation at the hospital. All  
38  
39  
40 506 participants with adverse events that put their life or health at risk may be urgently assessed  
41  
42  
43  
44 507 by personnel from both INCMNSZ and INR-LGII, if possible, by the staff involved into the  
45  
46  
47 508 study. Patient follow-up investigator will immediately contact the study administrator to  
48  
49  
50 509 disclose the participant's assignment to treating physicians at that institution, but the  
51  
52  
53  
54 510 assignment will never be disclosed to other investigators related to the study. All the study  
55  
56  
57  
58  
59  
60

1  
2  
3 511 expenses and/or attention of collateral effects will be covered by the current cost of the  
4  
5  
6  
7 512 financing SECTEI/061/2020.  
8  
9

10 513 Auditing will be carried out weekly, assessing adverse events, capturing data in the  
11  
12  
13 514 corresponding datasheets by the study administrator. Likewise, the data entered in the  
14  
15  
16 515 CASTOR web base will be valued to validate its quality. The paper data sheets must be kept  
17  
18  
19  
20 516 in a special office dedicated to the study in folders separated by volunteers with the informed  
21  
22  
23 517 consent of each participant, the data of the medical history, laboratory results, eligibility  
24  
25  
26 518 criteria, adverse event sheet and results, molecular tests, as well as electrocardiogram. The  
27  
28  
29  
30 519 letter of revocation of informed consent will also be protected if required. As part of the audit,  
31  
32  
33 520 an interim analysis will be carried out 30 days after the study starts to assess the possible  
34  
35  
36 521 adverse effects and whether these outweigh the potential benefits of the intervention. In the  
37  
38  
39  
40 522 adverse event outweigh the potential benefits, termination of the study will be assessed. The  
41  
42  
43 523 approval of the research ethics committee of the INR-LGII of Mexico has been obtained.  
44  
45

46  
47 524

48  
49  
50 525 **Statistical analysis**  
51  
52  
53  
54  
55  
56  
57  
58  
59  
60

1  
2  
3 526 Data analysis will be carried out by intention to treat, which means that each participant will  
4  
5  
6  
7 527 be analysed according to the group assigned regardless of whether they modified their  
8  
9  
10 528 treatment. The study variables will be divided according to the allocation group. The  
11  
12  
13 529 statistical analysis will be carried out by evaluation the difference between the different  
14  
15  
16 530 groups of HCQ plus BHH versus placebos. Missing data will be handled by multiple  
17  
18  
19  
20 531 imputation analysis when missing at random. Deaths will be censored.  
21  
22

23  
24 532

25  
26  
27 533 The primary objective will be expressed in number and proportion for each group. The RR  
28  
29  
30 534 will be obtained as the division between the proportion of primary outcomes in the  
31  
32  
33 535 intervention group(s) by the proportion of primary outcomes in the double placebo group.  
34  
35  
36  
37 536 Adjusted risk ratios (aRR) will be obtained using a log-binomial regression, adjusting for age  
38  
39  
40 537 and gender as pre-specified confounding variables. It will be expressed as RR with its  
41  
42  
43 538 respective 95% confidence interval for the initial time, which is 60 days. Likewise, the result  
44  
45  
46  
47 539 will be expressed as absolute risk, which will be derived from the proportion of the primary  
48  
49  
50 540 outcome in the intervention group minus the proportion of the primary outcome in the control  
51  
52  
53  
54 541 group. Secondly, the primary objective will be analysed with the non-parametric estimate  
55  
56  
57  
58  
59  
60

1  
2  
3  
4 542 of the survival and risk function using Kaplan-Meier curves for 60 days according to the  
5  
6  
7 543 allocation group. The primary endpoint will be SARS-CoV-2 infection within the 60-day  
8  
9  
10 544 period, and the silencing variable will be dropping out of the study for any reason. The  
11  
12  
13 545 comparison of the survival curves between both groups will be carried out using the log-rank  
14  
15  
16  
17 546 test. Risk ratio will be used for treatment effect. A log-binomial regression adjusted by age,  
18  
19  
20 547 gender, service in which the participant works, body mass index, will be used.  
21  
22

23  
24 548

25  
26  
27 549 For secondary outcomes such as the analysis at 90 days, the same statistical analysis  
28  
29  
30 550 expressed in RR and absolute risk will be used. Survival analysis will be used for the primary  
31  
32  
33  
34 551 endpoint only. An interim statistical analysis will be performed 30 days after the study starts  
35  
36  
37 552 to assess possible adverse effects and the efficacy of the intervention. The study administrator  
38  
39  
40 553 will be the only one with access to the data. For the interim analysis and the final analysis,  
41  
42  
43  
44 554 the administrator will export the data to Excel format to be analysed by the study statistician  
45  
46  
47 555 blinded to the assignment of groups, participants, or results.  
48  
49

50  
51 556

52  
53  
54 557 **Adverse events, serious adverse events and suspected unexpected serious adverse reactions**  
55  
56  
57  
58  
59  
60

1  
2  
3 558 By requiring the use of drugs, the participant will be exposed to risks inherent to the drug  
4  
5  
6  
7 559 used, ranging from mild to severe or death. Any unexpected risks that may occur during the  
8  
9  
10 560 study will be immediately explained to the participants and the ethics committee. Any  
11  
12  
13 561 adverse event will be compiled and will not be disclosed under any condition to anyone other  
14  
15  
16  
17 562 than the study administrator, treating physicians in case of severe events, and the ethics  
18  
19  
20 563 committee. The results will be completely anonymous concerning the names of the  
21  
22  
23 564 participants. The results will be compiled and reported as combined collective data.  
24  
25  
26  
27 565  
28  
29  
30 566  
31  
32

33 567 *Patient and public involvement*

34  
35  
36  
37 568 Patients were not involved in the development of this research. However, the results of the  
38  
39  
40 569 study will be communicated to the study participants by sending the end product (published  
41  
42  
43 570 article) to the provided email address.  
44  
45  
46

47 571

48  
49  
50 572 **ETHICS, DISSEMINATION AND SAFETY MONITORING**  
51  
52  
53  
54  
55  
56  
57  
58  
59  
60

1  
2  
3 573 In case of adverse events or complications derived from the study, participants will be assured  
4  
5  
6  
7 574 attention by the staff of the INCMNSZ in an enclosure that ensures the safety of the  
8  
9  
10 575 participant, not subjecting volunteers to a higher risk of contamination. This care will be  
11  
12  
13 576 extended until adverse events are resolved. In case of no adverse events during the study,  
14  
15  
16  
17 577 medical attention will be extended at the aforementioned institute until 15 days after the end  
18  
19  
20 578 of the study.  
21  
22

23  
24 579

25  
26  
27 580 This protocol has been approved by the local medical ethical review committee at the INR-  
28  
29  
30 581 LGII with the internal number INRLGII/25/20, and by the Federal Commission for  
31  
32  
33 582 Protection against Sanitary Risks (in Spanish, Comisión Federal para la Protección contra  
34  
35  
36  
37 583 Riesgos Sanitarios, COFEPRIS), approval number 203300410A0058/2020.  
38  
39

40 584 The study results will be published in journals of worldwide impact affiliated with the Journal  
41  
42  
43 585 Citation Reports. Likewise, the results of the study will be disseminated in national and  
44  
45  
46  
47 586 international media, exposed in international and national congresses, communicated to  
48  
49  
50 587 CONACYT, and recorded in Clinicaltrials.gov according to the study identifier number. The  
51  
52  
53  
54  
55  
56  
57  
58  
59  
60

1  
2  
3 588 help of non-profit organizations will be sought to disseminate the results of the investigation

4  
5  
6  
7 589 to interest groups.

8  
9  
10 590 The complete protocol will be published on Clinicaltrials.gov and the OSF - Center for Open

11  
12  
13 591 Science platform <https://osf.io/>. Where a DOI will be assigned, and the amendments made to

14  
15  
16  
17 592 the original protocol will be assessed.

18  
19  
20 593

21  
22  
23 594 Amendments to the protocol may be made before the start of the study and during the study.

24  
25  
26 595 Any amendment to the protocol will be clarified and posted on Clinicaltrials.gov under the

27  
28  
29  
30 596 same identifier as this study. Likewise, any amendment will be sent to the ethics committee

31  
32  
33 597 of the same hospital.

34  
35  
36  
37 598

38  
39  
40 599 **AUTHOR CONTRIBUTIONS**

41  
42  
43 600 JGM is the lead study investigator, developed the study concepts and design, and wrote the

44  
45  
46 601 manuscript by adapting the original study protocol for publication, subsequent reviews and

47  
48  
49  
50 602 amendments. EJHL, KMM and AAA contributed to the development and refining of the

51  
52  
53 603 protocol, writing of manuscript and subsequent review. RJMP provided advanced

1  
2  
3 604 methodological and statistical input, and contributed to the study design and subsequent  
4  
5  
6  
7 605 amendments. RFC, TCH, PSSB, RAG and NML reviewed, commented and informed  
8  
9  
10 606 methodology, development and writing of the protocol.  
11  
12

13  
14 607

15  
16  
17 608 **FUNDING STATEMENT**  
18

19  
20 609 This work was supported by the Mexican Education, Science, Technology and Innovation  
21  
22  
23 610 Department (in Spanish, Secretaría de Educación, Ciencia, Tecnología e Innovación), grant  
24  
25  
26  
27 611 number SECTEI/061/20.  
28  
29

30 612

31  
32  
33 613 **COMPETING INTERESTS STATEMENT**  
34

35  
36  
37 614 None of the authors have conflict of interests, commercial agreements, or receive financial  
38  
39  
40 615 fees or compensation from any commercial or pharmaceutical company.  
41  
42

43  
44 616

45  
46  
47 617 **ETHICS APPROVAL**  
48

49  
50 618 This protocol has been approved by the local medical ethical review committee at the INR-  
51  
52  
53 619 LGII with the internal number INRLGII/25/20. Definitions of Research Risk Regulation of  
54  
55  
56



1  
2  
3 620 the General Health Law on Research for Health (in Spanish, Reglamento de la Ley General  
4  
5  
6  
7 621 de Salud en Materia de Investigación para la Salud)  
8  
9  
10 622 <http://www.inr.gob.mx/Descargas/Investigacion/Reglamentos-LGS-Materia-Investigacion->  
11  
12  
13 623 Salud.pdf. ARTICLE 17; and by Federal Commission for Protection against Sanitary Risks  
14  
15  
16  
17 624 (in Spanish, Comisión Federal para la Protección contra Riesgos Sanitarios, COFEPRIS),  
18  
19  
20 625 approval number 203300410A0058/2020.  
21  
22

23  
24 626

25  
26  
27 627 **PROVENANCE AND PEER REVIEW**  
28

29  
30 628 Not commissioned; externally peer reviewed.  
31  
32

33  
34 629

35  
36  
37 630 **ORCID ID**  
38

39  
40 631 Julio Granados-Montiel <https://orcid.org/0000-0002-0611-64>  
41  
42

43  
44 632

45  
46  
47 633

48  
49  
50 634

51  
52  
53 635

## 636 REFERENCES

- 637 1 [Internet]. C.DM. COVID-19 Dashboard México. 2021 [cited 2021 21/01/2021].
- 638 2 Pal M, Berhanu G, Desalegn C, *et al*. Severe Acute Respiratory Syndrome  
639 Coronavirus-2 (SARS-CoV-2): An Update. *Cureus* Published Online First: 2020.  
640 doi:10.7759/cureus.7423
- 641 3 Lai C, Yu R, Wang M, *et al*. Shorter incubation period is associated with severe  
642 disease progression in patients with COVID-19. *Virulence* Published Online First:  
643 2020. doi:10.1080/21505594.2020.1836894
- 644 4 Guan W, Ni Z, Hu Y, *et al*. Clinical Characteristics of Coronavirus Disease 2019 in  
645 China. *N Engl J Med* Published Online First: 2020. doi:10.1056/nejmoa2002032
- 646 5 Li C, Ji F, Wang L, *et al*. Asymptomatic and Human-to-Human Transmission of  
647 SARS-CoV-2 in a 2-Family Cluster, Xuzhou, China. *Emerg Infect Dis* Published  
648 Online First: 2020. doi:10.3201/eid2607.200718
- 649 6 Xu H, Zhong L, Deng J, *et al*. High expression of ACE2 receptor of 2019-nCoV on  
650 the epithelial cells of oral mucosa. *Int J Oral Sci* Published Online First: 2020.  
651 doi:10.1038/s41368-020-0074-x

- 1  
2  
3 652 7 Levy A, Yagil Y, Bursztyn M, *et al.* ACE2 expression and activity are enhanced  
4  
5  
6  
7 653 during pregnancy. *Am J Physiol - Regul Integr Comp Physiol* Published Online  
8  
9  
10 654 First: 2008. doi:10.1152/ajpregu.90592.2008  
11  
12  
13 655 8 Baig AM, Khaleeq A, Ali U, *et al.* Evidence of the COVID-19 Virus Targeting the  
14  
15  
16  
17 656 CNS: Tissue Distribution, Host-Virus Interaction, and Proposed Neurotropic  
18  
19  
20 657 Mechanisms. *ACS Chem. Neurosci.* 2020. doi:10.1021/acchemneuro.0c00122  
21  
22  
23 658 9 Zhan M, Qin Y, Xue X, *et al.* Death from Covid-19 of 23 Health Care Workers in  
24  
25  
26  
27 659 China. *N Engl J Med* Published Online First: 2020. doi:10.1056/nejmc2005696  
28  
29  
30 660 10 Wu Z, McGoogan JM. Characteristics of and Important Lessons From the  
31  
32  
33 661 Coronavirus Disease 2019 (COVID-19) Outbreak in China. *JAMA* Published Online  
34  
35  
36  
37 662 First: 2020. doi:10.1001/jama.2020.2648  
38  
39  
40 663 11 Remuzzi A, Remuzzi G. COVID-19 and Italy: what next? *Lancet.* 2020.  
41  
42  
43  
44 664 doi:10.1016/S0140-6736(20)30627-9  
45  
46  
47 665 12 Luzzi GA, Peto TEA. Adverse Effects of Antimalarials: An Update. *Drug Saf.* 1993.  
48  
49  
50 666 doi:10.2165/00002018-199308040-00004  
51  
52  
53 667 13 Wang LF, Lin YS, Huang NC, *et al.* Hydroxychloroquine-inhibited dengue virus is  
54  
55  
56  
57  
58  
59  
60

- 1  
2  
3 668 associated with host defense machinery. *J Interf Cytokine Res* 2015;35:143–56.  
4  
5  
6  
7 669 doi:10.1089/jir.2014.0038  
8  
9  
10 670 14 Gouda Kamel Helal, Magdy Abdelmawgoud Gad, Mohamed Fahmy Abd-Ellah and  
11  
12  
13 671 MSE. Hydroxychloroquine Augments Early Virological Response to Pegylated  
14  
15  
16 672 Interferon Plus Ribavirin in Genotype-4 Chronic Hepatitis C Patients. *Antivir Ther*  
17  
18  
19  
20 673 2006;55:52–5. doi:10.1002/jmv  
21  
22  
23 674 15 Wang M, Cao R, Zhang L, *et al.* Remdesivir and chloroquine effectively inhibit the  
24  
25  
26 675 recently emerged novel coronavirus (2019-nCoV) in vitro. *Cell Res.* 2020.  
27  
28  
29  
30 676 doi:10.1038/s41422-020-0282-0  
31  
32  
33 677 16 Gao J, Tian Z, Yang X. Breakthrough: Chloroquine phosphate has shown apparent  
34  
35  
36 678 efficacy in treatment of COVID-19 associated pneumonia in clinical studies. *Biosci.*  
37  
38  
39  
40 679 Trends. 2020. doi:10.5582/BST.2020.01047  
41  
42  
43 680 17 Yao X, Ye F, Zhang M, *et al.* In Vitro Antiviral Activity and Projection of  
44  
45  
46 681 Optimized Dosing Design of Hydroxychloroquine for the Treatment of Severe Acute  
47  
48  
49 682 Respiratory Syndrome Coronavirus 2 (SARS-CoV-2). *Clin Infect Dis* Published  
50  
51  
52  
53 683 Online First: 2020. doi:10.1093/cid/ciaa237  
54  
55  
56  
57  
58  
59  
60

- 1  
2  
3 684 18 Dutta D, Sharma M, Sharma R. Short-term hydroxychloroquine in COVID-19  
4  
5  
6  
7 685 infection in people with or without metabolic syndrome - clearing safety issues and  
8  
9  
10 686 good clinical practice. *Eur. Endocrinol.* 2020. doi:10.17925/ee.2020.16.2.109  
11  
12  
13 687 19 Han H, Ma Q, Li C, *et al.* Profiling serum cytokines in COVID-19 patients reveals  
14  
15  
16  
17 688 IL-6 and IL-10 are disease severity predictors. *Emerg Microbes Infect* Published  
18  
19  
20 689 Online First: 2020. doi:10.1080/22221751.2020.1770129  
21  
22  
23 690 20 Paiardini M, Müller-Trutwin M. HIV-associated chronic immune activation.  
24  
25  
26  
27 691 *Immunol Rev* Published Online First: 2013. doi:10.1111/imr.12079  
28  
29  
30 692 21 Chude CI, Amaravadi RK. Targeting autophagy in cancer: Update on clinical trials  
31  
32  
33  
34 693 and novel inhibitors. *Int. J. Mol. Sci.* 2017. doi:10.3390/ijms18061279  
35  
36  
37 694 22 Geleris J, Sun Y, Platt J, *et al.* Observational Study of Hydroxychloroquine in  
38  
39  
40 695 Hospitalized Patients with Covid-19. *N Engl J Med* 2020;382:2411–8.  
41  
42  
43 696 doi:10.1056/nejmoa2012410  
44  
45  
46  
47 697 23 Zahr N, Urien S, Llopis B, *et al.* Pharmacokinetics and pharmacodynamics of  
48  
49  
50 698 hydroxychloroquine in hospitalized patients with COVID-19. *Therapies* Published  
51  
52  
53  
54 699 Online First: 2021. doi:10.1016/j.therap.2021.01.056  
55  
56  
57  
58  
59  
60

- 1  
2  
3 700 24 Chang R, Sun WZ. Repositioning chloroquine as antiviral prophylaxis against  
4  
5  
6  
7 701 COVID-19: potential and challenges. *Drug Discov Today* 2020;**25**:1786–92.  
8  
9  
10 702 doi:10.1016/j.drudis.2020.06.030  
11  
12  
13 703 25 Juurlink DN. Safety considerations with chloroquine, hydroxychloroquine and  
14  
15  
16 704 azithromycin in the management of SARS-CoV-2 infection. *CMAJ*. 2020.  
17  
18  
19 705 doi:10.1503/cmaj.200528  
20  
21  
22  
23 706 26 Zanasi A, Mazzolini M, Kantar A. A reappraisal of the mucoactive activity and  
24  
25  
26 707 clinical efficacy of bromhexine. *Multidiscip. Respir. Med*. 2017.  
27  
28  
29 708 doi:10.1186/s40248-017-0088-1  
30  
31  
32  
33 709 27 Depfenhart M, de Villiers D, Lemperle G, *et al*. Potential new treatment strategies  
34  
35  
36 710 for COVID-19: is there a role for bromhexine as add-on therapy? *Intern. Emerg.*  
37  
38  
39 711 *Med*. 2020. doi:10.1007/s11739-020-02383-3  
40  
41  
42  
43 712 28 Hoffmann M, Kleine-Weber H, Schroeder S, *et al*. SARS-CoV-2 Cell Entry Depends  
44  
45  
46 713 on ACE2 and TMPRSS2 and Is Blocked by a Clinically Proven Protease Inhibitor.  
47  
48  
49 714 *Cell* Published Online First: 2020. doi:10.1016/j.cell.2020.02.052  
50  
51  
52  
53 715 29 Mareev VY, Orlova YA, Pavlikova EP, *et al*. Combination therapy at an early stage  
54  
55  
56  
57  
58  
59  
60

1  
2  
3 716 of the novel coronavirus infection (COVID-19). Case series and design of the  
4  
5  
6  
7 717 clinical trial 'BromhexIne and Spironolactone for Coronavirus Infection requiring  
8  
9  
10 718 hospitalization (BISCUIT)'. *Kardiologiya* Published Online First: 2020.

11  
12  
13 719 doi:10.18087/cardio.2020.8.n1307

14  
15  
16  
17 720 30 Ravi N, Cortade DL, Ng E, *et al.* Diagnostics for SARS-CoV-2 detection: A  
18  
19  
20 721 comprehensive review of the FDA-EUA COVID-19 testing landscape. *Biosens*

21  
22  
23 722 *Bioelectron* 2020;165. doi:10.1016/j.bios.2020.112454

24  
25  
26  
27 723

28  
29  
30 724  
31  
32  
33  
34  
35  
36  
37  
38  
39  
40  
41  
42  
43  
44  
45  
46  
47  
48  
49  
50  
51  
52  
53  
54  
55  
56  
57  
58  
59  
60

SPIRIT 2013 Checklist: Recommended items to address in a clinical trial protocol and related documents\*

| Section/item                      | ItemNo | Description                                                                                                                                                                                                                                                                              | Page/Line            |
|-----------------------------------|--------|------------------------------------------------------------------------------------------------------------------------------------------------------------------------------------------------------------------------------------------------------------------------------------------|----------------------|
| <b>Administrative information</b> |        |                                                                                                                                                                                                                                                                                          |                      |
| Title                             | 1      | Descriptive title identifying the study design, population, interventions, and, if applicable, trial acronym                                                                                                                                                                             | 1/1-3                |
| Trial registration                | 2a     | Trial identifier and registry name. If not yet registered, name of intended registry                                                                                                                                                                                                     | 4/72                 |
|                                   | 2b     | All items from the World Health Organization Trial Registration Data Set                                                                                                                                                                                                                 | NA                   |
| Protocol version                  | 3      | Date and version identifier                                                                                                                                                                                                                                                              | 4/74                 |
| Funding                           | 4      | Sources and types of financial, material, and other support                                                                                                                                                                                                                              | 32/623625            |
| Roles and responsibilities        | 5a     | Names, affiliations, and roles of protocol contributors                                                                                                                                                                                                                                  | 1/5-17<br>31/614-620 |
|                                   | 5b     | Name and contact information for the trial sponsor                                                                                                                                                                                                                                       | 1/19-23              |
|                                   | 5c     | Role of study sponsor and funders, if any, in study design; collection, management, analysis, and interpretation of data; writing of the report; and the decision to submit the report for publication, including whether they will have ultimate authority over any of these activities | 31/614-620           |
|                                   | 5d     | Composition, roles, and responsibilities of the coordinating centre, steering committee, endpoint adjudication committee, data management team, and other individuals or groups overseeing the trial, if applicable (see Item 21a for data monitoring committee)                         | NA                   |
| <b>Introduction</b>               |        |                                                                                                                                                                                                                                                                                          |                      |
| Background and rationale          | 6a     | Description of research question and justification for undertaking the trial, including summary of relevant studies (published and unpublished) examining benefits and harms for each intervention                                                                                       | 6-9/98-187           |
|                                   | 6b     | Explanation for choice of comparators                                                                                                                                                                                                                                                    | 9/180-187            |
| Objectives                        | 7      | Specific objectives or hypotheses                                                                                                                                                                                                                                                        | 9/183-187            |
| Trial design                      | 8      | Description of trial design including type of trial (eg, parallel group, crossover, factorial, single group), allocation ratio, and framework (eg, superiority, equivalence, noninferiority, exploratory)                                                                                | 10/191-193           |



|                                                                       |     |                                                                                                                                                                                                                                                                                                                                                                                |               |
|-----------------------------------------------------------------------|-----|--------------------------------------------------------------------------------------------------------------------------------------------------------------------------------------------------------------------------------------------------------------------------------------------------------------------------------------------------------------------------------|---------------|
| <b>Methods:<br/>Participants,<br/>interventions,<br/>and outcomes</b> |     |                                                                                                                                                                                                                                                                                                                                                                                |               |
| Study setting                                                         | 9   | Description of study settings (eg, community clinic, academic hospital) and list of countries where data will be collected. Reference to where list of study sites can be obtained                                                                                                                                                                                             | 10/197-211    |
| Eligibility criteria                                                  | 10  | Inclusion and exclusion criteria for participants. If applicable, eligibility criteria for study centres and individuals who will perform the interventions (eg, surgeons, psychotherapists)                                                                                                                                                                                   | 11-12/212-248 |
| Interventions                                                         | 11a | Interventions for each group with sufficient detail to allow replication, including how and when they will be administered                                                                                                                                                                                                                                                     | 17/265-288    |
|                                                                       | 11b | Criteria for discontinuing or modifying allocated interventions for a given trial participant (eg, drug dose change in response to harms, participant request, or improving/worsening disease)                                                                                                                                                                                 | 17/278-281    |
|                                                                       | 11c | Strategies to improve adherence to intervention protocols, and any procedures for monitoring adherence (eg, drug tablet return, laboratory tests)                                                                                                                                                                                                                              | 17/269-274    |
|                                                                       | 11d | Relevant concomitant care and interventions that are permitted or prohibited during the trial                                                                                                                                                                                                                                                                                  | NA            |
| Outcomes                                                              | 12  | Primary, secondary, and other outcomes, including the specific measurement variable (eg, systolic blood pressure), analysis metric (eg, change from baseline, final value, time to event), method of aggregation (eg, median, proportion), and time point for each outcome. Explanation of the clinical relevance of chosen efficacy and harm outcomes is strongly recommended | 22-24/392-432 |
| Participant timeline                                                  | 13  | Time schedule of enrolment, interventions (including any run-ins and washouts), assessments, and visits for participants. A schematic diagram is highly recommended (see Figure)                                                                                                                                                                                               | 20-22/344-384 |
| Sample size                                                           | 14  | Estimated number of participants needed to achieve study objectives and how it was determined, including clinical and statistical assumptions supporting any sample size calculations                                                                                                                                                                                          | 16/253-260    |

|                                                                     |     |                                                                                                                                                                                                                                                                                                                                                                                                              |               |
|---------------------------------------------------------------------|-----|--------------------------------------------------------------------------------------------------------------------------------------------------------------------------------------------------------------------------------------------------------------------------------------------------------------------------------------------------------------------------------------------------------------|---------------|
| Recruitment                                                         | 15  | Strategies for achieving adequate participant enrolment to reach target sample size                                                                                                                                                                                                                                                                                                                          | 10-16/207-250 |
| <b>Methods: Assignment of interventions (for controlled trials)</b> |     |                                                                                                                                                                                                                                                                                                                                                                                                              |               |
| Allocation:                                                         |     |                                                                                                                                                                                                                                                                                                                                                                                                              |               |
| Sequence generation                                                 | 16a | Method of generating the allocation sequence (eg, computer-generated random numbers), and list of any factors for stratification. To reduce predictability of a random sequence, details of any planned restriction (eg, blocking) should be provided in a separate document that is unavailable to those who enrol participants or assign interventions                                                     | 18/291-295    |
| Allocation concealment mechanism                                    | 16b | Mechanism of implementing the allocation sequence (eg, central telephone; sequentially numbered, opaque, sealed envelopes), describing any steps to conceal the sequence until interventions are assigned                                                                                                                                                                                                    | 18-19/299-303 |
| Implementation                                                      | 16c | Who will generate the allocation sequence, who will enrol participants, and who will assign participants to interventions                                                                                                                                                                                                                                                                                    | 19/305-315    |
| Blinding (masking)                                                  | 17a | Who will be blinded after assignment to interventions (eg, trial participants, care providers, outcome assessors, data analysts), and how                                                                                                                                                                                                                                                                    | 19/307-315    |
|                                                                     | 17b | If blinded, circumstances under which unblinding is permissible, and procedure for revealing a participant's allocated intervention during the trial                                                                                                                                                                                                                                                         | NA            |
| <b>Methods: Data collection, management, and analysis</b>           |     |                                                                                                                                                                                                                                                                                                                                                                                                              |               |
| Data collection methods                                             | 18a | Plans for assessment and collection of outcome, baseline, and other trial data, including any related processes to promote data quality (eg, duplicate measurements, training of assessors) and a description of study instruments (eg, questionnaires, laboratory tests) along with their reliability and validity, if known. Reference to where data collection forms can be found, if not in the protocol | 27/504-510    |

|                                 |     |                                                                                                                                                                                                                                                                                                                                       |               |
|---------------------------------|-----|---------------------------------------------------------------------------------------------------------------------------------------------------------------------------------------------------------------------------------------------------------------------------------------------------------------------------------------|---------------|
|                                 | 18b | Plans to promote participant retention and complete follow-up, including list of any outcome data to be collected for participants who discontinue or deviate from intervention protocols                                                                                                                                             | NA            |
| Data management                 | 19  | Plans for data entry, coding, security, and storage, including any related processes to promote data quality (eg, double data entry; range checks for data values). Reference to where details of data management procedures can be found, if not in the protocol                                                                     | 27/508-513    |
| Statistical methods             | 20a | Statistical methods for analyzing primary and secondary outcomes. Reference to where other details of the statistical analysis plan can be found, if not in the protocol                                                                                                                                                              | 29/542-547    |
|                                 | 20b | Methods for any additional analyses (eg, subgroup and adjusted analyses)                                                                                                                                                                                                                                                              | 29/560-563    |
|                                 | 20c | Definition of analysis population relating to protocol non-adherence (eg, as randomized analysis), and any statistical methods to handle missing data (eg, multiple imputation)                                                                                                                                                       | 29/546-547    |
| <b>Methods: Monitoring</b>      |     |                                                                                                                                                                                                                                                                                                                                       |               |
| Data monitoring                 | 21a | Composition of data monitoring committee (DMC); summary of its role and reporting structure; statement of whether it is independent from the sponsor and competing interests; and reference to where further details about its charter can be found, if not in the protocol. Alternatively, an explanation of why a DMC is not needed | NA            |
|                                 | 21b | Description of any interim analyses and stopping guidelines, including who will have access to these interim results and make the final decision to terminate the trial                                                                                                                                                               | 30/567-571    |
| Harms                           | 22  | Plans for collecting, assessing, reporting, and managing solicited and spontaneously reported adverse events and other unintended effects of trial interventions or trial conduct                                                                                                                                                     | 30/575-581    |
| Auditing                        | 23  | Frequency and procedures for auditing trial conduct, if any, and whether the process will be independent from investigators and the sponsor                                                                                                                                                                                           | 28-29/529-539 |
| <b>Ethics and dissemination</b> |     |                                                                                                                                                                                                                                                                                                                                       |               |
| Research ethics approval        | 24  | Plans for seeking research ethics committee/institutional review board (REC/IRB) approval                                                                                                                                                                                                                                             | 31/589-599    |

|                          |     |                                                                                                                                                                                                                                  |            |
|--------------------------|-----|----------------------------------------------------------------------------------------------------------------------------------------------------------------------------------------------------------------------------------|------------|
| Protocol amendments      | 25  | Plans for communicating important protocol modifications (eg, changes to eligibility criteria, outcomes, analyses) to relevant parties (eg, investigators, REC/IRBs, trial participants, trial registries, journals, regulators) | 32/600-605 |
| Consent or assent        | 26a | Who will obtain informed consent or assent from potential trial participants or authorised surrogates, and how (see Item 32)                                                                                                     | 19/317-318 |
|                          | 26b | Additional consent provisions for collection and use of participant data and biological specimens in ancillary studies, if applicable                                                                                            | NA         |
| Confidentiality          | 27  | How personal information about potential and enrolled participants will be collected, shared, and maintained in order to protect confidentiality before, during, and after the trial                                             | 20/327-332 |
| Declaration of interests | 28  | Financial and other competing interests for principal investigators for the overall trial and each study site                                                                                                                    | 33/631-632 |
| Access to data           | 29  | Statement of who will have access to the final trial dataset, and disclosure of contractual agreements that limit such access for investigators                                                                                  | 28/510-513 |
